# Supplementary material
Source: Research Square preprint supplement (doi:10.21203/rs.3.rs-9449467/v1)
Supplement: Supplementary file 1 [file 5bb9abd3155515e88c01a176.xlsx]

## Sheet: List of Strategic Effects_cop
ID	Comp	Intensity of Force	Strategic Effect	1	2	3	4
1	D	-1.0;-0.8	Established government in exile	D	I	M	E
2	E	-1.0;-0.8	Collapsed health system	D	E	M	I
3	E	-1.0;-0.8	Massively displaced population	D	E	M	I
4	E	-1.0;-0.8	Strictly limited humanitarian intervention	D	E	I	M
5	M	-1.0;-0.8	Recurrently assassinated prominent figures	D	I	M	E
6	E	-1.0;-0.8	Critically broken humanitarian system	D	I	E	M
7	E	-1.0;-0.8	Collapsed economy	E	D	I	M
8	E	-1.0;-0.8	Imposed severe economic sanctions	E	D	I	M
9	I	-1.0;-0.8	Completely interrupted communications	I	D	M	E
10	E	-1.0;-0.8	Frequently recovered assets	I	D	M	E
11	M	-1.0;-0.8	Eliminated dissidents	M	I	D	E
12	E	-1.0;-0.8	Massively destroyed infrastructure or assets	M	D	E	I
13	E	-1.0;-0.8	Collapsed society	M	D	E	I
14	E	-1.0;-0.8	Significantly increased mortality rate	M	D	I	E
15	D	-1.0;-0.8	Rejected binding international legal ruling	I	D	M	E
16	M	-0.8;-0.6	Assassinated prominent figures	D	I	M	E
17	E	-0.8;-0.6	Neutralised health system	D	E	M	I
18	E	-0.8;-0.6	Displaced population	D	I	E	M
19	E	-0.8;-0.6	Organised crime severely escalated	D	I	M	E
20	E	-0.8;-0.6	Targeted humanitarian intervention conducted in specific areas	D	E	I	M
21	E	-0.8;-0.6	Suffered severe resource crisis with international mitigation	D	I	E	M
22	E	-0.8;-0.6	Suffered severe national economic recession	E	D	I	M
23	E	-0.8;-0.6	Established partial economic sanctions	E	D	I	M
24	E	-0.8;-0.6	Widely neutralised communications	I	D	M	E
25	E	-0.8;-0.6	Sporadically recovered assets	I	D	M	E
26	E	-0.8;-0.6	Destroyed infrastructure or assets	M	D	E	I
27	D	-0.8;-0.6	Registered high rates of localised mortality	M	D	I	E
28	D	-0.6;-0.4	Neutralised diplomatic cooperation	D	I	E	M
29	D	-0.6;-0.4	Weakened international alliances	D	I	E	M
30	E	-0.6;-0.4	Recurrently reported death or disappearance of prominent figures	D	I	M	E
31	E	-0.6;-0.4	Compromised health system	D	I	E	M
32	E	-0.6;-0.4	Recurrently recorded mobilisation and emigration	D	E	I	M
33	E	-0.6;-0.4	Established widespread organised crime	D	I	M	E
34	E	-0.6;-0.4	Moderately limited humanitarian intervention	D	E	I	M
35	E	-0.6;-0.4	Formalised national economic recession	E	D	I	M
36	I	-0.6;-0.4	Established moderate economic sanctions	E	D	I	M
37	I	-0.6;-0.4	Disseminated internal disinformation	I	D	M	E
38	I	-0.6;-0.4	Leaked sensitive information	I	D	M	E
39	E	-0.6;-0.4	Generalised communications deficiency	I	D	M	E
40	M	-0.6;-0.4	Widely neutralised infrastructure or assets	M	D	E	I
41	D	-0.6;-0.4	Reported or recorded combat zone casualties	M	D	I	E
42	D	-0.4;-0.2	Recorded minimal diplomatic commitment	D	I	E	M
43	E	-0.4;-0.2	Broken bilateral relations	D	I	E	M
44	M	-0.4;-0.2	Eroded social cohesion	D	I	E	M
45	E	-0.4;-0.2	Frequently reported death or disappearance of prominent figures	D	I	E	M
46	E	-0.4;-0.2	Compromised governance	D	E	I	M
47	E	-0.4;-0.2	Recorded frequent emigration	D	I	E	M
48	E	-0.4;-0.2	Provided basic humanitarian assistance	D	E	I	M
49	E	-0.4;-0.2	Experienced widespread national recession	E	D	I	M
50	I	-0.4;-0.2	Established economic sanctions	E	D	I	M
51	I	-0.4;-0.2	Recorded frequent localised damage to infrastructure or assets	E	D	M	I
52	E	-0.4;-0.2	Frequently disseminated internal disinformation	I	D	M	E
53	I	-0.4;-0.2	Frequently leaked sensitive information	I	D	M	E
54	D	-0.4;-0.2	Established localised organised crime	D	I	M	E
55	M	-0.4;-0.2	Recorded skirmish combat casualties	M	D	I	E
56	M	-0.4;-0.2	Asserted sovereignty	I	D	M	E
57	M	-0.4;-0.2	Occupied strategic territory	M	D	I	E
58	M	-0.4;-0.2	Militarised disputed territory	D	M	E	I
59	D	-0.2;0.0	Experienced diplomatic tension	I	D	M	E
60	D	-0.2;0.0	Reduced diplomatic commitment	D	I	E	M
61	E	-0.2;0.0	Affected political stability	D	E	I	M
62	D	-0.2;0.0	Compromised regional autonomy	D	M	E	I
63	D	-0.2;0.0	Weakened community cohesion	D	I	E	M
64	D	-0.2;0.0	Fluctuating adherence to international regulations	D	I	E	M
65	D	-0.2;0.0	Experienced occasional frictions in international relations	D	I	E	M
66	E	-0.2;0.0	Sporadically reported death or disappearance of prominent figures	D	I	M	E
67	E	-0.2;0.0	Recorded emerging criminality	D	I	M	E
68	E	-0.2;0.0	Recorded emigration	D	I	E	M
69	E	-0.2;0.0	Experienced localised economic recession	E	D	I	M
70	E	-0.2;0.0	Recorded growing economic inequality	E	D	I	M
71	I	-0.2;0.0	Suffered limited community services	E	D	I	M
72	I	-0.2;0.0	Imposed mild economic sanctions	E	D	I	M
73	I	-0.2;0.0	Recorded occasional localised damage to vital targets or assets	E	D	I	M
74	I	-0.2;0.0	Disseminated emerging internal disinformation	I	D	M	E
75	I	-0.2;0.0	Occasionally reported sensitive information leaks	I	D	M	E
76	I	-0.2;0.0	Controlled information with moderate restrictions	I	D	M	E
77	E	-0.2;0.0	Disseminated propaganda focused on nationalism	I	D	M	E
78	I	-0.2;0.0	Eroded media influence on social media platforms (e.g., Facebook, X/Twitter, Instagram)	I	D	E	M
79	I	-0.2;0.0	Recorded skirmish casualties in conflict zones	I	D	M	E
80	I	-0.2;0.0	Slightly limited humanitarian intervention	I	D	E	M
81	D	-0.2;0.0	Recorded localised security increase	M	E	I	D
82	I	-0.2;0.0	Controlled information without full restriction	I	D	M	E
83	I	-0.2;0.0	Information disseminated with a focus on disputed strategic territories	I	D	M	E
84	D	-0.2;0.0	Delegitimised external actors	D	I	M	E
85	D	-0.2;0.0	Undermined multilateral codes of conduct and legal frameworks	D	I	E	M
86	M	-0.2;0.0	Increased armament capacity	I	D	E	M
87	M	-0.2;0.0	Increased nuclear armament capacity	M	D	I	E
88	M	-0.2;0.0	Intimidated foreign military presence	I	D	M	E
89	M	-0.2;0.0	Obstructed foreign logistical operations	I	D	M	E
90	E	0.0;0.2	Strengthened regional economic connectivity	E	D	I	M
91	D	0.6;0.8	Agreed diplomatic code of conduct	D	I	M	E
92	D	0.8;1.0	Peaceful settlement of disputes	D	E	I	M

## Sheet: Indicators
ID	Type of Indicator	Effect Indicator
1	Diplomatic	Recognition of the government in exile by international bodies
1	Diplomatic	Diplomatic support from foreign governments
1	Diplomatic	Establishment of embassies or consulates in exile
1	Diplomatic	Formal communication with international organizations
1	Diplomatic	Policy changes by host countries in favour of the exiled government
1	Diplomatic	Alignment of opposition movements with the government in exile
1	Diplomatic	Legal status of the exiled government within the host country
1	Diplomatic	Participation of the government in exile in multilateral diplomacy
1	Diplomatic	Influence of the government in exile on the political discourse
1	Diplomatic	Formation of alliances or coalitions with other exiled governments
1	Economic	Allocation of financial aid to the government in exile
1	Economic	Transfer of economic resources to the government in exile
1	Economic	Economic sanctions lifted or imposed due to the establishment of the government in exile
1	Economic	Investment in the infrastructure of the exile's operations
1	Economic	Impact on trade relations between the host country and the government in exile
1	Economic	Access to international financial institutions by the government in exile
1	Economic	Economic support from host country for exiled population
1	Economic	Establishment of remittances or financial flows from the diaspora
1	Economic	Effect on the financial stability of the government in exile
1	Economic	Economic independence from the homeland's government in exile
1	Military	Establishment of military alliances to support the government in exile
1	Military	Training and provision of resources to military forces loyal to the exiled government
1	Military	Deployment of military forces to protect the government in exile
1	Military	Presence of military bases or safe zones for the exiled government
1	Military	Influence of the exiled government on armed conflict strategies
1	Military	Military interventions by host country to defend the exiled government
1	Military	Provision of military equipment to forces loyal to the exiled government
1	Military	Use of media to rally military support for the exiled government
1	Military	Establishment of strategic military operations by the government in exile
1	Military	Coordination of military operations with international allies
1	Informational	Increase in international media coverage of the government in exile
1	Informational	Use of propaganda by the government in exile to maintain legitimacy
1	Informational	Distribution of news or information about the government in exile through foreign media
1	Informational	Growth of online platforms supporting the government in exile
1	Informational	Campaigns to influence public opinion in support of the exiled government
1	Informational	Establishment of official communication channels between the exiled government and the public
1	Informational	Use of social media to enhance visibility of the government in exile
1	Informational	Increase in the number of exiled government spokespersons or representatives
1	Informational	Creation of a public narrative about the legitimacy and rights of the exiled government
1	Informational	Use of international forums to promote the message of the government in exile
2	Diplomatic	Declarations of emergency or martial law
2	Diplomatic	Government involvement in health system restructuring
2	Diplomatic	Allocation of international aid for healthcare recovery
2	Diplomatic	Reforms in healthcare laws or policies post-collapse
2	Diplomatic	Public trust in government response to health crisis
2	Diplomatic	Establishment of international health coalitions
2	Diplomatic	Coordination between government and health NGOs
2	Diplomatic	Adjustment of governmental priorities to address health collapse
2	Diplomatic	Leadership changes in health ministries
2	Diplomatic	Political backlash or protests related to healthcare collapse
2	Economic	Increased government spending on healthcare recovery
2	Economic	Changes in healthcare sector employment
2	Economic	Reduction in public health funding
2	Economic	Economic impact of healthcare infrastructure rebuilding
2	Economic	Changes in pharmaceutical market dynamics
2	Economic	Fluctuations in health insurance premiums
2	Economic	Shifts in medical supply chain management
2	Economic	Funding for emergency health services
2	Economic	Government borrowing to finance health system recovery
2	Economic	Growth in private health investments post-collapse
2	Military	Deployment of military resources to support health services
2	Military	Military intervention to maintain order in healthcare facilities
2	Military	Provision of military healthcare units in crisis zones
2	Military	Use of military infrastructure to house health services
2	Military	Militarisation of health resources and supplies
2	Military	Security of healthcare infrastructure by military forces
2	Military	Coordination of military and civilian medical efforts
2	Military	Establishment of military hospitals for emergency care
2	Military	Emergency evacuation operations by military forces
2	Military	Use of military air assets for transporting medical supplies
2	Informational	Spread of information on healthcare system status via media
2	Informational	Public communication campaigns to restore trust in health services
2	Informational	Reports on healthcare collapse and recovery by international media
2	Informational	Online platforms reporting on healthcare shortages
2	Informational	Use of social media to coordinate relief efforts
2	Informational	Government updates on healthcare system recovery progress
2	Informational	Analysis of health system failures and responses in news
2	Informational	Government propaganda to promote health system recovery
2	Informational	Disinformation campaigns related to health system collapse
2	Informational	Use of international media to expose health system failures
3	Diplomatic	Recognition of displaced population by international bodies
3	Diplomatic	Government policy changes to accommodate displaced persons
3	Diplomatic	International agreements on refugee resettlement
3	Diplomatic	Shifts in national borders due to displaced population
3	Diplomatic	Changes in immigration laws to manage displaced persons
3	Diplomatic	Diplomatic negotiations for refugee-hosting agreements
3	Diplomatic	Creation of new refugee camps or settlements
3	Diplomatic	Government’s participation in international humanitarian relief
3	Diplomatic	Political unrest due to the arrival of displaced populations
3	Diplomatic	Pressure from international organisations to protect displaced populations
3	Economic	Increase in government spending on refugee support programs
3	Economic	Shifts in local labour markets due to the influx of displaced people
3	Economic	Impact on housing markets due to refugee settlement
3	Economic	Decrease in local GDP due to strain on public services
3	Economic	Rise in remittances sent back by displaced populations
3	Economic	Impact on healthcare and education systems due to population displacement
3	Economic	Increase in humanitarian aid directed at displaced populations
3	Economic	Economic aid allocated for refugee camps or settlements
3	Economic	Employment rate changes due to the integration of displaced persons
3	Economic	Financial aid from international organizations to host countries
3	Military	Deployment of military forces to secure refugee camps
3	Military	Provision of military logistics for displaced population support
3	Military	Military operations to ensure safe passage for displaced populations
3	Military	Establishment of military-controlled zones for displaced persons
3	Military	Use of military medical units to support refugee populations
3	Military	Security operations to prevent unrest or violence in displaced areas
3	Military	Deployment of peacekeeping forces to manage displaced population areas
3	Military	Security of transportation routes for displaced persons
3	Military	Coordination between military and humanitarian organisations for displaced population relief
3	Military	Use of military assets to provide shelter and resources for displaced persons
3	Informational	International media coverage of the displaced population crisis
3	Informational	Use of social media to raise awareness about displacement
3	Informational	Dissemination of refugee stories and their plight through news outlets
3	Informational	Public campaigns to generate support for displaced populations
3	Informational	Government and NGO collaboration in information-sharing about refugees
3	Informational	Official statements on the status of displaced persons from governments
3	Informational	Reporting on the challenges faced by displaced populations in host countries
3	Informational	Use of media to highlight the humanitarian response to displacement
3	Informational	Misinformation or disinformation about displaced persons shared in media
3	Informational	Public debate in media on the long-term solutions for displaced populations
4	Diplomatic	International recognition of the humanitarian intervention
4	Diplomatic	Diplomatic negotiations for intervention authorization
4	Diplomatic	Shifts in national foreign policy regarding intervention
4	Diplomatic	International treaties or agreements on humanitarian actions
4	Diplomatic	Pressure from international bodies to limit scope of intervention
4	Diplomatic	National government statements on the limits of intervention
4	Diplomatic	Changes in national legislation regarding humanitarian aid
4	Diplomatic	Political debates about the scope and duration of intervention
4	Diplomatic	International criticism or support for the intervention
4	Diplomatic	Changes in alliances or political dynamics due to intervention
4	Economic	Increase in international financial aid for humanitarian efforts
4	Economic	Shifts in local economic conditions due to limited intervention
4	Economic	Investment in emergency infrastructure by host country
4	Economic	Impact on local businesses due to intervention restrictions
4	Economic	Allocation of resources for humanitarian relief programs
4	Economic	Increase in employment in humanitarian sectors
4	Economic	Changes in local taxation to fund humanitarian relief
4	Economic	Impact on inflation and currency stability due to intervention
4	Economic	Disruption to local markets due to limited intervention
4	Economic	Financial aid for resettlement programs for affected populations
4	Military	Deployment of military forces with limited mandate
4	Military	Coordination between military forces and humanitarian agencies
4	Military	Security operations to ensure limited scope of intervention
4	Military	Use of military logistics to deliver humanitarian aid
4	Military	Establishment of controlled zones for intervention operations
4	Military	Provision of military medical assistance with limited involvement
4	Military	Deployment of peacekeeping forces under strict mandates
4	Military	Monitoring and controlling supply chains to prevent exploitation
4	Military	Protection of aid convoys and humanitarian assets
4	Military	Training local security forces to manage humanitarian aid
4	Informational	Media coverage of the intervention’s limited scope
4	Informational	Public statements on the humanitarian limits of the intervention
4	Informational	Use of media to clarify the objectives of the intervention
4	Informational	Reporting on humanitarian successes and limitations
4	Informational	Public discourse on the ethical implications of the intervention
4	Informational	International NGO statements on intervention effectiveness
4	Informational	Use of social media to raise awareness about humanitarian intervention
4	Informational	Government communication to inform the public about intervention goals
4	Informational	Highlighting challenges and constraints faced during intervention
4	Informational	Reporting on the positive impacts and criticisms of intervention
5	Diplomatic	International responses to the assassination of prominent figures
5	Diplomatic	Changes in national leadership following repeated assassinations
5	Diplomatic	Shifts in government policies due to the assassinations
5	Diplomatic	Political unrest or mobilization following assassinations
5	Diplomatic	International condemnation or support for the assassination
5	Diplomatic	Investigations or commissions created to address the assassinations
5	Diplomatic	Changes in national security or protection protocols for officials
5	Diplomatic	Impact on diplomatic relations due to assassinations
5	Diplomatic	Political movements or parties emerging in response to assassinations
5	Diplomatic	Legislative changes to increase security or address political violence
5	Economic	Impact on national or local economies following prominent assassinations
5	Economic	Decrease in foreign investment due to political instability from assassinations
5	Economic	Impact on tourism or local business following high-profile assassinations
5	Economic	Increase in government spending on security measures after assassinations
5	Economic	Impact on public sector budgets due to security or response measures
5	Economic	Insurance market fluctuations due to political violence
5	Economic	Impact on international trade due to instability from assassinations
5	Economic	Economic sanctions or trade restrictions imposed due to political violence
5	Economic	Changes in local markets or industries affected by the assassination
5	Economic	Increase in employment for security personnel after repeated assassinations
5	Military	Military deployment to secure areas following the assassination of figures
5	Military	Use of military intelligence to prevent further assassinations
5	Military	Deployment of special forces to investigate or secure the aftermath
5	Military	Increase in military presence in politically unstable regions
5	Military	Use of military units to protect political leaders and officials
5	Military	Operations targeting perpetrators or groups responsible for assassinations
5	Military	Coordination between military and law enforcement agencies in response
5	Military	Training of military personnel to prevent political violence and assassinations
5	Military	Use of military technology to monitor and protect prominent figures
5	Military	Peacekeeping operations in regions impacted by political violence
5	Informational	Media coverage of the assassination of prominent figures
5	Informational	Public debates and discussions on political violence in the media
5	Informational	Use of social media to raise awareness of assassinations and political instability
5	Informational	Government statements and propaganda following assassinations
5	Informational	Dissemination of information regarding the motives behind the assassinations
5	Informational	Misinformation or disinformation spread about the assassinations
5	Informational	Use of media to report on political unrest after assassinations
5	Informational	International media's framing of the assassinations and their causes
5	Informational	Campaigns to protect political figures or respond to threats
5	Informational	Official public briefings and press conferences after assassinations
6	Diplomatic	International calls for reform of the humanitarian system
6	Diplomatic	Changes in national policies to address the humanitarian breakdown
6	Diplomatic	Pressure on governments to restore or improve humanitarian aid
6	Diplomatic	Creation of new international frameworks to address humanitarian failures
6	Diplomatic	Changes in political leadership or accountability for humanitarian system failures
6	Diplomatic	International debates on the effectiveness of the humanitarian system
6	Diplomatic	Shifts in alliances or diplomatic relations due to humanitarian crisis
6	Diplomatic	International sanctions or pressures related to the humanitarian breakdown
6	Diplomatic	Increase in political protests or social unrest due to the humanitarian system failure
6	Diplomatic	Creation of emergency governance structures to replace broken systems
6	Economic	Increase in financial aid for humanitarian relief efforts
6	Economic	Shifts in foreign aid distribution due to humanitarian system collapse
6	Economic	Changes in economic policies to address the humanitarian needs
6	Economic	Economic impact on local markets due to disrupted humanitarian aid
6	Economic	Increase in humanitarian aid directed at regions affected by the system failure
6	Economic	Decrease in local GDP due to inefficiency in the humanitarian system
6	Economic	Impact on employment due to humanitarian aid shortages
6	Economic	Financial crisis or recession triggered by the breakdown of the humanitarian system
6	Economic	Impact of the failure on local infrastructure and recovery efforts
6	Economic	Economic support from international organizations to rebuild the humanitarian system
6	Military	Deployment of military forces to assist in humanitarian relief efforts
6	Military	Use of military logistics to deliver aid when humanitarian systems fail
6	Military	Military operations to restore order and secure aid distribution
6	Military	Establishment of military-controlled zones for aid delivery
6	Military	Deployment of peacekeeping forces to protect aid convoys and distribution points
6	Military	Use of military medical units to support humanitarian efforts
6	Military	Security operations to prevent looting or violence during humanitarian breakdown
6	Military	Coordination between military forces and international humanitarian organizations
6	Military	Use of military units to restore order in refugee or displaced persons camps
6	Military	Protection of key infrastructure critical to the delivery of humanitarian aid
6	Informational	International media coverage of the humanitarian system’s breakdown
6	Informational	Use of social media to raise awareness of humanitarian system failures
6	Informational	Media reporting on the inefficiencies and corruption within the humanitarian system
6	Informational	Public campaigns to rally support for restoring the humanitarian system
6	Informational	Government and NGO statements on the status of humanitarian aid
6	Informational	Reporting on the needs and suffering of affected populations due to system failure
6	Informational	Use of media to criticize or highlight the shortcomings of the humanitarian response
6	Informational	International NGOs' media campaigns on humanitarian failures
6	Informational	Official government statements on steps being taken to fix the humanitarian system
6	Informational	Misinformation or disinformation spread about humanitarian aid efforts
7	Diplomatic	International calls for economic reforms following collapse
7	Diplomatic	Changes in national leadership due to the economic collapse
7	Diplomatic	Political instability resulting from the economic collapse
7	Diplomatic	Implementation of emergency measures by the government to address the crisis
7	Diplomatic	International sanctions or pressures due to economic collapse
7	Diplomatic	Creation of international economic assistance frameworks
7	Diplomatic	National debates about the causes and solutions to the economic collapse
7	Diplomatic	Shifts in government policies regarding fiscal and monetary management
7	Diplomatic	Diplomatic negotiations for financial aid or debt restructuring
7	Diplomatic	Impact of the economic collapse on national sovereignty or political power
7	Economic	Severe decline in national GDP due to the economic collapse
7	Economic	Unemployment surge as a result of economic downturn
7	Economic	Inflation or hyperinflation triggered by economic collapse
7	Economic	Increase in poverty and inequality due to economic failure
7	Economic	Collapse of the banking system and financial institutions
7	Economic	Decrease in foreign investment and capital flight
7	Economic	Disruption in trade and international business operations
7	Economic	Cuts in government spending leading to reduced public services
7	Economic	Increase in humanitarian aid directed at economic recovery
7	Economic	Restructuring of the national economy with international support
7	Military	Military involvement in securing economic infrastructure during collapse
7	Military	Use of military forces to maintain order and prevent civil unrest
7	Military	Deployment of military forces to safeguard key industries and resources
7	Military	Military operations to protect financial institutions or banks
7	Military	Use of military logistics to support economic recovery programs
7	Military	Coordination between military and governmental bodies for economic stabilization
7	Military	Use of military intelligence to monitor economic vulnerabilities and recovery
7	Military	Deployment of peacekeeping forces to maintain social order during economic collapse
7	Military	Restoration of vital infrastructure by military engineering units
7	Military	Use of military to ensure the security of humanitarian and economic aid routes
7	Informational	Media coverage of the economic collapse and its causes
7	Informational	Public debates on economic policies and the government’s role in the collapse
7	Informational	International media’s portrayal of the country’s economic crisis
7	Informational	Government statements about the steps taken to address the economic collapse
7	Informational	Media reports on the impact of economic collapse on daily life and citizens
7	Informational	Public campaigns to explain economic reforms and recovery plans
7	Informational	Dissemination of information on international aid and economic recovery efforts
7	Informational	Use of social media to organize protests or support for economic reforms
7	Informational	Misinformation or disinformation spread regarding the causes of the economic collapse
7	Informational	Media coverage of government accountability in the economic collapse
8	Diplomatic	International diplomatic efforts to impose economic sanctions
8	Diplomatic	Changes in national policies in response to economic sanctions
8	Diplomatic	International support or opposition for the imposed sanctions
8	Diplomatic	National government’s statements on the impact of sanctions
8	Diplomatic	Political unrest or protests within the country due to sanctions
8	Diplomatic	Diplomatic negotiations for the reduction or removal of sanctions
8	Diplomatic	Shifts in foreign policy due to the imposed sanctions
8	Diplomatic	Creation of alternative economic partnerships to circumvent sanctions
8	Diplomatic	Impact on national sovereignty due to international sanctions
8	Diplomatic	Changes in leadership or policy reforms to address sanctions
8	Economic	Decrease in national GDP as a result of imposed sanctions
8	Economic	Severe inflation or currency devaluation due to sanctions
8	Economic	Increase in unemployment as industries face sanctions
8	Economic	Decline in foreign investment due to sanctions
8	Economic	Impact on international trade and exports due to sanctions
8	Economic	Shortages of essential goods and services due to sanctions
8	Economic	Disruption in financial markets or banking system due to sanctions
8	Economic	Decrease in access to international financial systems
8	Economic	Increase in black market or informal economy due to sanctions
8	Economic	Restructuring of the economy to adapt to sanctions
8	Military	Deployment of military forces to secure resources or critical infrastructure affected by sanctions
8	Military	Military operations to protect against external pressures caused by sanctions
8	Military	Use of military intelligence to counteract the effects of economic sanctions
8	Military	Coordination between military and government for economic resilience
8	Military	Deployment of peacekeeping forces to prevent instability caused by sanctions
8	Military	Protection of key industries from foreign economic pressures
8	Military	Training of military forces to manage internal unrest due to economic sanctions
8	Military	Deployment of military logistics to secure essential imports during sanctions
8	Military	Use of military to safeguard critical infrastructure from external influence
8	Military	Operations to monitor and prevent illegal trade as a result of sanctions
8	Informational	Media coverage of the impact of economic sanctions on the country
8	Informational	Public government statements defending or criticizing sanctions
8	Informational	International media portrayal of the country’s struggle with sanctions
8	Informational	Use of social media to organize public reactions to sanctions
8	Informational	Reporting on the humanitarian impact of sanctions on the population
8	Informational	Public campaigns to mitigate the negative effects of sanctions
8	Informational	International NGOs' media campaigns addressing the consequences of sanctions
8	Informational	Use of media to criticize the international community for imposing sanctions
8	Informational	Government propaganda or messaging on how to cope with sanctions
8	Informational	Dissemination of information on sanctions evasion tactics
9	Diplomatic	Government statements or orders to restore communication channels
9	Diplomatic	Changes in national policies due to interrupted communications
9	Diplomatic	International diplomatic efforts to address communication disruptions
9	Diplomatic	Creation of emergency communication frameworks by the government
9	Diplomatic	Impact on international relations due to communication breakdowns
9	Diplomatic	Restrictions on free speech or media due to communication interruption
9	Diplomatic	Changes in political dynamics due to limited access to information
9	Diplomatic	Internal political unrest triggered by communication disruptions
9	Diplomatic	Pressure from international bodies to restore communication channels
9	Diplomatic	National security measures to monitor or control communication flows
9	Economic	Disruption in business operations due to interrupted communications
9	Economic	Impact on foreign trade and financial transactions due to communication failure
9	Economic	Decrease in investment due to uncertainty from communication interruptions
9	Economic	Increase in economic losses due to lack of communication infrastructure
9	Economic	Delay in supply chains and logistics due to communication breakdowns
9	Economic	Impact on the banking sector and financial services from communication failure
9	Economic	Surge in the demand for alternative communication tools or networks
9	Economic	Decline in tourism or local economy due to communication barriers
9	Economic	Increase in government spending to restore communication networks
9	Economic	Use of financial resources for emergency communication systems
9	Military	Deployment of military forces to restore communication networks
9	Military	Use of military logistics to transport communication equipment
9	Military	Coordination between military and civilian authorities to repair infrastructure
9	Military	Deployment of military intelligence to monitor or restore communication
9	Military	Military operations to secure communication infrastructure from sabotage
9	Military	Protection of critical communication hubs by military units
9	Military	Use of military technology to re-establish secure communication lines
9	Military	Operations to prevent misinformation or disruption of communications
9	Military	Training military personnel to handle communication restoration efforts
9	Military	Deployment of peacekeeping forces to maintain order during communication breakdowns
9	Informational	Media coverage of the communication breakdown and its effects
9	Informational	Government communication on the status of communication restoration
9	Informational	Use of social media to report on the communication disruption
9	Informational	International media’s portrayal of the communication interruption
9	Informational	Dissemination of government plans for restoring communication systems
9	Informational	Media reports on the societal impact of communication breakdowns
9	Informational	Use of alternative communication platforms to bypass interruption
9	Informational	Public campaigns to promote awareness of communication restoration efforts
9	Informational	Disinformation or confusion spread due to lack of official communication
9	Informational	International NGO efforts to provide information during communication failures
10	Diplomatic	Changes in national policies regarding asset recovery
10	Diplomatic	International cooperation agreements for asset recovery
10	Diplomatic	Increase in government efforts to recover stolen or laundered assets
10	Diplomatic	Political debates on the effectiveness of asset recovery programs
10	Diplomatic	National government statements on the recovery of assets
10	Diplomatic	Creation of new international frameworks for asset recovery
10	Diplomatic	Impact of asset recovery on foreign relations and diplomacy
10	Diplomatic	Pressure from international organizations to recover assets
10	Diplomatic	Legal reforms to facilitate asset recovery and prevent corruption
10	Diplomatic	Shifts in political leadership due to asset recovery efforts
10	Economic	Increase in national revenues from recovered assets
10	Economic	Impact on financial markets due to recovered assets
10	Economic	Redistribution of recovered assets to public services or development programs
10	Economic	Changes in local industries as a result of asset recovery programs
10	Economic	Increase in foreign investment due to improved financial transparency
10	Economic	Impact on local businesses from the return of illicitly acquired assets
10	Economic	Decrease in the informal or underground economy due to asset recovery
10	Economic	Increase in public spending on welfare programs using recovered assets
10	Economic	Shift in economic priorities due to the inflow of recovered assets
10	Economic	Financial aid or grants for asset recovery initiatives
10	Military	Deployment of military forces to secure recovered assets
10	Military	Use of military logistics to transport or protect recovered assets
10	Military	Coordination between military and law enforcement to facilitate asset recovery
10	Military	Protection of key facilities involved in asset recovery efforts
10	Military	Use of military intelligence to track and recover assets
10	Military	Deployment of peacekeeping forces to safeguard recovered assets
10	Military	Training military personnel to assist in asset recovery operations
10	Military	Establishment of military-controlled zones for the storage of recovered assets
10	Military	Use of military resources to prevent theft or misuse of recovered assets
10	Military	Monitoring and securing transport routes for recovered assets
10	Informational	Media coverage of asset recovery successes and challenges
10	Informational	Public government statements on recovered assets and their use
10	Informational	Use of social media to raise awareness about asset recovery efforts
10	Informational	International media's portrayal of the asset recovery process
10	Informational	Reporting on the impact of asset recovery on local communities
10	Informational	Government campaigns to encourage public trust in asset recovery initiatives
10	Informational	International NGO statements on the transparency of asset recovery efforts
10	Informational	Dissemination of information regarding the legal framework of asset recovery
10	Informational	Misinformation or disinformation about the process of asset recovery
10	Informational	Use of media to highlight the challenges of recovering illicit assets
11	Diplomatic	Changes in national leadership following the elimination of dissidents
11	Diplomatic	Creation of new laws or policies to target dissent
11	Diplomatic	International condemnation or support for actions against dissidents
11	Diplomatic	Impact on national political stability due to dissident elimination
11	Diplomatic	Changes in public opinion or political mobilization following the elimination of dissidents
11	Diplomatic	Increase in government control over media and political discourse
11	Diplomatic	Shift in diplomatic relations due to actions against dissidents
11	Diplomatic	Impact on freedom of speech and civil rights in the country
11	Diplomatic	National and international legal proceedings related to the dissident elimination
11	Diplomatic	Increased surveillance and restriction of opposition activities
11	Economic	Impact on foreign investment due to political repression
11	Economic	Decrease in local economic activity due to political instability caused by dissident elimination
11	Economic	Increase in government spending on security and surveillance measures
11	Economic	Shifts in labor markets due to the suppression of political opposition
11	Economic	Changes in the public sector budget to support political repression
11	Economic	Decline in economic performance due to international sanctions or boycotts
11	Economic	Increase in black market or underground economic activity in response to repression
11	Economic	Financial flows directed towards security agencies rather than economic development
11	Economic	Impact on local businesses due to the fear of political retaliation
11	Economic	Reduction in tourism and international trade due to political climate
11	Military	Deployment of military forces to suppress dissent and maintain control
11	Military	Use of military intelligence to track and eliminate dissidents
11	Military	Increase in military involvement in domestic political matters
11	Military	Deployment of special forces to neutralize dissident groups
11	Military	Coordination between military and law enforcement to eliminate dissidents
11	Military	Use of military equipment and technology to monitor or eliminate dissent
11	Military	Operation of military-controlled detention centers for dissidents
11	Military	Use of military medical units in politically motivated repression
11	Military	Deployment of peacekeeping forces to control internal unrest
11	Military	Use of military logistics to control or restrict dissident movements
11	Informational	Media coverage of the elimination of dissidents and government justification
11	Informational	Dissemination of government messages defending actions against dissidents
11	Informational	International media’s portrayal of government repression
11	Informational	Use of social media by the government to legitimize actions against dissidents
11	Informational	Public campaigns to demonize dissidents and justify their elimination
11	Informational	Use of media to suppress opposition voices and portray them as enemies
11	Informational	International NGO criticism of government actions against dissidents
11	Informational	Reports on the human rights violations associated with dissident elimination
11	Informational	Use of propaganda to foster public support for the elimination of dissent
11	Informational	Censorship of independent media reporting on dissident issues
12	Diplomatic	International condemnation or support for the destruction of infrastructure
12	Diplomatic	Creation of post-destruction rebuilding frameworks or agreements
12	Diplomatic	Shifts in national policies regarding the reconstruction of infrastructure
12	Diplomatic	Impact on national leadership due to the destruction of key assets
12	Diplomatic	Increase in international diplomatic efforts for recovery and aid
12	Diplomatic	National debates on accountability for the destruction of infrastructure
12	Diplomatic	Changes in governance to address infrastructure restoration
12	Diplomatic	Creation of emergency governance structures to manage reconstruction
12	Diplomatic	Political mobilization around the destruction and recovery process
12	Diplomatic	Impact on national sovereignty due to foreign intervention in reconstruction
12	Economic	Severe disruption in national GDP due to destroyed infrastructure and assets
12	Economic	Increase in government spending for the reconstruction of infrastructure
12	Economic	Decrease in foreign investment due to infrastructure destruction
12	Economic	Disruption to local and international trade due to destroyed infrastructure
12	Economic	Increase in unemployment as industries are halted by infrastructure loss
12	Economic	Increase in humanitarian aid and financial support directed at recovery
12	Economic	Financial losses in key industries affected by infrastructure destruction
12	Economic	Shifts in local labor markets due to the demand for rebuilding efforts
12	Economic	Impact on housing markets or commercial real estate due to destroyed assets
12	Economic	Reallocation of national budgets for infrastructure rebuilding programs
12	Military	Deployment of military forces to protect or manage reconstruction sites
12	Military	Use of military logistics to facilitate the transportation of recovery materials
12	Military	Operation of military engineering units to rebuild or repair damaged infrastructure
12	Military	Coordination between military and civilian authorities for infrastructure rebuilding
12	Military	Protection of critical infrastructure from further damage or sabotage
12	Military	Use of military forces for emergency repair of vital infrastructure
12	Military	Deployment of military peacekeeping forces to ensure order during reconstruction
12	Military	Use of military technology to assist in rebuilding or monitoring infrastructure projects
12	Military	Deployment of military personnel for securing transportation routes for recovery efforts
12	Military	Assistance from military in restoring basic services (electricity, water, roads)
12	Informational	Media coverage of the destruction of infrastructure and its consequences
12	Informational	International media's portrayal of the scale of infrastructure destruction
12	Informational	Use of social media to raise awareness of the destruction and its impacts
12	Informational	Government statements on the recovery plans for destroyed infrastructure
12	Informational	Use of media to report on the ongoing recovery and rebuilding efforts
12	Informational	Public campaigns to support reconstruction initiatives
12	Informational	International NGO statements on the challenges of rebuilding destroyed assets
12	Informational	Reporting on the humanitarian and social impacts of destroyed infrastructure
12	Informational	Dissemination of information regarding funding and resource allocation for recovery
12	Informational	Media coverage of the political and economic implications of infrastructure destruction
13	Diplomatic	International pressure to restore social order and governance
13	Diplomatic	Creation of emergency governance structures to manage societal collapse
13	Diplomatic	Shifts in national policies due to social breakdown
13	Diplomatic	Increase in political instability following societal collapse
13	Diplomatic	National debates on the causes and consequences of societal collapse
13	Diplomatic	Changes in leadership due to the collapse of societal structures
13	Diplomatic	International diplomatic responses to address societal collapse
13	Diplomatic	Internal unrest and public protests as a result of societal breakdown
13	Diplomatic	Impact on national security as societal collapse escalates
13	Diplomatic	Use of emergency powers by the government to manage the crisis
13	Economic	Severe economic disruption due to societal collapse
13	Economic	Increase in poverty and inequality as a result of societal breakdown
13	Economic	Disruption of trade and local markets due to social instability
13	Economic	Surge in government spending on crisis management and recovery
13	Economic	Increase in unemployment due to the collapse of industries and services
13	Economic	Financial collapse or devaluation of the national currency
13	Economic	Decline in foreign investment and international trade due to instability
13	Economic	Increase in informal or underground economic activity as a response to collapse
13	Economic	Impact on public services (health, education) due to societal collapse
13	Economic	Increase in humanitarian aid directed to support the collapsed society
13	Military	Deployment of military forces to maintain order and prevent civil unrest
13	Military	Use of military forces to provide security in collapsed regions
13	Military	Coordination between military and humanitarian agencies during societal collapse
13	Military	Deployment of peacekeeping forces to restore order and stability
13	Military	Provision of military logistics to support the recovery of collapsed societies
13	Military	Protection of key infrastructure from looting or further damage
13	Military	Use of military intelligence to monitor and control unstable areas
13	Military	Training of military personnel to handle internal conflicts and crises
13	Military	Establishment of military-controlled zones for recovery and rebuilding efforts
13	Military	Restoration of essential services by military units in collapsed regions
13	Informational	Media coverage of the societal collapse and its causes
13	Informational	Use of media to report on the humanitarian crisis caused by societal collapse
13	Informational	International media's portrayal of societal breakdown and recovery efforts
13	Informational	Government communication on the steps taken to address the collapse
13	Informational	Use of social media to raise awareness about the collapse and its impacts
13	Informational	Dissemination of recovery plans and actions taken by the government
13	Informational	International NGO statements on the collapse and the need for intervention
13	Informational	Media reporting on public protests and unrest due to societal breakdown
13	Informational	Use of media to generate support for recovery and rebuilding initiatives
13	Informational	Misinformation or disinformation spread during the societal collapse
14	Diplomatic	International calls for action to address the increased mortality rate
14	Diplomatic	Changes in national health policies in response to rising mortality
14	Diplomatic	Government statements regarding the causes of increased mortality
14	Diplomatic	Creation of emergency measures or health systems to reduce mortality
14	Diplomatic	Impact on public trust in the government’s ability to manage health crises
14	Diplomatic	National debates on accountability for the rise in mortality rates
14	Diplomatic	International diplomatic pressure to provide humanitarian assistance
14	Diplomatic	Changes in political leadership or response to the health crisis
14	Diplomatic	Political unrest or protests driven by dissatisfaction with government responses
14	Diplomatic	Use of emergency powers to manage the crisis and control mortality
14	Economic	Increase in government spending on health and emergency services
14	Economic	Impact on the workforce due to the high mortality rate
14	Economic	Financial losses in sectors heavily affected by mortality (e.g., healthcare, agriculture)
14	Economic	Decrease in national productivity due to a loss of human capital
14	Economic	Increase in healthcare costs due to treatment of mortality-related diseases
14	Economic	Disruption to the economy due to the death of key workers or leaders
14	Economic	Increase in humanitarian aid directed at reducing mortality and improving health
14	Economic	Decline in tourism or international business activity due to mortality concerns
14	Economic	Changes in labor markets or industries affected by increased mortality
14	Economic	Reduction in the availability of skilled workers due to high mortality rates
14	Military	Deployment of military forces to assist in healthcare response efforts
14	Military	Use of military logistics to deliver medical supplies and resources to affected areas
14	Military	Deployment of military medical units to provide treatment and prevent further deaths
14	Military	Coordination between military forces and health agencies to address the crisis
14	Military	Protection of health infrastructure and medical personnel from threats
14	Military	Use of military intelligence to track the spread of diseases contributing to mortality
14	Military	Deployment of peacekeeping forces to ensure order in areas affected by high mortality
14	Military	Operation of military-controlled health facilities to manage the crisis
14	Military	Use of military assets for the transportation of medical aid to areas with high mortality
14	Military	Monitoring and securing transportation routes for emergency health services
14	Informational	Media coverage of the increasing mortality rate and its causes
14	Informational	Public government statements on efforts to reduce mortality
14	Informational	Use of media to raise awareness about the health crisis and mortality concerns
14	Informational	International media’s portrayal of the government’s response to increased mortality
14	Informational	Dissemination of health guidelines and preventative measures through media
14	Informational	Reporting on the human toll of the crisis and its impact on communities
14	Informational	Use of social media to spread information about healthcare and mortality
14	Informational	Government communication on healthcare system preparedness to reduce mortality
14	Informational	Public campaigns to encourage health measures and reduce mortality rates
14	Informational	Media coverage of the international response to the mortality crisis
15	Diplomatic	National government’s official statement rejecting the binding international legal ruling
15	Diplomatic	Shifts in national foreign policy in response to the rejection of the international ruling
15	Diplomatic	Increase in diplomatic tensions with countries or organizations supporting the legal ruling
15	Diplomatic	Engagement in international forums to defend the national stance against the legal ruling
15	Diplomatic	National legal reforms or changes to align with the rejection of the international ruling
15	Diplomatic	Formation of political movements or public support for rejecting the binding international ruling
15	Diplomatic	Impact on national credibility and reputation in international legal and diplomatic circles
15	Diplomatic	Changes in bilateral or multilateral relations as a result of rejecting the ruling
15	Diplomatic	International diplomatic protests or calls for sanctions against the country rejecting the ruling
15	Diplomatic	Shifts in domestic public opinion regarding international legal authority and sovereignty
15	Economic	Impact on foreign investment due to concerns over national legal unpredictability and international relations
15	Economic	Changes in trade relations with countries that support the international legal ruling
15	Economic	Increase in national legal costs as a result of prolonged legal disputes and international conflicts
15	Economic	Impact on national economy due to sanctions or economic measures resulting from the rejection of the ruling
15	Economic	Changes in international market perceptions due to the country’s rejection of binding legal rulings
15	Economic	Decrease in bilateral or multilateral trade agreements as a consequence of the ruling rejection
15	Economic	Shifts in financial flows as international institutions respond to the rejection of the legal ruling
15	Economic	Increase in government expenditure to manage the diplomatic and economic fallout from rejecting the ruling
15	Economic	Impact on international financial relations, such as loans or aid, due to legal disputes
15	Military	Increase in military readiness or posture as a response to potential threats arising from rejecting the ruling
15	Military	Coordination between military and diplomatic channels to manage potential escalations from the ruling rejection
15	Military	Deployment of military forces to safeguard national interests or critical infrastructure affected by international tensions
15	Military	Engagement in military operations to protect national sovereignty in response to international legal conflicts
15	Military	Reinforcement of military alliances to counter the potential consequences of the rejected international ruling
15	Military	Use of military diplomacy to manage international relations and prevent conflict resulting from the ruling rejection
15	Military	Deployment of military intelligence resources to monitor foreign reactions to the rejection of the ruling
15	Military	Increase in military cooperation with allied countries to mitigate diplomatic and legal repercussions
15	Military	Surveillance of international borders to prevent potential escalations due to the legal dispute
15	Military	Strengthening of strategic military positions to counter potential risks from the legal dispute
15	Informational	Media coverage of the national government's decision to reject the binding international legal ruling
15	Informational	Dissemination of government statements and justifications for rejecting the ruling to the public
15	Informational	International media portrayal of the country’s rejection of the ruling and its global implications
15	Informational	Reports on the consequences of the rejection on international law and global governance
15	Informational	Use of social media to promote the national government’s stance on the rejection of the ruling
15	Informational	International NGO or legal community reactions to the country’s rejection of the ruling
15	Informational	Use of media to emphasize national sovereignty and legal autonomy in rejecting international rulings
15	Informational	Dissemination of government responses to international criticisms of the rejection
15	Informational	Media portrayal of the domestic debate on the rejection of the legal ruling and its effects on national identity
15	Informational	Use of diplomatic channels and media to manage global public perception regarding the rejected ruling
16	Diplomatic	International reactions to the assassination of prominent figures
16	Diplomatic	Changes in national leadership following the assassination
16	Diplomatic	Political instability due to the assassination of prominent figures
16	Diplomatic	Creation of new laws or policies to address political violence
16	Diplomatic	Impact on national security and governmental response to assassination
16	Diplomatic	Diplomatic pressure or condemnation following high-profile assassinations
16	Diplomatic	Shifts in foreign relations or alliances due to the assassination
16	Diplomatic	Impact on public opinion and political mobilization after an assassination
16	Diplomatic	International investigations or calls for accountability regarding the assassination
16	Diplomatic	Changes in political discourse and media coverage following prominent deaths
16	Economic	Impact on local or national economies due to the assassination of key figures
16	Economic	Decrease in foreign investment following political instability from assassinations
16	Economic	Disruption in national trade and business operations after key figures are targeted
16	Economic	Increase in government spending on security measures to protect leadership
16	Economic	Financial losses in sectors affected by political violence or instability
16	Economic	Impact on tourism and local businesses due to political unrest after assassinations
16	Economic	Increase in humanitarian aid or foreign financial support to stabilize the country
16	Economic	Decline in local GDP due to disruptions caused by the assassination
16	Economic	Shifts in consumer confidence and national spending due to political violence
16	Economic	Increased demand for security and intelligence services in response to assassination
16	Military	Deployment of military forces to ensure national security after assassination
16	Military	Use of military logistics to protect key figures or sites following assassinations
16	Military	Deployment of special forces to investigate or respond to political violence
16	Military	Increase in military presence in areas vulnerable to political unrest
16	Military	Operations to protect political leaders and government institutions from further harm
16	Military	Use of military intelligence to prevent further assassinations or threats
16	Military	Coordination between military and law enforcement in response to political violence
16	Military	Deployment of peacekeeping forces to stabilize regions affected by the assassination
16	Military	Use of military technology to monitor and secure public figures and infrastructure
16	Military	Restoration of order through military operations following high-profile assassinations
16	Informational	Media coverage of the assassination and its political implications
16	Informational	Public government statements on the assassination and its aftermath
16	Informational	Use of social media to spread information about the assassination and its causes
16	Informational	International media’s framing of the assassination and its political consequences
16	Informational	Use of media to raise awareness of the national response to the assassination
16	Informational	Dissemination of government narratives and justifications for actions after the assassination
16	Informational	Public campaigns to garner support for security measures or leadership
16	Informational	International NGO responses to the assassination and its impacts on civil liberties
16	Informational	Reports on the emotional and social impacts of the assassination on society
16	Informational	Misinformation or disinformation spread through media outlets regarding the assassination
17	Diplomatic	International calls for action to restore the health system
17	Diplomatic	Creation of emergency health frameworks or agreements to address the crisis
17	Diplomatic	National government statements on the collapse or neutralisation of the health system
17	Diplomatic	Shifts in national health policies to rebuild or manage the collapse
17	Diplomatic	International support or condemnation due to the health system breakdown
17	Diplomatic	Political unrest or mobilization as a result of the healthcare crisis
17	Diplomatic	Changes in political leadership or accountability for the collapse of the health system
17	Diplomatic	Impact on diplomatic relations due to the failure of the health system
17	Diplomatic	Implementation of emergency governance measures to manage the health system crisis
17	Diplomatic	Legislative changes to facilitate the recovery of the health sector
17	Economic	Severe economic impact due to the collapse of the health system
17	Economic	Increase in government spending on emergency health services and rebuilding
17	Economic	Decline in national productivity due to loss of functioning healthcare services
17	Economic	Increase in unemployment in the healthcare sector as a result of system breakdown
17	Economic	Shifts in public and private healthcare funding to emergency response
17	Economic	Disruption to local and national economies due to healthcare inaccessibility
17	Economic	Increase in informal healthcare systems or underground medical services
17	Economic	Impact on other industries (e.g., pharmaceuticals, healthcare-related businesses) due to system collapse
17	Economic	Increase in external financial aid for health system recovery
17	Economic	Financial losses in sectors impacted by the collapse of the health system
17	Military	Deployment of military forces to assist in healthcare delivery during the crisis
17	Military	Use of military logistics to deliver medical supplies and resources
17	Military	Deployment of military medical units to provide emergency care
17	Military	Coordination between military and civilian health agencies to address the crisis
17	Military	Protection of key healthcare infrastructure from further destruction
17	Military	Use of military technology to monitor and track the healthcare system collapse
17	Military	Deployment of peacekeeping forces to stabilize regions affected by health system collapse
17	Military	Use of military engineering units to repair or reconstruct healthcare facilities
17	Military	Operation of military-controlled health facilities during system breakdown
17	Military	Restoration of essential services by military units in the health sector
17	Informational	Media coverage of the collapse or neutralisation of the health system
17	Informational	Public government statements on actions taken to address the health crisis
17	Informational	Use of social media to raise awareness of healthcare system failures
17	Informational	International media portrayal of the country’s health crisis and response
17	Informational	Dissemination of information on healthcare system recovery efforts
17	Informational	Reporting on the human impact of the health system collapse on communities
17	Informational	Government communication regarding emergency health measures in place
17	Informational	Public campaigns to promote awareness of the healthcare crisis and recovery plans
17	Informational	International NGO reports on the status and challenges of the health system
17	Informational	Misinformation or disinformation regarding the collapse and recovery of the health system
18	Diplomatic	International recognition of the displaced population by governments
18	Diplomatic	Government policy changes to accommodate displaced persons
18	Diplomatic	International agreements on refugee resettlement and management
18	Diplomatic	Shifts in national borders or territories due to displaced populations
18	Diplomatic	Changes in immigration and asylum laws to manage displaced persons
18	Diplomatic	Diplomatic negotiations for refugee-hosting agreements with other countries
18	Diplomatic	Creation of new refugee camps or settlements by the government
18	Diplomatic	Government’s participation in international humanitarian relief efforts
18	Diplomatic	Political unrest or instability due to the arrival of displaced populations
18	Diplomatic	Pressure from international organizations to ensure the protection of displaced populations
18	Economic	Increase in government spending on refugee support and integration programs
18	Economic	Shifts in local labor markets due to the influx of displaced populations
18	Economic	Impact on housing markets and infrastructure due to the arrival of displaced persons
18	Economic	Decrease in local GDP due to the strain on public services caused by displaced populations
18	Economic	Rise in remittances sent back to home countries by displaced populations
18	Economic	Impact on healthcare and education systems due to the influx of displaced persons
18	Economic	Increase in humanitarian aid directed at displaced populations
18	Economic	Economic aid allocated for the construction and maintenance of refugee camps or settlements
18	Economic	Changes in local employment rates as displaced populations are integrated into the workforce
18	Economic	Financial aid from international organizations to host countries dealing with displaced populations
18	Military	Deployment of military forces to provide security and support for displaced populations
18	Military	Provision of military logistics to support the relocation of displaced persons
18	Military	Military operations to ensure the safe passage of displaced persons to safe zones
18	Military	Establishment of military-controlled zones for displaced persons to ensure order
18	Military	Use of military medical units to provide healthcare support to displaced populations
18	Military	Security operations to prevent unrest or violence in camps or settlements
18	Military	Deployment of peacekeeping forces to manage areas affected by large numbers of displaced persons
18	Military	Provision of security for transportation routes and refugee camps
18	Military	Coordination between military and humanitarian organizations for effective relief efforts
18	Military	Use of military assets to provide shelter, food, and resources for displaced persons
18	Informational	International media coverage of the displaced population crisis and its effects
18	Informational	Use of social media to raise awareness about the displacement crisis
18	Informational	Dissemination of personal stories of displaced persons through news outlets
18	Informational	Public campaigns to generate support and solidarity for displaced populations
18	Informational	Collaboration between government and NGOs in sharing information about refugees
18	Informational	Official statements on the status of displaced persons and government actions
18	Informational	Reporting on the challenges faced by displaced populations in host countries
18	Informational	Use of media to highlight the humanitarian response to the displacement crisis
18	Informational	Misinformation or disinformation about the displaced population shared in media
18	Informational	Public debate in media on long-term solutions for displaced populations
19	Diplomatic	Changes in national policies to combat organized crime
19	Diplomatic	Increase in government enforcement powers to address rising crime levels
19	Diplomatic	Shifts in diplomatic relations with neighboring countries due to organized crime escalation
19	Diplomatic	Creation of new laws or frameworks to counter organized crime activities
19	Diplomatic	National government statements on the escalation of organized crime
19	Diplomatic	Political unrest or instability linked to organized crime violence
19	Diplomatic	International cooperation or pressure to address organized crime
19	Diplomatic	Political debates on the causes and consequences of organized crime escalation
19	Diplomatic	Impact on national sovereignty as organized crime groups gain power
19	Diplomatic	Changes in political leadership or accountability related to the organized crime crisis
19	Economic	Increase in government spending on law enforcement and anti-crime measures
19	Economic	Impact on local businesses due to organized crime activities (extortion, theft, etc.)
19	Economic	Decrease in foreign investment as a result of growing criminal activities
19	Economic	Shifts in labor markets due to criminal groups influencing or controlling sectors
19	Economic	Increase in costs of doing business as companies are forced to pay protection money
19	Economic	Disruption in national trade and commerce due to organized crime’s influence
19	Economic	Increase in illegal markets and black market activities in response to organized crime
19	Economic	Financial losses in key sectors due to extortion, smuggling, and theft
19	Economic	Reduction in tax revenue as organized crime undermines legitimate businesses
19	Economic	Financial aid or resources allocated for combating organized crime's economic impact
19	Military	Deployment of military forces to combat organized crime syndicates
19	Military	Use of military intelligence to track and dismantle criminal networks
19	Military	Deployment of special forces to target and neutralize high-level criminal figures
19	Military	Coordination between military and law enforcement to combat organized crime
19	Military	Use of military logistics to assist in crime control operations
19	Military	Deployment of peacekeeping forces to maintain order in crime-affected regions
19	Military	Restoration of order in conflict zones heavily impacted by organized crime
19	Military	Monitoring and securing transportation routes to prevent organized crime activities
19	Military	Establishment of military-controlled zones to restrict organized crime operations
19	Military	Training military personnel to counteract organized crime and its effects
19	Informational	Media coverage of the escalating organized crime and its impact on society
19	Informational	Use of social media to spread awareness of organized crime violence and activities
19	Informational	International media’s portrayal of the impact of organized crime on national security
19	Informational	Government public statements on efforts to curb the escalation of organized crime
19	Informational	Reporting on the humanitarian and social consequences of organized crime escalation
19	Informational	Dissemination of information on anti-crime initiatives and law enforcement successes
19	Informational	Use of media to expose the methods and reach of organized crime syndicates
19	Informational	International NGO statements on the effects of organized crime on vulnerable populations
19	Informational	Use of media to highlight the role of organized crime in political corruption
19	Informational	Misinformation or disinformation regarding organized crime activities spread through media
20	Diplomatic	International recognition of the targeted humanitarian intervention
20	Diplomatic	Government statements on the scope and objectives of the targeted humanitarian intervention
20	Diplomatic	Creation of agreements or frameworks for targeted humanitarian efforts
20	Diplomatic	Shifts in national policy to allow specific areas for humanitarian intervention
20	Diplomatic	Political support or opposition for targeted humanitarian operations in specific areas
20	Diplomatic	International diplomatic negotiations for approval of the intervention
20	Diplomatic	National and international legal frameworks supporting the humanitarian intervention
20	Diplomatic	Pressure from international organizations to target specific crisis zones for humanitarian aid
20	Diplomatic	Impact on national security and government response to the intervention
20	Diplomatic	Political mobilization in response to the intervention in targeted areas
20	Economic	Increase in government spending for targeted humanitarian aid programs
20	Economic	Allocation of financial resources to the areas most in need of humanitarian support
20	Economic	Disruption of local economies due to intervention, but improved access to humanitarian aid
20	Economic	Financial aid directed specifically to the targeted areas for recovery and stabilization
20	Economic	Impact on local businesses in the targeted areas due to the presence of humanitarian aid
20	Economic	Shifts in local labor markets due to the influx of aid workers and intervention efforts
20	Economic	Increase in employment in the humanitarian sector in targeted areas
20	Economic	Impact of international aid on local economic growth and recovery in targeted areas
20	Economic	Increase in demand for goods and services in intervention zones due to humanitarian efforts
20	Economic	Restructuring of national budgets to focus on targeted humanitarian priorities
20	Military	Deployment of military forces to assist in securing and facilitating targeted humanitarian efforts
20	Military	Coordination between military forces and humanitarian organizations in intervention areas
20	Military	Use of military logistics to deliver aid to targeted areas
20	Military	Establishment of military-controlled zones to ensure security for humanitarian workers
20	Military	Deployment of peacekeeping forces to maintain stability during humanitarian intervention
20	Military	Use of military medical units to support healthcare delivery in intervention zones
20	Military	Deployment of special forces to protect aid convoys and critical infrastructure in targeted areas
20	Military	Monitoring and securing transportation routes for humanitarian aid in conflict zones
20	Military	Provision of military resources to assist in the reconstruction of affected areas
20	Military	Training local security forces to manage the humanitarian crisis in targeted regions
20	Informational	Media coverage of the targeted humanitarian intervention and its effects
20	Informational	Use of social media to raise awareness about the targeted humanitarian intervention
20	Informational	Government communication regarding the aims and success of the intervention
20	Informational	International media’s portrayal of the targeted areas receiving humanitarian aid
20	Informational	Reporting on the positive impacts and challenges faced during the targeted intervention
20	Informational	Dissemination of information about the humanitarian aid delivered to specific areas
20	Informational	Public campaigns to encourage donations and support for targeted humanitarian efforts
20	Informational	International NGO reports on the needs of the targeted areas and the effectiveness of aid
20	Informational	Use of media to highlight the role of humanitarian organizations in crisis zones
20	Informational	Misinformation or disinformation spread regarding the effectiveness of the intervention
21	Diplomatic	International diplomatic efforts to mitigate the resource crisis
21	Diplomatic	Creation of international aid agreements to address the resource crisis
21	Diplomatic	Shifts in national policies to manage the resource crisis and international support
21	Diplomatic	Political debates on the causes and solutions to the resource crisis
21	Diplomatic	Government statements on the state of the resource crisis and mitigation efforts
21	Diplomatic	Impact on national sovereignty as international aid and intervention are required
21	Diplomatic	National and international legal frameworks supporting resource crisis mitigation
21	Diplomatic	International organizations’ pressure to implement specific resource crisis measures
21	Diplomatic	Changes in government leadership or accountability in response to the crisis
21	Diplomatic	Political mobilization to address the resource crisis and international mitigation efforts
21	Economic	Increase in international financial aid directed towards the resource crisis
21	Economic	Changes in national budget allocation to address the resource shortages
21	Economic	Increase in government spending on resource management and mitigation efforts
21	Economic	Decrease in national GDP as a result of the resource crisis
21	Economic	Increase in poverty and inequality due to the resource scarcity
21	Economic	Disruption to local industries and agriculture due to lack of resources
21	Economic	Impact on global trade and international relations due to resource shortages
21	Economic	Increase in black market or illegal trade in response to resource shortages
21	Economic	Financial aid and investments allocated for long-term resource sustainability
21	Economic	Financial support for the rebuilding and improvement of resource infrastructure
21	Military	Deployment of military forces to manage or protect scarce resources
21	Military	Coordination between military and international organizations to distribute aid
21	Military	Use of military logistics to transport and secure resources for affected regions
21	Military	Deployment of military personnel to assist in resource allocation and distribution
21	Military	Protection of critical infrastructure, including resource-rich areas, from exploitation
21	Military	Use of military forces to ensure peace and stability in resource-rich regions
21	Military	Restoration of order in regions affected by resource shortages and conflict
21	Military	Deployment of peacekeeping forces to maintain access to resources during crises
21	Military	Use of military intelligence to track and protect critical resource flows
21	Military	Assistance from military engineers to restore resource infrastructure in affected areas
21	Informational	Media coverage of the resource crisis and international mitigation efforts
21	Informational	International media's portrayal of the national resource crisis and recovery efforts
21	Informational	Reporting on government and international efforts to address the resource shortages
21	Informational	Government communication on the state of the resource crisis and mitigation strategies
21	Informational	Use of social media to spread information about resource shortages and mitigation
21	Informational	Dissemination of information on resource rationing or conservation efforts
21	Informational	International NGO statements on the resource crisis and the role of global aid
21	Informational	Media reporting on the humanitarian consequences of the resource crisis
21	Informational	Use of media to raise awareness and generate support for resource crisis relief
21	Informational	Misinformation or disinformation regarding the resource crisis and international aid efforts
22	Diplomatic	International calls for economic recovery and support
22	Diplomatic	Changes in national policies to mitigate the effects of the economic recession
22	Diplomatic	Creation of emergency economic measures by the government
22	Diplomatic	Political unrest or protests due to the economic downturn
22	Diplomatic	National debates on the causes of the economic recession and proposed solutions
22	Diplomatic	Shifts in political leadership due to the economic recession
22	Diplomatic	International diplomatic pressure to implement economic reforms
22	Diplomatic	Changes in foreign policy to attract external economic support or investment
22	Diplomatic	Increase in government efforts to stabilize the national economy
22	Diplomatic	Implementation of austerity measures or fiscal reforms to address the recession
22	Economic	Severe decline in national GDP due to the economic recession
22	Economic	Increase in unemployment rates as a result of economic contraction
22	Economic	Increase in poverty and inequality due to the recession
22	Economic	Disruption in national and international trade caused by economic downturn
22	Economic	Decrease in consumer confidence and spending during the recession
22	Economic	Impact on financial markets and banking systems due to the economic crisis
22	Economic	Decrease in foreign investment due to the uncertain economic environment
22	Economic	Reduction in public services or government spending due to the recession
22	Economic	Increase in government debt as a result of recession-induced spending
22	Economic	Financial aid from international organizations to support economic recovery
22	Military	Deployment of military forces to maintain order in areas affected by the recession
22	Military	Coordination between military and government to prevent social unrest due to economic crisis
22	Military	Deployment of military personnel to secure key economic infrastructure
22	Military	Use of military logistics to provide aid or support during the recession
22	Military	Increase in military presence to stabilize regions heavily impacted by the recession
22	Military	Deployment of peacekeeping forces to manage unrest and instability during the recession
22	Military	Protection of critical industries from theft or sabotage in the economic downturn
22	Military	Monitoring of national borders to prevent illegal trade or smuggling during the recession
22	Military	Use of military technology to support economic recovery operations
22	Military	Assistance from military engineers to restore vital economic infrastructure
22	Informational	Media coverage of the national economic recession and its causes
22	Informational	Use of social media to spread awareness about the economic crisis and government response
22	Informational	Reporting on government actions to mitigate the effects of the recession
22	Informational	Public government statements on the state of the economy and recession management
22	Informational	International media’s portrayal of the national economic crisis and recovery efforts
22	Informational	Media coverage of the social impacts of the economic recession on communities
22	Informational	Dissemination of information on austerity measures and their effects on the population
22	Informational	International NGO reports on the human toll of the national recession
22	Informational	Use of media to encourage public support for economic recovery initiatives
22	Informational	Misinformation or disinformation spread about the causes and recovery from the recession
23	Diplomatic	International diplomatic efforts to implement partial economic sanctions
23	Diplomatic	Shifts in national policy as a response to the partial economic sanctions
23	Diplomatic	Changes in diplomatic relations with countries affected by the sanctions
23	Diplomatic	International support or opposition to the establishment of partial economic sanctions
23	Diplomatic	Creation of legal frameworks or regulations to enforce the sanctions
23	Diplomatic	National government statements explaining the rationale for the partial sanctions
23	Diplomatic	Impact on political stability due to the implementation of partial economic sanctions
23	Diplomatic	Pressure from international bodies or organizations to enforce sanctions
23	Diplomatic	International negotiations to modify or lift the partial sanctions
23	Diplomatic	Impact on national sovereignty due to partial economic sanctions
23	Economic	Decrease in national GDP due to the effects of partial economic sanctions
23	Economic	Impact on trade flows due to restrictions on certain goods or services
23	Economic	Decrease in foreign direct investment due to economic sanctions
23	Economic	Shifts in labor markets due to changes in export or import restrictions
23	Economic	Increase in costs for businesses due to the limited access to foreign markets
23	Economic	Increase in the informal or black market due to economic restrictions
23	Economic	Decrease in local business profitability due to sanctions
23	Economic	Impact on specific sectors (e.g., energy, technology) affected by partial sanctions
23	Economic	Increase in government spending on mitigating the effects of sanctions
23	Economic	Financial aid or support from international organizations to counteract the sanctions
23	Military	Deployment of military forces to protect key assets affected by sanctions
23	Military	Coordination between military and law enforcement to prevent sanctions evasion
23	Military	Use of military intelligence to monitor the impact of economic sanctions
23	Military	Protection of critical infrastructure from foreign influence due to sanctions
23	Military	Deployment of military forces to prevent smuggling or illegal trade in response to sanctions
23	Military	Monitoring of transportation routes to ensure compliance with sanctions
23	Military	Deployment of peacekeeping forces to stabilize regions affected by economic sanctions
23	Military	Use of military assets to support recovery of sectors most affected by sanctions
23	Military	Assistance from military engineers to repair infrastructure damaged by economic sanctions
23	Military	Coordination between military and international organizations to manage sanctions impacts
23	Informational	Media coverage of the establishment and effects of partial economic sanctions
23	Informational	Public government statements on the implementation and goals of the sanctions
23	Informational	International media portrayal of the impact of sanctions on the national economy
23	Informational	Use of media to justify the establishment of partial sanctions and their objectives
23	Informational	Dissemination of information on compliance with sanctions and their enforcement
23	Informational	Reporting on the social and economic consequences of partial sanctions
23	Informational	International NGO reports on the humanitarian impact of economic sanctions
23	Informational	Use of social media to raise awareness and generate support for sanctions
23	Informational	Disinformation or misinformation spread regarding the effectiveness of the sanctions
23	Informational	Media campaigns to inform the public about the necessity and impact of sanctions
24	Diplomatic	International calls for the restoration of communication channels
24	Diplomatic	Changes in national policies to regulate or restore communication systems
24	Diplomatic	Creation of emergency measures or frameworks to manage communication breakdowns
24	Diplomatic	National government statements regarding the neutralisation or interruption of communications
24	Diplomatic	Political unrest or mobilization due to the lack of communications
24	Diplomatic	Impact on national security as communication channels are neutralized
24	Diplomatic	International diplomatic pressure to ensure communication restoration
24	Diplomatic	Shifts in foreign policy to secure communication infrastructure
24	Diplomatic	Changes in government leadership or accountability due to communication failures
24	Diplomatic	Impact on political stability as communications are widely neutralized
24	Economic	Severe disruptions to local and international business due to communication failures
24	Economic	Impact on financial markets and banking systems due to the neutralisation of communications
24	Economic	Increase in government spending to restore communication systems and services
24	Economic	Decline in productivity as industries face communication challenges
24	Economic	Increase in the use of alternative communication systems to bypass neutralisation
24	Economic	Increase in costs for businesses reliant on efficient communication
24	Economic	Disruption in global trade and logistics due to communication breakdown
24	Economic	Increase in informal or black-market communications due to the neutralisation of official systems
24	Economic	Financial losses in sectors reliant on stable communication systems
24	Economic	Changes in national GDP due to the disruption caused by communication systems failure
24	Military	Deployment of military forces to restore or protect communication infrastructure
24	Military	Coordination between military and government to repair and protect communication channels
24	Military	Use of military logistics to provide secure communication systems during breakdowns
24	Military	Establishment of military-controlled communication networks to bypass neutralisation
24	Military	Use of military intelligence to track and mitigate the effects of communication failures
24	Military	Deployment of military medical units to assist in communication within crisis zones
24	Military	Protection of key communication hubs and infrastructure from further neutralisation
24	Military	Deployment of special forces to secure or restore critical communication lines
24	Military	Deployment of peacekeeping forces to maintain order and security during communication failures
24	Military	Use of military technology to re-establish communication systems and secure sensitive data
24	Informational	Media coverage of the neutralisation of communication channels and its consequences
24	Informational	Use of social media to spread awareness about communication breakdowns and impacts
24	Informational	International media portrayal of the effects of communication neutralisation
24	Informational	Reporting on government and international efforts to restore communication systems
24	Informational	Government statements on actions taken to address the communication failures
24	Informational	Use of media to guide the public on alternatives for communication during the crisis
24	Informational	International NGO responses to the communication crisis and their mitigation efforts
24	Informational	Media coverage of the impact of communication neutralisation on societal well-being
24	Informational	Use of media to encourage public resilience and adaptation to communication disruptions
24	Informational	Misinformation or disinformation spread as a result of communication neutralisation
25	Diplomatic	National and international legal frameworks supporting the recovery of sporadically recovered assets
25	Diplomatic	Shifts in national policies or governance structures to facilitate asset recovery
25	Diplomatic	International negotiations and diplomatic efforts to coordinate the recovery of assets
25	Diplomatic	Creation of new agencies or institutions dedicated to recovering sporadically recovered assets
25	Diplomatic	Political debates on the effectiveness and fairness of asset recovery programs
25	Diplomatic	Changes in political leadership or accountability for the mismanagement or slow recovery of assets
25	Diplomatic	Impact on international relations due to the recovery or non-recovery of assets
25	Diplomatic	International support or opposition to national asset recovery efforts
25	Diplomatic	Transparency issues regarding the allocation of recovered assets and their use
25	Diplomatic	National government statements about the sporadic recovery and future asset recovery plans
25	Economic	Increase in financial resources from the sporadic recovery of assets
25	Economic	Decrease in national debt as a result of recovered assets
25	Economic	Reallocation of recovered assets to support national development programs
25	Economic	Increase in government spending due to the need to manage and redistribute recovered assets
25	Economic	Impact on local economies as recovered assets are used for national or local development
25	Economic	Increase in public sector funding as a result of the recovery of previously lost assets
25	Economic	Reduction in corruption or illicit activities due to the sporadic recovery of assets
25	Economic	Shifts in local markets due to the sudden influx of recovered assets
25	Economic	Financial aid from international organizations directed towards improving asset recovery efforts
25	Economic	Impact on businesses and industries as recovered assets are allocated to specific sectors
25	Military	Deployment of military forces to secure or protect recovered assets from theft or sabotage
25	Military	Use of military logistics to transport recovered assets to safe locations
25	Military	Coordination between military forces and law enforcement for securing and protecting assets
25	Military	Protection of key infrastructure and financial institutions involved in asset recovery
25	Military	Deployment of military personnel to ensure the safe handling of recovered assets
25	Military	Use of military intelligence to track and monitor the location of sporadically recovered assets
25	Military	Deployment of peacekeeping forces to ensure the secure transfer of recovered assets
25	Military	Use of military engineering units to restore infrastructure tied to recovered assets
25	Military	Monitoring transportation routes for the safe movement of recovered assets
25	Military	Assistance in auditing or verifying the authenticity and value of sporadically recovered assets
25	Informational	Media coverage of the sporadic recovery of assets and its impact on the economy
25	Informational	Public government statements on the status of asset recovery and allocation
25	Informational	Use of social media to raise awareness about the recovered assets and their impact
25	Informational	International media’s portrayal of the national asset recovery efforts
25	Informational	Dissemination of information about the transparency and distribution of recovered assets
25	Informational	Reports on the challenges and successes of sporadic asset recovery efforts
25	Informational	Use of media to inform the public about the redistribution of recovered assets
25	Informational	International NGO reports on the implications of recovered assets for development
25	Informational	Use of media to highlight the role of international cooperation in asset recovery
25	Informational	Misinformation or disinformation about the recovery and distribution of assets
26	Diplomatic	International condemnation or support for the destruction of infrastructure and assets
26	Diplomatic	Creation of post-destruction rebuilding frameworks or agreements
26	Diplomatic	Shifts in national policies regarding the reconstruction and restoration of infrastructure
26	Diplomatic	Political mobilization around rebuilding efforts following destruction
26	Diplomatic	Impact on national leadership due to the destruction of critical infrastructure
26	Diplomatic	Increase in international diplomatic efforts to provide recovery aid
26	Diplomatic	Changes in governance to prioritize rebuilding efforts and resource allocation
26	Diplomatic	Political debates on the allocation of resources for rebuilding destroyed assets
26	Diplomatic	National government statements on the status and recovery plans for destroyed assets
26	Diplomatic	Shifts in national security policies to protect key infrastructure and prevent future destruction
26	Economic	Severe disruption in national GDP due to the destruction of infrastructure or assets
26	Economic	Increase in government spending on infrastructure reconstruction and recovery
26	Economic	Decrease in foreign investment as a result of destroyed assets and infrastructure
26	Economic	Financial losses in sectors directly impacted by the destruction (e.g., transportation, energy)
26	Economic	Impact on local businesses and industries due to the loss of infrastructure and assets
26	Economic	Increase in unemployment due to the destruction of key industries and services
26	Economic	Impact on local housing markets as a result of destroyed infrastructure or assets
26	Economic	Disruption in trade and international business operations due to the loss of infrastructure
26	Economic	Increase in humanitarian aid and financial support for rebuilding destroyed infrastructure
26	Economic	Financial resources allocated for the construction and restoration of destroyed infrastructure
26	Military	Deployment of military forces to secure or protect key infrastructure from further destruction
26	Military	Use of military logistics to transport and deliver materials for infrastructure rebuilding
26	Military	Deployment of military engineering units to repair or rebuild destroyed infrastructure
26	Military	Coordination between military forces and civilian authorities to rebuild destroyed infrastructure
26	Military	Provision of military resources to ensure the security of infrastructure reconstruction projects
26	Military	Use of military intelligence to monitor the status of critical infrastructure and prevent further damage
26	Military	Deployment of peacekeeping forces to ensure stability in areas affected by destroyed assets
26	Military	Protection of vital infrastructure from sabotage or further attacks during rebuilding efforts
26	Military	Assistance from military engineers in clearing debris and restoring public infrastructure
26	Military	Coordination between military and international organizations to facilitate infrastructure recovery
26	Informational	Media coverage of the destruction of infrastructure and its impact on the economy
26	Informational	Government statements on the extent of infrastructure destruction and recovery plans
26	Informational	International media’s portrayal of the damage to national assets and infrastructure
26	Informational	Use of media to report on efforts and challenges related to rebuilding destroyed assets
26	Informational	Dissemination of information on the allocation of resources for infrastructure recovery
26	Informational	Public campaigns to garner support for rebuilding efforts and recovery of destroyed assets
26	Informational	Use of social media to raise awareness of the destruction and recovery efforts
26	Informational	International NGO statements on the need for international aid in rebuilding destroyed infrastructure
26	Informational	Reporting on the humanitarian consequences of the destruction of infrastructure or assets
26	Informational	Use of media to highlight the international community's role in infrastructure rebuilding
27	Diplomatic	International calls for action to address the high mortality rates
27	Diplomatic	National government statements on the causes and response to high mortality rates
27	Diplomatic	Creation of emergency health measures or frameworks to mitigate localized mortality
27	Diplomatic	Political mobilization and debates on health system failures leading to high mortality
27	Diplomatic	International pressure on the government to provide transparency about mortality rates
27	Diplomatic	Shifts in national health policies to address the causes of localized mortality
27	Diplomatic	Increase in governmental powers or regulations to manage health crises causing mortality
27	Diplomatic	Changes in local governance or leadership due to the public health crisis
27	Diplomatic	National or international legal frameworks to support the relief and recovery efforts
27	Diplomatic	Impact on political stability due to the public health crisis and rising mortality rates
27	Economic	Increase in government spending on healthcare and emergency response services
27	Economic	Disruption to local economies due to the impact of high mortality on the workforce
27	Economic	Increase in healthcare-related costs due to mortality from preventable causes
27	Economic	Decline in local GDP as a result of widespread mortality and its societal impacts
27	Economic	Impact on local businesses due to high mortality rates and workforce shortages
27	Economic	Increase in the demand for international aid and humanitarian support in affected regions
27	Economic	Impact on the insurance sector due to increased mortality rates
27	Economic	Financial strain on public services due to high mortality and emergency responses
27	Economic	Increase in unemployment as a result of local workforce loss due to high mortality
27	Economic	Decline in tourism and international trade due to localized mortality crisis
27	Military	Deployment of military forces to assist in health crisis management and response
27	Military	Use of military logistics to deliver medical supplies and humanitarian aid
27	Military	Deployment of military medical units to provide treatment and prevent further mortality
27	Military	Coordination between military and civilian health agencies to manage localized mortality
27	Military	Deployment of peacekeeping forces to stabilize regions affected by health crises
27	Military	Use of military intelligence to track and contain the spread of diseases contributing to mortality
27	Military	Establishment of military-controlled zones to deliver aid and monitor public health
27	Military	Use of military assets to provide shelter and resources for displaced populations affected by high mortality
27	Military	Deployment of military forces to ensure security and prevent violence during health crisis
27	Military	Restoration of order and security in regions heavily impacted by high mortality
27	Informational	Media coverage of the high mortality rates and its causes
27	Informational	International media’s portrayal of the local mortality crisis and governmental response
27	Informational	Use of media to spread awareness of the health crisis and mortality rates
27	Informational	Government public statements on efforts to control and reduce mortality rates
27	Informational	Reports on the social and economic impacts of high mortality on local communities
27	Informational	Dissemination of health guidelines and preventive measures to address mortality
27	Informational	Use of social media to spread information about the causes and prevention of high mortality
27	Informational	International NGO statements on the health crisis and support for reducing mortality
27	Informational	Media campaigns to raise awareness of the ongoing mortality crisis and public health response
27	Informational	Reporting on the effectiveness of intervention measures to reduce mortality rates in affected regions
28	Diplomatic	Shifts in national foreign policy due to neutralized diplomatic commitments
28	Diplomatic	International calls for action to restore diplomatic commitments
28	Diplomatic	Changes in diplomatic relations as a result of neutralized commitments
28	Diplomatic	Creation of new diplomatic frameworks or alliances to replace neutralized commitments
28	Diplomatic	National government statements explaining the neutralization of diplomatic commitments
28	Diplomatic	International pressure on the government to re-engage in diplomatic agreements
28	Diplomatic	Changes in international diplomatic priorities as a result of lost commitments
28	Diplomatic	Impact on the country’s standing in international organizations (e.g., UN) due to neutralized commitments
28	Diplomatic	Increase in domestic political unrest or protests due to perceived diplomatic failure
28	Diplomatic	Reorientation of foreign policy to address the consequences of neutralized commitments
28	Economic	Decrease in foreign investment due to the neutralization of diplomatic commitments
28	Economic	Impact on international trade due to the loss of diplomatic agreements or commitments
28	Economic	Decline in bilateral and multilateral economic cooperation as a result of neutralized commitments
28	Economic	Impact on local businesses due to disrupted international partnerships and trade agreements
28	Economic	Reduction in international financial aid or support due to diplomatic disengagement
28	Economic	Increase in costs for businesses dealing with the fallout of neutralized diplomatic commitments
28	Economic	Shifts in labor markets affected by the loss of international agreements or partnerships
28	Economic	Disruption in economic sectors (e.g., export/import industries) as a result of neutralized commitments
28	Economic	Financial instability due to changes in international economic relations caused by diplomatic failure
28	Military	Deployment of military forces to stabilize regions affected by the fallout of neutralized commitments
28	Military	Increase in military intelligence efforts to monitor international relations after diplomatic neutralization
28	Military	Coordination between military and diplomatic authorities to manage the effects of disengagement
28	Military	Use of military assets to protect national interests impacted by the loss of diplomatic commitments
28	Military	Deployment of military forces to ensure security and prevent conflict arising from neutralized commitments
28	Military	Use of military diplomacy to rebuild or strengthen international relationships post-neutralization
28	Military	Operation of peacekeeping forces to manage the instability created by broken diplomatic ties
28	Military	Establishment of military-controlled zones to ensure order during periods of diplomatic disengagement
28	Military	Monitoring of international activities by military units to protect national interests affected by diplomatic shifts
28	Military	Use of military logistics to assist in managing the consequences of neutralized diplomatic commitments
28	Informational	Media coverage of the neutralization of diplomatic commitments and its implications
28	Informational	International media’s portrayal of the government’s failure to uphold diplomatic commitments
28	Informational	Government public statements on the reasons and plans related to neutralized diplomatic commitments
28	Informational	Use of media to explain the long-term consequences of neutralized diplomatic relationships
28	Informational	Dissemination of information on new diplomatic approaches following the neutralization of commitments
28	Informational	International NGO reports on the implications of neutralized diplomatic commitments on global stability
28	Informational	Use of social media to spread information regarding changes in diplomatic relations
28	Informational	Media campaigns to maintain or regain public trust in the national diplomatic efforts
28	Informational	Reporting on the diplomatic alternatives or solutions being pursued after neutralization
28	Informational	Disinformation or misinformation regarding the reasons behind the neutralized diplomatic commitments
29	Diplomatic	Shifts in national foreign policy due to weakened international alliances
29	Diplomatic	Changes in diplomatic relations as a result of weakened alliances
29	Diplomatic	Creation of new diplomatic agreements or partnerships to compensate for weakened alliances
29	Diplomatic	International pressure on the government to restore or strengthen weakened alliances
29	Diplomatic	Political mobilization and debates within the country due to the weakening of international alliances
29	Diplomatic	Impact on national security policies due to the reduced influence of alliances
29	Diplomatic	Changes in leadership or shifts in political priorities due to weakened alliances
29	Diplomatic	Changes in international diplomatic priorities as a result of weakened alliances
29	Diplomatic	International organizations’ reactions to the weakening of alliances (e.g., UN, NATO)
29	Diplomatic	National government statements on the efforts to address weakened alliances and restore relations
29	Economic	Decrease in foreign investment due to instability in international alliances
29	Economic	Impact on trade agreements and economic cooperation due to weakened alliances
29	Economic	Disruption in international supply chains due to instability in allied partnerships
29	Economic	Reduction in foreign aid or economic support from weakened allies
29	Economic	Shifts in labor markets affected by changes in international partnerships and alliances
29	Economic	Increase in tariffs or trade barriers as a result of weakened international relations
29	Economic	Impact on local businesses due to disrupted trade and economic cooperation with weakened allies
29	Economic	Financial instability or uncertainty due to the weakening of key international economic partnerships
29	Economic	Increase in costs for businesses that were dependent on strong international alliances
29	Military	Deployment of military forces to protect national interests affected by weakened alliances
29	Military	Increase in military spending or reallocation of resources due to the decline in alliance support
29	Military	Coordination between military and diplomatic forces to address the instability caused by weakened alliances
29	Military	Shifts in military priorities or strategies due to weakened international alliances
29	Military	Increase in military intelligence efforts to monitor the security situation resulting from weakened alliances
29	Military	Deployment of peacekeeping forces to stabilize regions affected by weakened alliances
29	Military	Use of military resources to secure borders or critical infrastructure in response to reduced allied support
29	Military	Establishment of new military coalitions or partnerships to counteract weakened alliances
29	Military	Monitoring of foreign military activities due to the instability caused by weakened alliances
29	Military	Use of military diplomacy to rebuild or strengthen alliances following their weakening
29	Informational	Media coverage of the weakening of international alliances and its political implications
29	Informational	International media portrayal of the effects of weakened alliances on national security
29	Informational	Government public statements on the causes and plans to address weakened alliances
29	Informational	International NGO statements on the effects of weakened alliances on global stability and security
29	Informational	Use of media to inform the public about efforts to strengthen or rebuild alliances
29	Informational	Reporting on the economic and social impacts of weakened alliances on the country
29	Informational	Use of social media to raise awareness about the consequences of weakened international relations
29	Informational	Media campaigns to maintain public confidence in the national government’s ability to manage alliances
29	Informational	International media’s coverage of alternative diplomatic strategies in the face of weakened alliances
29	Informational	Disinformation or misinformation spread about the reasons for the weakening of alliances
30	Diplomatic	International condemnation or support for the death or disappearance of prominent figures
30	Diplomatic	Changes in national leadership following the recurrent death or disappearance of prominent figures
30	Diplomatic	Political instability caused by the repeated death or disappearance of influential leaders
30	Diplomatic	Increase in government efforts to ensure the safety of key public figures
30	Diplomatic	Shifts in national security policies in response to recurrent high-profile disappearances or deaths
30	Diplomatic	International diplomatic pressure to address the deaths or disappearances of prominent figures
30	Diplomatic	National debates on accountability and the causes of recurrent political violence
30	Diplomatic	Impact on national sovereignty and international relations due to the frequent death or disappearance of leaders
30	Diplomatic	Political mobilization or protests driven by public dissatisfaction with the government’s handling of prominent deaths
30	Diplomatic	Legislative or security reforms initiated in response to recurring high-profile deaths or disappearances
30	Economic	Decrease in national GDP due to the disruption caused by the death or disappearance of influential leaders
30	Economic	Impact on foreign investment as a result of instability and the loss of prominent figures
30	Economic	Decline in local businesses or sectors influenced by the leadership or actions of the deceased or disappeared figures
30	Economic	Increase in government spending on security and intelligence services to protect remaining leaders
30	Economic	Shifts in public sector budgets due to the increased need for security and crisis management
30	Economic	Reduction in consumer confidence and spending as a result of political instability
30	Economic	Disruption in local economies due to the loss of leadership or influential public figures
30	Economic	Impact on national economic planning and international trade as key decision-makers are lost
30	Economic	Financial costs of security measures implemented after the recurrent disappearance or death of figures
30	Military	Deployment of military forces to secure prominent figures and prevent further deaths or disappearances
30	Military	Use of military intelligence to track and prevent the targeted deaths or disappearances of high-profile leaders
30	Military	Deployment of special forces to investigate or respond to the disappearance or death of public figures
30	Military	Coordination between military and law enforcement to ensure the protection of national leadership
30	Military	Use of military resources to monitor and prevent any further threats to prominent leaders
30	Military	Deployment of peacekeeping forces to maintain order and prevent further violence in areas affected by leadership loss
30	Military	Increase in military presence in politically unstable regions following high-profile deaths or disappearances
30	Military	Use of military technology to track threats and identify potential perpetrators behind the recurrent deaths
30	Military	Protection of critical infrastructure and assets from being destabilized by the loss of key figures
30	Military	Restoration of order in areas affected by the violence following the death or disappearance of public figures
30	Informational	Media coverage of the recurrent deaths or disappearances of prominent figures
30	Informational	Use of social media to report on and raise awareness of the deaths or disappearances
30	Informational	International media’s portrayal of the deaths or disappearances and their political implications
30	Informational	Government statements regarding the security measures being taken to prevent further losses
30	Informational	Dissemination of information on investigations or actions taken to address the deaths or disappearances
30	Informational	Reporting on the societal impact of the deaths or disappearances of public figures
30	Informational	International NGO statements on the effects of political violence and the disappearance of leaders
30	Informational	Use of media to discuss the potential causes and consequences of the deaths or disappearances
30	Informational	Public campaigns to generate support for the protection of remaining political figures
30	Informational	Misinformation or disinformation spread regarding the causes or perpetrators behind the recurrent deaths
31	Diplomatic	International calls for action to restore the compromised health system
31	Diplomatic	National government statements on the failure or breakdown of the health system
31	Diplomatic	Creation of emergency measures or frameworks to address the compromised health system
31	Diplomatic	Political mobilization and debates about accountability for the health system’s collapse
31	Diplomatic	International diplomatic pressure to support the rebuilding of the health system
31	Diplomatic	Shifts in national health policies to address the crisis in the health system
31	Diplomatic	Changes in government leadership or health sector management in response to system failures
31	Diplomatic	Impact on national security as the health system becomes increasingly compromised
31	Diplomatic	National and international legal frameworks supporting health system recovery efforts
31	Diplomatic	Impact on public trust and political stability due to the health system's failure
31	Economic	Increase in government spending on emergency healthcare and recovery efforts
31	Economic	Decline in national GDP due to the collapse of the healthcare system and its impact on productivity
31	Economic	Increase in healthcare-related costs as a result of the compromised system
31	Economic	Financial losses in the private sector due to limited access to healthcare and medical services
31	Economic	Impact on local businesses and industries due to the inability to rely on healthcare services
31	Economic	Increase in the demand for international aid and foreign financial support to restore the health system
31	Economic	Shifts in labor markets due to the decreased availability and quality of healthcare
31	Economic	Increase in public spending to provide emergency medical care in response to the crisis
31	Economic	Disruption in the economy as healthcare infrastructure is unable to meet public needs
31	Economic	Reduction in tourism and international trade due to the weakened health system
31	Military	Deployment of military forces to assist in healthcare delivery during the crisis
31	Military	Use of military logistics to transport and deliver medical supplies to affected areas
31	Military	Deployment of military medical units to provide treatment in regions with compromised health systems
31	Military	Coordination between military and civilian health agencies to address the crisis
31	Military	Protection of critical healthcare infrastructure from damage or exploitation
31	Military	Deployment of peacekeeping forces to maintain order in areas impacted by the health system collapse
31	Military	Use of military intelligence to track and mitigate the effects of the compromised health system
31	Military	Assistance from military engineers to restore or build essential healthcare infrastructure
31	Military	Deployment of special forces to protect key medical sites or facilities during the crisis
31	Military	Restoration of essential medical services in areas with compromised healthcare systems
31	Informational	Media coverage of the health system collapse and its impact on society
31	Informational	International media’s portrayal of the national health crisis and government response
31	Informational	Government public statements on the state of the health system and recovery plans
31	Informational	Use of media to raise awareness about the compromised health system and mitigation efforts
31	Informational	Reports on the social and economic consequences of the compromised healthcare system
31	Informational	International NGO statements on the effects of a compromised health system and the need for intervention
31	Informational	Use of media to inform the public about health guidelines and emergency medical measures
31	Informational	Dissemination of information on the efforts to rebuild and restore the health system
31	Informational	Public campaigns to encourage the population to follow health guidelines in the crisis
31	Informational	Misinformation or disinformation spread about the causes and consequences of the compromised health system
32	Diplomatic	Shifts in national policies regarding the management of migration and emigration
32	Diplomatic	International agreements or frameworks to address recurrent emigration and mobilization
32	Diplomatic	Government statements on the causes and consequences of recurrent mobilization and emigration
32	Diplomatic	Political debates on the implications of emigration for national security and development
32	Diplomatic	Impact on national sovereignty and political stability due to recurrent emigration
32	Diplomatic	Creation of new laws or measures to manage or control recurrent emigration and mobilization
32	Diplomatic	National and international diplomatic efforts to address the effects of recurrent mobilization
32	Diplomatic	Impact on political relations with neighboring countries due to recurrent emigration
32	Diplomatic	Shifts in foreign relations due to the movement of large numbers of citizens abroad
32	Diplomatic	Increase in political unrest or public protests driven by the causes of emigration
32	Economic	Impact on national labor markets due to the loss of skilled workers and talent through emigration
32	Economic	Decrease in national GDP due to the loss of workforce resulting from recurrent emigration
32	Economic	Increase in remittances sent back by emigrants, impacting the local economy
32	Economic	Impact on public services as a result of the emigration of key workers (e.g., healthcare, education)
32	Economic	Increase in government spending on programs to address emigration and integrate returnees
32	Economic	Decline in the workforce leading to higher unemployment rates in sectors affected by emigration
32	Economic	Financial losses in industries due to labor shortages caused by emigration
32	Economic	Increase in humanitarian aid or foreign assistance directed to support emigrants or refugees
32	Economic	Shifts in economic priorities due to the need to manage the consequences of emigration
32	Economic	Financial resources allocated to programs designed to prevent further emigration or support returnees
32	Military	Deployment of military forces to secure borders and prevent illegal emigration or smuggling
32	Military	Use of military logistics to provide aid and support to emigrants or displaced persons
32	Military	Coordination between military and humanitarian organizations to manage emigration flows
32	Military	Use of military intelligence to track and monitor recurrent emigration and mobilization patterns
32	Military	Deployment of peacekeeping forces to manage migration or emigration-related unrest
32	Military	Use of military personnel to assist in managing refugee camps or emigration processing centers
32	Military	Deployment of military forces to ensure order and security in regions affected by mass emigration
32	Military	Monitoring and securing transportation routes used for emigration and migration
32	Military	Assistance from military engineers to help rebuild infrastructure in areas facing emigration
32	Military	Deployment of military resources to manage or facilitate the reintegration of returnees
32	Informational	Media coverage of recurrent mobilization and emigration patterns and their causes
32	Informational	International media portrayal of the national emigration crisis and its impact on society
32	Informational	Government public statements on the reasons for and consequences of emigration and mobilization
32	Informational	Use of social media to raise awareness of emigration issues and their impact on the country
32	Informational	Dissemination of information about government programs designed to address or manage emigration
32	Informational	Reports on the challenges faced by emigrants and refugees in host countries
32	Informational	International NGO reports on the impact of emigration on local communities and the national economy
32	Informational	Use of media to highlight efforts to support emigrants, refugees, and returnees
32	Informational	Public campaigns to discourage emigration or to encourage return of emigrants
32	Informational	Misinformation or disinformation spread regarding the causes and effects of recurrent emigration
33	Diplomatic	Changes in law enforcement policies to address organised crime
33	Diplomatic	Political corruption linked to organised crime activities
33	Diplomatic	Influence of organised crime groups in local or national politics
33	Diplomatic	Expansion of illegal political donations through organised crime
33	Diplomatic	Pressure from international organizations to combat organised crime
33	Diplomatic	Implementation of anti-organised crime laws and measures
33	Diplomatic	Shifts in government priorities due to the rise of organised crime
33	Diplomatic	Political responses to cross-border organised crime activities
33	Diplomatic	Engagement of political figures with organised crime syndicates
33	Diplomatic	Increase in criminal groups’ ability to influence government decisions
33	Economic	Growth in illegal markets and black market activities
33	Economic	Impact of organised crime on legitimate businesses and market competition
33	Economic	Influence of organised crime on real estate prices through money laundering
33	Economic	Impact of organised crime on banking systems and financial sectors
33	Economic	Increase in money laundering activities in formal financial systems
33	Economic	Reduction in tax revenues due to black market trade
33	Economic	Costs of law enforcement and judicial systems combating organised crime
33	Economic	Investment in illicit economies such as drug trade, human trafficking
33	Economic	Fluctuations in regional economic stability due to organised crime
33	Economic	Economic dependence on illegal revenue streams within communities
33	Military	Deployment of military resources to counter organised crime
33	Military	Military involvement in counter-narcotics and anti-crime operations
33	Military	Use of military intelligence to target organised crime groups
33	Military	Establishment of military zones to combat organised criminal activities
33	Military	Coordination between military and local law enforcement agencies
33	Military	Provision of military assets for high-profile anti-crime operations
33	Military	Use of special operations forces (SOF) to dismantle criminal organizations
33	Military	Military enforcement of border security to prevent cross-border organised crime
33	Military	Military operations targeting criminal enterprises and cartel strongholds
33	Military	Security operations to protect civilian infrastructure from organised crime
33	Informational	Media coverage of organised crime syndicates and their operations
33	Informational	Public awareness campaigns about the dangers of organised crime
33	Informational	Use of social media by criminal groups to recruit or spread propaganda
33	Informational	Government reports and public communication about organised crime trends
33	Informational	Media focus on law enforcement success in tackling organised crime
33	Informational	International media coverage of cross-border organised crime activities
33	Informational	News coverage of public safety risks due to organised crime
33	Informational	Media portrayal of the economic impact of organised crime
33	Informational	Dissemination of government strategies to combat organised crime in the media
33	Informational	Social media campaigns targeting public perceptions of organised crime
34	Diplomatic	International recognition of the moderate scope of the humanitarian intervention
34	Diplomatic	Government statements on the objectives and limitations of the humanitarian intervention
34	Diplomatic	Creation of international agreements or frameworks specifying the limits of the intervention
34	Diplomatic	Shifts in national policies to allow for a more limited and focused humanitarian intervention
34	Diplomatic	Political debates on the scale and boundaries of the humanitarian intervention
34	Diplomatic	International support or opposition to the limited nature of the intervention
34	Diplomatic	Impact on national sovereignty as a result of international humanitarian intervention
34	Diplomatic	National and international legal frameworks supporting the moderate scope of the intervention
34	Diplomatic	Changes in diplomatic relations as a result of the intervention’s limited scope
34	Diplomatic	Reactions from political leaders within the country regarding the scale of the intervention
34	Economic	Increase in government spending for targeted humanitarian aid programs with limited scope
34	Economic	Shifts in local labor markets due to the focus of humanitarian aid in specific sectors
34	Economic	Impact on local businesses due to the targeted focus of the intervention on specific areas
34	Economic	Increase in the allocation of resources to specific regions or sectors affected by the humanitarian crisis
34	Economic	Financial aid from international organizations to support the limited intervention efforts
34	Economic	Increase in the demand for goods and services in targeted intervention areas
34	Economic	Impact on the informal or black market as a result of the limited humanitarian aid
34	Economic	Changes in employment rates in sectors directly supported by the limited intervention
34	Economic	Financial stability in the intervention zone due to targeted economic aid
34	Economic	Increase in economic assistance specifically directed to humanitarian priorities in selected areas
34	Military	Deployment of military forces with limited mandate to assist in humanitarian efforts
34	Military	Coordination between military forces and humanitarian agencies to deliver targeted aid
34	Military	Deployment of peacekeeping forces under strict mandates to assist in the intervention
34	Military	Use of military logistics to support the efficient distribution of humanitarian aid in selected areas
34	Military	Monitoring and securing key transportation routes for the delivery of humanitarian aid
34	Military	Provision of military medical support under the constraints of the intervention’s limited scope
34	Military	Restoration of order in the areas receiving humanitarian assistance while maintaining security
34	Military	Training military personnel to manage limited humanitarian operations and respond to emergencies
34	Military	Use of military technology to monitor and track the delivery of aid in specific regions
34	Military	Assisting in the construction or restoration of key infrastructure with humanitarian focus
34	Informational	Media coverage of the limited scope of the humanitarian intervention and its effectiveness
34	Informational	Government statements on the focus and objectives of the humanitarian intervention
34	Informational	International media’s portrayal of the intervention’s limited nature and targeted efforts
34	Informational	Reporting on the successes and challenges of the limited intervention in specific areas
34	Informational	Use of media to highlight the goals and constraints of the humanitarian intervention
34	Informational	Dissemination of information regarding the allocation of resources in limited intervention zones
34	Informational	Use of media to promote awareness about the positive impacts of the targeted intervention
34	Informational	International NGO reports on the impact of the intervention in the selected areas
34	Informational	Public campaigns to generate support for the intervention, emphasizing its moderate scale
34	Informational	Misinformation or disinformation spread about the effectiveness or limitations of the intervention
35	Diplomatic	Implementation of austerity measures to address recession
35	Diplomatic	Changes in government leadership due to economic crisis
35	Diplomatic	International pressure for economic reform
35	Diplomatic	Reduction in public spending in key sectors
35	Diplomatic	Increased unemployment benefits or welfare support
35	Diplomatic	Adjustments in national fiscal policies to combat recession
35	Diplomatic	Reforms in taxation policies to boost economic recovery
35	Diplomatic	Government focus on foreign direct investment to stimulate recovery
35	Diplomatic	Legislative changes to encourage economic stimulus programs
35	Diplomatic	National dialogue with international financial institutions for bailout support
35	Economic	Decline in national GDP growth rate
35	Economic	Increase in national unemployment rates
35	Economic	Reduction in industrial production and consumer demand
35	Economic	Decrease in consumer spending and investment
35	Economic	Rise in bankruptcies or closures of small businesses
35	Economic	Decline in housing market value and property investments
35	Economic	Reduction in export volumes and international trade
35	Economic	Government borrowing or national debt increase to stimulate economy
35	Economic	Decline in stock market performance and investor confidence
35	Economic	Government intervention in key industries to prevent collapse
35	Military	Deployment of military to manage civil unrest or protests due to economic hardship
35	Military	Use of military resources to support essential services during economic downturn
35	Military	Coordination of military and civilian agencies in disaster recovery due to economic strain
35	Military	Military participation in national economic recovery efforts (e.g., infrastructure projects)
35	Military	Use of military forces to secure critical national resources during economic crises
35	Military	Increased role of military in economic governance (e.g., controlling key industries)
35	Military	Military support in managing refugee or displaced population due to economic collapse
35	Military	Presence of military peacekeeping forces during national economic collapse
35	Military	Military assets used for securing borders or preventing smuggling in recessionary periods
35	Military	Military aid or support for international humanitarian efforts due to economic collapse
35	Informational	Media coverage of government economic recovery plans
35	Informational	Public announcements on the status of the national economy by government officials
35	Informational	Media portrayal of economic hardship and its impact on citizens
35	Informational	Increase in social media campaigns to address national economic issues
35	Informational	Reports on inflation rates and their effect on the population
35	Informational	Distribution of government relief programs or bailout packages through media
35	Informational	Government propaganda on successful economic recovery measures
35	Informational	Use of international media to showcase national efforts to overcome recession
35	Informational	News reports on unemployment rates and economic inequality during recession
35	Informational	Public discussions on economic policies and reforms in national media
36	Diplomatic	International diplomatic efforts to implement moderate economic sanctions
36	Diplomatic	Shifts in national policy in response to the establishment of moderate economic sanctions
36	Diplomatic	Creation of legal frameworks to enforce and regulate moderate economic sanctions
36	Diplomatic	National government statements explaining the rationale and objectives of the sanctions
36	Diplomatic	Changes in diplomatic relations with countries affected by the moderate economic sanctions
36	Diplomatic	International support or opposition to the establishment of moderate sanctions
36	Diplomatic	Impact on national sovereignty due to the enforcement of economic sanctions
36	Diplomatic	International debates on the effectiveness and fairness of the moderate sanctions
36	Diplomatic	Impact on national leadership due to the implementation of economic sanctions
36	Diplomatic	Creation of international cooperation agreements to ensure compliance with moderate sanctions
36	Economic	Decrease in national GDP due to the impact of moderate economic sanctions
36	Economic	Impact on trade flows and international business due to the sanctions
36	Economic	Disruption in key industries (e.g., energy, technology) as a result of sanctions
36	Economic	Decrease in foreign investment due to uncertainty created by moderate sanctions
36	Economic	Shifts in labor markets affected by industries targeted by economic sanctions
36	Economic	Increase in the costs of goods and services due to import/export restrictions
36	Economic	Financial losses in sectors directly impacted by moderate economic sanctions
36	Economic	Increase in the informal or black market as a result of sanctioned restrictions
36	Economic	Impact on local businesses as a result of decreased international trade
36	Economic	Increase in government spending to offset the economic impacts of the sanctions
36	Military	Deployment of military forces to protect critical infrastructure targeted by sanctions
36	Military	Use of military intelligence to track and prevent sanctions evasion or loophole exploitation
36	Military	Coordination between military and law enforcement to enforce sanctions and prevent illegal trade
36	Military	Protection of key industries and resources from foreign exploitation due to sanctions
36	Military	Deployment of military assets to secure transportation routes for sanctioned goods
36	Military	Monitoring international borders to prevent the illegal movement of sanctioned goods
36	Military	Deployment of special forces to combat smuggling and the circumvention of sanctions
36	Military	Use of military technology to monitor compliance with moderate economic sanctions
36	Military	Deployment of peacekeeping forces to maintain stability in areas impacted by economic sanctions
36	Military	Use of military logistics to ensure the effective distribution of humanitarian aid amidst sanctions
36	Informational	Media coverage of the establishment of moderate economic sanctions and their impact
36	Informational	Public government statements on the objectives and justifications for the sanctions
36	Informational	International media portrayal of the national economy under moderate economic sanctions
36	Informational	Use of media to explain the benefits and costs of the economic sanctions to the public
36	Informational	Reporting on the effectiveness of moderate sanctions and the consequences for affected industries
36	Informational	International NGO statements on the humanitarian consequences of the moderate sanctions
36	Informational	Use of media to inform the public about government efforts to mitigate the effects of sanctions
36	Informational	Dissemination of information on the international response to the sanctions
36	Informational	Use of social media to highlight the effects of the sanctions on local businesses and consumers
37	Diplomatic	Internal government attempts to control or restrict the flow of disinformation
37	Diplomatic	Changes in national laws or regulations aimed at addressing the spread of disinformation
37	Diplomatic	National government statements condemning or counteracting the internal disinformation
37	Diplomatic	Political responses to accusations of internal disinformation campaigns
37	Diplomatic	International diplomatic reactions to the spread of internal disinformation
37	Diplomatic	Increase in censorship or regulation of social media platforms due to disinformation
37	Diplomatic	Impact on national credibility as a result of disinformation dissemination
37	Diplomatic	International calls for government action to address the internal disinformation
37	Diplomatic	Creation of task forces or committees to investigate internal disinformation
37	Diplomatic	Use of state-controlled media to counteract the internal disinformation narrative
37	Economic	Economic impact due to public distrust generated by the spread of disinformation
37	Economic	Changes in consumer behaviour driven by misinformation about industries or products
37	Economic	Financial losses for businesses affected by disinformation campaigns
37	Economic	Impact on market volatility triggered by false or misleading information
37	Economic	Decrease in investments due to uncertainty created by disinformation
37	Economic	Changes in stock prices driven by internal disinformation
37	Economic	Increase in demand for fact-checking services and information verification tools
37	Economic	Shift in public spending due to the influence of disinformation on consumer choices
37	Economic	Impact on foreign trade relations due to misperceptions caused by disinformation
37	Economic	Increase in government spending on anti-disinformation measures
37	Military	Deployment of military units to protect critical infrastructure from disinformation-driven unrest
37	Military	Use of military intelligence to identify sources of internal disinformation
37	Military	Coordination between military and law enforcement to monitor and respond to disinformation campaigns
37	Military	Use of military assets to secure strategic locations affected by public unrest due to disinformation
37	Military	Deployment of cybersecurity units to neutralise online disinformation sources
37	Military	Use of military propaganda to counteract the effects of internal disinformation
37	Military	Monitoring of internal social movements that emerge due to disinformation
37	Military	Use of military communication channels to provide accurate information during disinformation crises
37	Military	Deployment of military police to control disturbances linked to disinformation
37	Military	Use of special forces to conduct covert operations targeting disinformation networks
37	Informational	Media coverage of the internal disinformation campaigns and their effects on society
37	Informational	Government statements clarifying and correcting internal disinformation
37	Informational	Use of media to expose the sources of disinformation and their motivations
37	Informational	Media reports on public responses to internal disinformation
37	Informational	Use of social media platforms to spread counter-narratives against disinformation
37	Informational	International news coverage of the internal disinformation crisis and its implications
37	Informational	Publication of fact-checking reports and analysis to debunk false information
37	Informational	Media campaigns by independent organisations to raise awareness of disinformation
37	Informational	Use of public service announcements to educate citizens on recognising and avoiding disinformation
37	Informational	Deployment of artificial intelligence tools to detect and counteract disinformation in real time
38	Diplomatic	Government attempts to identify and punish those responsible for the information leak
38	Diplomatic	Increase in legislative efforts to enhance data security and prevent future leaks
38	Diplomatic	Political responses to the public impact of the leaked sensitive information
38	Diplomatic	International diplomatic reactions to the leakage of sensitive national information
38	Diplomatic	Increase in government surveillance and monitoring of sensitive data channels
38	Diplomatic	Changes in national security policies to tighten control over classified information
38	Diplomatic	Impact on national reputation due to the exposure of sensitive information
38	Diplomatic	Increase in political divisions within the government due to the handling of the leak
38	Diplomatic	Creation of task forces or committees to investigate the origins and impact of the leak
38	Diplomatic	International calls for greater transparency and accountability following the leak
38	Economic	Economic losses due to market reactions triggered by leaked sensitive information
38	Economic	Shifts in foreign investment as a result of perceived instability caused by the leak
38	Economic	Increase in demand for cybersecurity services following the leakage
38	Economic	Financial impact on companies or sectors directly affected by the leaked information
38	Economic	Market volatility caused by the release of sensitive economic or business information
38	Economic	Decreased consumer confidence resulting from the exposure of sensitive corporate data
38	Economic	Impact on international trade relations due to leaked economic strategies or policies
38	Economic	Increased costs of regulatory compliance in response to the leakage of sensitive information
38	Economic	Decrease in investor confidence due to the uncertainty generated by the leak
38	Economic	Increase in government spending on protecting sensitive information in the wake of the leak
38	Military	Deployment of military forces to secure sensitive facilities or locations at risk from the leak
38	Military	Use of military intelligence to track and prevent the exploitation of leaked information
38	Military	Deployment of cybersecurity units to prevent further unauthorized access to sensitive data
38	Military	Coordination between military and intelligence agencies to mitigate the impact of the leak
38	Military	Protection of national security assets from potential threats posed by leaked information
38	Military	Deployment of military police or special forces to investigate and counter threats related to the leak
38	Military	Use of military resources to safeguard critical infrastructure impacted by the leaked information
38	Military	Monitoring of potential threats from foreign adversaries capitalizing on the leaked data
38	Military	Use of military communication channels to contain the damage caused by the leak
38	Military	Deployment of military units to prevent public unrest or destabilisation resulting from the leak
38	Informational	Media coverage of the leaked sensitive information and its potential consequences
38	Informational	Government statements addressing the leak and reassuring the public about security measures
38	Informational	Use of media to clarify the origins and scope of the sensitive information leak
38	Informational	Media reports on the public and political responses to the leaked information
38	Informational	Dissemination of fact-based narratives to counteract misinformation following the leak
38	Informational	Use of public service announcements to guide citizens on how to protect personal data post-leak
38	Informational	International media coverage of the security breach and its impact on national stability
38	Informational	Press conferences or media briefings to update the public on the investigation of the leak
38	Informational	Dissemination of information on the actions taken to prevent further data breaches
38	Informational	Use of social media platforms to reassure the public and manage the narrative surrounding the leak
39	Diplomatic	Government response to widespread communication breakdown within public sectors
39	Diplomatic	Legislative initiatives aimed at improving national communication infrastructures
39	Diplomatic	Internal policy changes to address inefficiencies in government communication channels
39	Diplomatic	Political leaders' public statements on the need to address communication deficiencies
39	Diplomatic	Changes in diplomatic channels due to challenges in consistent communication with allies
39	Diplomatic	International diplomatic concerns regarding the communication breakdown within the state
39	Diplomatic	Formation of task forces or commissions to investigate communication deficiencies in government
39	Diplomatic	Shift in national security priorities due to the challenges in transmitting crucial information
39	Diplomatic	Increase in public awareness campaigns to address the communication crisis
39	Diplomatic	International condemnation or support for the government's handling of communication issues
39	Economic	Economic losses due to the failure of communication systems affecting trade or business operations
39	Economic	Disruption in market operations caused by delayed or inaccurate information due to communication failures
39	Economic	Decrease in consumer confidence as a result of unreliable communication from businesses or government
39	Economic	Impact on foreign investments due to the perception of communication-related instability
39	Economic	Shifts in business operations or production delays due to communication deficiencies
39	Economic	Increased costs for companies implementing backup communication systems to overcome deficiencies
39	Economic	Disruption in the financial markets caused by the inability to transmit crucial market information
39	Economic	Changes in consumer spending due to uncertainty created by a lack of clear communication
39	Economic	Increase in demand for technological solutions aimed at overcoming communication barriers
39	Economic	Government spending on communication infrastructure to address the deficiencies
39	Military	Deployment of military assets to restore secure communication lines for national security purposes
39	Military	Use of military intelligence to address vulnerabilities caused by communication deficiencies
39	Military	Coordination between military and civilian agencies to mitigate the impact of communication breakdowns
39	Military	Deployment of military personnel to assist in establishing communication lines in affected regions
39	Military	Use of military resources to repair or replace damaged communication infrastructure
39	Military	Deployment of military units to secure critical communication infrastructure from cyber threats
39	Military	Use of military technology to create temporary communication networks during crises
39	Military	Monitoring of communication systems to prevent further breakdowns and restore order
39	Military	Coordination between military and law enforcement to control public unrest due to communication failures
39	Military	Deployment of cyber units to counteract misinformation or communication security breaches
39	Informational	Media coverage highlighting the scale and impact of the communication deficiencies on society
39	Informational	Public government statements addressing the communication breakdown and restoration efforts
39	Informational	Media reports on the challenges faced by individuals or businesses due to communication failures
39	Informational	Use of media to inform the public about efforts to resolve communication deficiencies
39	Informational	International media coverage of the communication breakdown and its political/economic consequences
39	Informational	Use of social media to provide updates and clarify government positions regarding the communication crisis
39	Informational	Dissemination of information on alternative communication channels to mitigate the deficiencies
39	Informational	Press releases aimed at restoring public trust in government communication efforts
39	Informational	Use of mass communication to reassure the public about the progress in resolving the issue
39	Informational	Deployment of fact-checking initiatives to combat misinformation during communication breakdowns
40	Diplomatic	Government statements acknowledging the neutralisation of critical national infrastructure
40	Diplomatic	Political discussions on the need for rebuilding and securing neutralised infrastructure
40	Diplomatic	International diplomatic responses to the neutralisation of infrastructure in the country
40	Diplomatic	Increase in public awareness of the consequences of neutralised infrastructure on daily life
40	Diplomatic	Policy shifts towards investing in more resilient and secure infrastructure post-neutralisation
40	Diplomatic	Formation of emergency task forces or committees to handle the aftermath of neutralisation
40	Diplomatic	International support or aid for the rebuilding of neutralised infrastructure or assets
40	Diplomatic	National security strategies revised to mitigate future vulnerabilities in infrastructure
40	Diplomatic	Increase in legislative efforts to improve the resilience of critical national infrastructure
40	Diplomatic	Reactions from political opponents or groups regarding the government’s handling of neutralised assets
40	Economic	Economic losses resulting from the neutralisation of critical infrastructure or key assets
40	Economic	Disruption in supply chains due to the unavailability of neutralised infrastructure or assets
40	Economic	Decline in business productivity due to the destruction or neutralisation of operational infrastructure
40	Economic	Decrease in foreign investment as a result of the perceived instability caused by neutralised assets
40	Economic	Increase in government spending on repairing or replacing neutralised infrastructure and assets
40	Economic	Disruption in essential services such as energy, water, or transport following the neutralisation of assets
40	Economic	Shifts in labor markets due to infrastructure breakdown and the subsequent need for repairs
40	Economic	Impact on national GDP due to the temporary loss of neutralised assets and infrastructure
40	Economic	Increase in demand for private security and backup infrastructure systems in the aftermath of neutralisation
40	Economic	Decrease in consumer confidence due to ongoing disruptions in public services caused by neutralisation
40	Military	Deployment of military units to protect and secure critical infrastructure following its neutralisation
40	Military	Use of military resources to restore or replace neutralised infrastructure in strategic areas
40	Military	Coordination between military, law enforcement, and civilian agencies to repair or secure neutralised assets
40	Military	Deployment of military engineering units to assist in rebuilding critical infrastructure after neutralisation
40	Military	Use of military intelligence to assess the extent and impact of neutralisation on strategic assets
40	Military	Deployment of military units to prevent further neutralisation or sabotage of remaining infrastructure
40	Military	Use of military technology to restore communications or power infrastructure temporarily after neutralisation
40	Military	Protection of key assets and infrastructure from further neutralisation efforts by adversaries
40	Military	Deployment of peacekeeping forces to ensure stability in areas impacted by the neutralisation of assets
40	Military	Use of military logistics to ensure the smooth transport of essential goods during infrastructure disruptions
40	Informational	Media coverage of the neutralisation of critical infrastructure and its impact on national stability
40	Informational	Public government statements detailing the actions taken to respond to neutralised infrastructure
40	Informational	Media reports on the ongoing efforts to rebuild and restore neutralised infrastructure and assets
40	Informational	Use of media to inform the public about the causes and consequences of neutralised infrastructure
40	Informational	International media portrayal of the national crisis caused by the neutralisation of critical assets
40	Informational	Use of social media to spread awareness and rally public support for the rebuilding efforts
40	Informational	International NGOs and organisations providing reports on the humanitarian impact of neutralised infrastructure
40	Informational	Dissemination of government action plans through media on restoring essential services post-neutralisation
40	Informational	Use of public service announcements to guide citizens on how to adapt to the loss of critical infrastructure
40	Informational	Media campaigns highlighting the government’s steps in securing national assets and preventing further neutralisation
41	Diplomatic	Government responses to the casualties reported from the combat zone
41	Diplomatic	Political debates and discussions on the handling of the casualties in the combat zone
41	Diplomatic	International diplomatic reactions to the reported casualties from the combat zone
41	Diplomatic	Increase in government efforts to support the families of casualties and veterans
41	Diplomatic	Legislative changes to improve the care and compensation for combat zone casualties
41	Diplomatic	Creation of emergency relief initiatives for the casualties and affected regions
41	Diplomatic	Reactions from opposition parties on how the government is managing the combat zone casualties
41	Diplomatic	Increase in public pressure on the government to end the conflict due to rising casualties
41	Diplomatic	National discussions on the ethical implications of military engagement based on casualty reports
41	Diplomatic	Creation of task forces to support the rehabilitation of combat zone casualties
41	Economic	Economic impact of the casualties on national resources for medical care and support
41	Economic	Increase in government spending on veteran care, medical services, and casualty rehabilitation
41	Economic	Disruption of the labor market due to the loss of workforce from combat casualties
41	Economic	Increase in demand for health services and medical supplies to treat combat zone casualties
41	Economic	Shifts in national or local economies due to the impact of combat casualties on local communities
41	Economic	Financial strain on government resources to fund support systems for injured veterans
41	Economic	Impact on national GDP due to the indirect consequences of combat zone casualties
41	Economic	Increase in insurance claims or compensation payouts as a result of combat zone casualties
41	Economic	Effect on the private sector as businesses adjust to the loss of workforce from casualties
41	Economic	Increase in funding for mental health services as a response to the psychological toll of casualties
41	Military	Deployment of additional medical units to treat the injured from the combat zone
41	Military	Increase in the number of military hospitals or field medical units dedicated to treating casualties
41	Military	Coordination between military and civilian healthcare systems to manage combat zone casualties
41	Military	Use of military medical personnel to provide care and evacuate casualties from the combat zone
41	Military	Deployment of military resources to provide logistical support for casualty evacuation
41	Military	Monitoring of casualty data to assess the effectiveness of military operations in reducing injuries
41	Military	Use of military technology to improve casualty evacuation and treatment efficiency in the combat zone
41	Military	Deployment of peacekeeping forces to stabilize regions impacted by high casualty rates
41	Military	Use of military engineering units to assist in the reconstruction of areas devastated by the casualties
41	Military	Increase in military coordination with international forces to manage casualty impacts across borders
41	Informational	Media coverage of reported casualties and their impact on public opinion about the conflict
41	Informational	Public government statements on casualty numbers and the efforts to care for the injured
41	Informational	Media reports on the experiences of families affected by the casualties from the combat zone
41	Informational	Use of media to raise awareness of the mental health challenges faced by combat casualties
41	Informational	International media coverage of the casualties and the political implications of the conflict
41	Informational	Dissemination of casualty statistics through government or military channels
41	Informational	Media discussions on the effectiveness of military strategy based on casualty outcomes
41	Informational	Use of social media to share updates on casualties and mobilize public support for affected families
41	Informational	Press conferences or briefings to explain the government’s stance on the number of casualties
41	Informational	Use of media to emphasize efforts to care for veterans and combat casualties in the aftermath
42	Diplomatic	Government statements reflecting a low level of diplomatic engagement in international affairs
42	Diplomatic	Reduction in diplomatic outreach to foreign governments or international organisations
42	Diplomatic	Political discussions around the country’s decision to reduce its diplomatic efforts
42	Diplomatic	International diplomatic reactions to the state’s minimal diplomatic involvement
42	Diplomatic	Shifts in national foreign policy to focus on domestic rather than international issues
42	Diplomatic	Withdrawal from international forums or conferences due to minimal diplomatic commitment
42	Diplomatic	Reactions from opposition parties criticizing the government’s minimal diplomatic engagement
42	Diplomatic	International calls for the country to increase its diplomatic commitment and involvement
42	Diplomatic	Changes in diplomatic missions or consulate presence abroad due to reduced commitment
42	Diplomatic	National debates on the effectiveness and costs of maintaining minimal diplomatic commitment
42	Economic	Impact on international trade agreements or partnerships due to reduced diplomatic commitment
42	Economic	Decline in foreign investment as a result of the country's reduced diplomatic engagement
42	Economic	Disruption in foreign aid or development projects due to the state's minimal diplomatic commitment
42	Economic	Shifts in market dynamics caused by reduced trade negotiations and international cooperation
42	Economic	Decrease in global business confidence due to the country's passive diplomatic stance
42	Economic	Impact on foreign exchange rates due to uncertainty from minimal diplomatic interactions
42	Economic	Increase in costs for businesses seeking alternative diplomatic channels for international trade
42	Economic	Financial consequences of disengaging from economic summits or international organisations
42	Economic	Shifts in national economic policy to compensate for reduced international diplomatic engagement
42	Economic	Decrease in bilateral economic agreements as a result of minimal diplomatic commitment
42	Military	Decrease in military cooperation with allied nations due to reduced diplomatic involvement
42	Military	Reduction in joint military operations or exercises with foreign partners due to minimal commitment
42	Military	Coordination challenges with international military alliances as a result of the diplomatic disengagement
42	Military	Decline in international military aid or cooperation due to reduced diplomatic presence
42	Military	Shifts in military strategy or posture due to reduced international influence from diplomacy
42	Military	Reduction in military intelligence sharing with allied nations as a result of minimal diplomatic commitment
42	Military	Decreased participation in peacekeeping or conflict resolution missions due to diplomatic disengagement
42	Military	Decreased presence in multinational military forums as a result of minimal diplomatic participation
42	Military	Increase in national defense spending to compensate for reduced international military support
42	Military	Impact on strategic military alliances due to limited diplomatic engagement with allies
42	Informational	Media reports discussing the country’s decision to scale back its diplomatic commitments
42	Informational	Public statements by government officials explaining the reasons behind minimal diplomatic commitment
42	Informational	International media coverage of the country’s reduced participation in global diplomatic efforts
42	Informational	Discussions in international media about the consequences of minimal diplomatic commitment
42	Informational	Media criticism of the government’s disengagement from international diplomatic initiatives
42	Informational	Use of media to justify the country's minimal diplomatic stance to the domestic audience
42	Informational	Dissemination of government positions on international relations and minimal diplomatic involvement
42	Informational	International media portrayal of the country's diplomatic isolation or passivity
42	Informational	Use of public diplomacy to manage international perceptions of the country’s reduced diplomatic role
42	Informational	Use of social media to highlight the government's stance on avoiding international diplomatic commitments
43	Diplomatic	Official statements from the government acknowledging the breakdown in bilateral relations
43	Diplomatic	Political discussions or debates on the causes and consequences of broken bilateral relations
43	Diplomatic	Changes in national foreign policy to address or reflect the impact of broken bilateral relations
43	Diplomatic	Withdrawal of ambassadors or diplomatic personnel from the affected country
43	Diplomatic	Changes in diplomatic strategies or shifts in alliances following the breakdown of bilateral relations
43	Diplomatic	Increase in national security measures in response to the deterioration of bilateral relations
43	Diplomatic	International condemnation or support for the government's handling of the broken relations
43	Diplomatic	Creation of task forces or diplomatic initiatives to restore or manage the broken bilateral relations
43	Diplomatic	Impact on the government's legitimacy or credibility domestically due to the breakdown in relations
43	Diplomatic	International negotiations to attempt a resolution or mitigation of the impact of broken relations
43	Economic	Impact on trade agreements or economic partnerships due to the rupture of bilateral relations
43	Economic	Disruption of cross-border economic flows (e.g., imports/exports) caused by the broken bilateral relations
43	Economic	Decrease in foreign investment from the affected country due to diplomatic tensions
43	Economic	Increase in tariffs or sanctions as a result of the breakdown in diplomatic relations
43	Economic	Shifts in national economic policy to mitigate the impact of broken bilateral relations on key sectors
43	Economic	Impact on businesses directly involved in bilateral trade or joint ventures with the affected country
43	Economic	Increase in domestic spending to support sectors negatively affected by the loss of bilateral trade
43	Economic	Repositioning of financial and economic resources to offset losses caused by broken relations
43	Economic	Changes in supply chains and the global market due to disrupted bilateral economic ties
43	Economic	Reduction in international aid or cooperation from the affected country as a result of broken relations
43	Military	Changes in military cooperation or joint exercises with the affected country following broken bilateral relations
43	Military	Decreased participation in military alliances or coalitions with the country whose relations have broken down
43	Military	Deployment of military assets to safeguard national interests impacted by the breakdown in relations
43	Military	Increase in military readiness or alert status due to the heightened tensions from broken relations
43	Military	Use of military intelligence to monitor and respond to potential security threats stemming from broken relations
43	Military	Deployment of peacekeeping or conflict prevention forces to address regional instability resulting from broken relations
43	Military	Reduction in collaborative defense initiatives or technology sharing with the affected country
43	Military	Changes in military defense posture due to the diplomatic breakdown and its potential impact on security
43	Military	Coordination between military and intelligence agencies to assess the strategic implications of the broken relations
43	Military	Deployment of strategic military assets to prevent further escalation of tensions from broken bilateral relations
43	Informational	Media coverage of the breakdown in bilateral relations and its impact on public opinion
43	Informational	Government statements explaining the reasons for and implications of broken bilateral relations
43	Informational	International media discussions on the impact of broken bilateral relations on regional stability
43	Informational	Use of social media platforms to disseminate the government's stance on the breakdown of bilateral relations
43	Informational	Dissemination of information on the diplomatic efforts being made to repair the broken relations
43	Informational	Media criticism or praise of the government's handling of the situation leading to the breakdown in relations
43	Informational	International news outlets focusing on the consequences of broken diplomatic ties for both countries
43	Informational	Use of public service announcements to inform citizens of changes or consequences resulting from broken bilateral relations
43	Informational	Analysis and reporting on the long-term consequences of broken relations for national security and foreign policy
43	Informational	Use of media to encourage or discourage public support for the government's response to the diplomatic breakdown
44	Diplomatic	Government responses to increasing social unrest and the erosion of social cohesion
44	Diplomatic	Political discussions or debates on the causes and solutions to eroded social cohesion
44	Diplomatic	Changes in national policies aimed at addressing the fragmentation of social unity
44	Diplomatic	Increase in government efforts to promote national unity and cohesion through public programs
44	Diplomatic	Reactions from political opposition to government actions (or inactions) related to social fragmentation
44	Diplomatic	Creation of national or local initiatives aimed at rebuilding social trust and cohesion
44	Diplomatic	Political shifts or realignments caused by the social divide resulting from eroded cohesion
44	Diplomatic	Changes in government leadership or political power dynamics due to public dissatisfaction
44	Diplomatic	International recognition or concern about the internal social divisions impacting national stability
44	Diplomatic	Creation of task forces or commissions to address and heal divisions within society
44	Economic	Economic impact of eroded social cohesion on national productivity and workforce cooperation
44	Economic	Increase in government spending on social welfare and integration programs to restore cohesion
44	Economic	Shifts in the labor market or workforce dynamics caused by social fragmentation
44	Economic	Decline in consumer confidence or spending due to growing social tensions and divisions
44	Economic	Increase in social inequality due to the lack of cohesion and effective distribution of resources
44	Economic	Disruption in national economic development plans due to social unrest and fragmentation
44	Economic	Financial consequences of social instability on key industries, particularly those dependent on social cooperation
44	Economic	Decrease in foreign investment due to the perception of instability caused by eroded social cohesion
44	Economic	Impact on the tourism sector, if social fragmentation leads to a negative perception of the country
44	Economic	Increase in government spending on community development projects aimed at restoring social unity
44	Military	Increase in military presence or deployment in response to rising social unrest and eroded cohesion
44	Military	Deployment of peacekeeping forces to maintain public order and security amidst social fragmentation
44	Military	Coordination between military and law enforcement to address internal disturbances caused by social tensions
44	Military	Use of military intelligence to monitor and counteract threats arising from social fragmentation
44	Military	Deployment of military units to assist in rebuilding communities or infrastructure damaged by social unrest
44	Military	Use of military assets to provide humanitarian assistance in areas affected by social disintegration
44	Military	Shifts in military strategy or posture in response to the impact of eroded social cohesion on national security
44	Military	Coordination between military, government, and NGOs to address the socio-economic roots of social unrest
44	Military	Increase in military training focused on civil unrest management and social cohesion efforts
44	Military	Use of military logistics to support governmental efforts aimed at restoring social stability
44	Informational	Media coverage of growing social divisions and their impact on national unity and cohesion
44	Informational	Government statements on the importance of restoring social cohesion and addressing internal fragmentation
44	Informational	Media reports on the causes and consequences of eroded social cohesion within the society
44	Informational	Use of social media platforms to address and mitigate the narratives that fuel social fragmentation
44	Informational	International media coverage of social unrest and divisions within the country
44	Informational	Dissemination of government messages aimed at promoting unity and collective identity amidst social fragmentation
44	Informational	Media campaigns to educate the public about the importance of social cohesion and tolerance
44	Informational	Use of media to highlight successful efforts at restoring social unity in fragmented communities
44	Informational	International NGOs’ reports on social cohesion efforts and their impact on local communities
44	Informational	Use of public service announcements to promote messages of unity, tolerance, and national solidarity
45	Diplomatic	Government responses to the death or disappearance of prominent figures in society
45	Diplomatic	Political discussions or debates surrounding the causes and consequences of the deaths or disappearances
45	Diplomatic	Changes in national leadership or political power dynamics as a result of prominent figures' deaths or disappearances
45	Diplomatic	Increase in public concern or demand for action from the government in response to the deaths or disappearances
45	Diplomatic	Reactions from opposition parties regarding the government's handling of prominent figures' deaths or disappearances
45	Diplomatic	International diplomatic reactions or concerns regarding the deaths or disappearances of prominent figures
45	Diplomatic	Creation of investigations or commissions to address the deaths or disappearances of prominent figures
45	Diplomatic	Use of state-controlled media to manage the narrative surrounding the deaths or disappearances of important figures
45	Diplomatic	Increase in national security measures following the deaths or disappearances of prominent figures
45	Diplomatic	Impact on national legitimacy and credibility due to frequent deaths or disappearances of high-profile individuals
45	Economic	Economic impact on key sectors or industries connected to the deceased or disappeared figures
45	Economic	Decrease in foreign investment due to perceived instability following the loss of prominent figures
45	Economic	Disruption in markets or business operations associated with the death or disappearance of a key individual
45	Economic	Increase in government spending on security and public safety measures in response to high-profile deaths or disappearances
45	Economic	Impact on public services or industries heavily reliant on the involvement of the deceased or disappeared individuals
45	Economic	Shifts in national economic priorities as a result of the deaths or disappearances of prominent figures
45	Economic	Decrease in consumer confidence or spending due to uncertainty following high-profile losses
45	Economic	Financial costs of government efforts to prevent further occurrences of prominent figures' deaths or disappearances
45	Economic	Changes in global trade or diplomatic agreements due to the instability caused by the loss of prominent figures
45	Economic	Increase in demand for insurance or compensation related to the loss of key public figures
45	Military	Increase in military or security personnel deployments to protect other prominent figures in response to frequent deaths or disappearances
45	Military	Deployment of intelligence and security forces to investigate the causes of deaths or disappearances of high-profile individuals
45	Military	Coordination between military and law enforcement to enhance protection of national leaders and key figures
45	Military	Deployment of special forces to respond to or secure areas impacted by the disappearance or death of prominent figures
45	Military	Use of military resources to track down and neutralise threats linked to the deaths or disappearances
45	Military	Increase in the number of military operations aimed at maintaining national security in the aftermath of prominent figures' deaths
45	Military	Shifts in military strategy or posture to address public unrest or instability caused by the deaths or disappearances of prominent figures
45	Military	Deployment of peacekeeping or stabilisation forces to prevent social unrest following the loss of significant leaders
45	Military	Changes in military cooperation with other nations due to the diplomatic fallout from prominent figures' deaths or disappearances
45	Military	Use of military logistics to provide emergency support in the aftermath of the deaths or disappearances of high-profile individuals
45	Informational	Media coverage of the deaths or disappearances of prominent figures and their impact on public opinion
45	Informational	Government statements regarding the causes and official positions on the deaths or disappearances of high-profile individuals
45	Informational	Media reports on the investigation or circumstances surrounding the deaths or disappearances
45	Informational	Use of social media platforms to spread news or opinions about the deaths or disappearances of notable figures
45	Informational	International media coverage of the events surrounding the deaths or disappearances of prominent figures
45	Informational	Media campaigns to control the narrative regarding the reasons and consequences of prominent figures' deaths or disappearances
45	Informational	Press conferences or official statements to address public concerns and provide information on the government’s response
45	Informational	Dissemination of government efforts to investigate or prevent further occurrences of high-profile deaths or disappearances
45	Informational	Use of media to reassure the public about national security measures following the loss of prominent figures
45	Informational	Use of public service announcements to guide the public on how to handle the information and prevent further unrest
46	Diplomatic	Government responses to the erosion of authority or legitimacy due to compromised governance
46	Diplomatic	Political debates and discussions on the causes of governance compromise and how to address it
46	Diplomatic	Increase in public dissatisfaction or protests against compromised governance
46	Diplomatic	Political shifts or realignments within the government in response to compromised governance
46	Diplomatic	Creation of national or local initiatives to restore trust in government institutions
46	Diplomatic	International diplomatic reactions or pressures related to the perceived breakdown in governance
46	Diplomatic	Formation of investigative commissions or task forces to examine the root causes of compromised governance
46	Diplomatic	Reactions from opposition parties or political rivals capitalising on compromised governance to gain support
46	Diplomatic	Increase in government accountability measures to restore public confidence in governance structures
46	Diplomatic	Reform initiatives or policy changes aimed at addressing and rectifying compromised governance
46	Economic	Economic impact of compromised governance on national productivity and market stability
46	Economic	Decrease in foreign investment due to the perception of weak or unstable governance
46	Economic	Disruption in key industries or sectors due to lack of effective governance and regulation
46	Economic	Increase in government spending to address inefficiencies or failures resulting from compromised governance
46	Economic	Impact on national trade agreements or partnerships due to the uncertainty created by compromised governance
46	Economic	Shifts in national economic priorities as a result of governance failures and public dissatisfaction
46	Economic	Decrease in consumer confidence and public spending due to instability in governance
46	Economic	Impact on the labor market due to the weakening of institutions that support economic activities
46	Economic	Increase in public spending on security and social programs to mitigate the effects of governance breakdown
46	Economic	Financial consequences of government instability on local businesses and international trade
46	Military	Increase in military deployments to restore stability and maintain public order in response to compromised governance
46	Military	Coordination between military, law enforcement, and government agencies to address threats arising from governance failures
46	Military	Deployment of military units to protect critical infrastructure and institutions from social unrest
46	Military	Shifts in military strategy to address internal instability caused by the collapse of governance structures
46	Military	Use of military intelligence to assess threats to national security arising from governance compromises
46	Military	Deployment of peacekeeping forces to support governance structures in regions experiencing instability
46	Military	Increase in military readiness to prevent escalation of instability resulting from compromised governance
46	Military	Coordination with international military forces to stabilize the situation and restore governance credibility
46	Military	Use of military logistics to deliver humanitarian aid and resources to areas affected by governance breakdown
46	Military	Increase in internal military operations aimed at supporting government institutions affected by compromised governance
46	Informational	Media coverage of the erosion of governance and its impact on national stability
46	Informational	Government statements addressing the causes of compromised governance and efforts to restore order
46	Informational	International media reports on the political and social consequences of compromised governance
46	Informational	Use of social media to spread awareness of the implications of compromised governance on public life
46	Informational	Media discussions on the potential solutions to address the governance crisis and restore stability
46	Informational	International news coverage of the government’s failure to uphold its responsibilities due to compromised governance
46	Informational	Dissemination of government positions through media to clarify the efforts being made to restore governance
46	Informational	Use of media to educate the public on the government’s plan to reform and regain trust
46	Informational	Media campaigns to control public perception of governance failure and manage unrest
46	Informational	Press conferences or briefings to update the public on the steps being taken to address compromised governance
47	Diplomatic	Changes in national immigration policies due to increased emigration
47	Diplomatic	Statements from government officials addressing the reasons for emigration
47	Diplomatic	International negotiations or agreements related to emigration trends
47	Diplomatic	Changes in diplomatic relations with countries receiving emigrants
47	Diplomatic	Introduction of programs or incentives to counter emigration rates
47	Diplomatic	Discussions in international forums about the impact of emigration
47	Diplomatic	Impact on national security policies due to increased emigration
47	Diplomatic	Legal frameworks created to manage or restrict emigration flows
47	Diplomatic	Impact on national identity discourse due to significant emigration trends
47	Diplomatic	International aid or intervention aimed at addressing emigration concerns
47	Economic	Impact on national labour market due to the loss of skilled workers
47	Economic	Decrease in tax revenues due to emigration of high-income individuals
47	Economic	Increase in remittances from emigrants back to the country of origin
47	Economic	Shifts in domestic consumption patterns due to lower population levels
47	Economic	Changes in property markets due to the emigration of households
47	Economic	Impact on local economies in regions experiencing high emigration
47	Economic	Increased demand for relocation services and emigration-related industries
47	Economic	Changes in wage levels in sectors affected by emigration
47	Economic	Decrease in consumer spending due to reduced population
47	Economic	Impact on social welfare programs due to the emigration of beneficiaries
47	Military	Increased demand for border security and control due to rising emigration
47	Military	Deployment of military personnel for border protection to control emigration
47	Military	Coordination between military and local law enforcement to manage migration
47	Military	Use of military technology to monitor and detect illegal emigration routes
47	Military	Deployment of military personnel to aid in evacuations during political unrest leading to emigration
47	Military	Protection of key infrastructure affected by the potential loss of skilled personnel
47	Military	Engagement in international military missions related to emigration crisis management
47	Military	Provision of humanitarian aid by military units to emigrants or migrants
47	Military	Deployment of special forces to combat human trafficking and illegal emigration networks
47	Military	Training military units to provide support for emigrant populations in foreign countries
47	Informational	Media coverage of increasing emigration trends and its causes
47	Informational	Reporting on government responses to high emigration rates
47	Informational	Public statements on the socio-economic impact of emigration
47	Informational	Use of media to highlight stories of emigrants and their experiences abroad
47	Informational	International news reporting on emigration as a national crisis or issue
47	Informational	Dissemination of government efforts to control or reverse emigration
47	Informational	Social media platforms discussing the personal motivations behind emigration
47	Informational	Use of media to encourage or discourage emigration through propaganda
47	Informational	International media portrayal of emigration as a symptom of instability
47	Informational	Use of digital media campaigns to address the public perception of emigration
48	Diplomatic	Government responses to the provision of basic humanitarian assistance during crises
48	Diplomatic	Political discussions or debates on the scope and effectiveness of the provided humanitarian assistance
48	Diplomatic	International diplomatic reactions to the country’s role in providing humanitarian assistance
48	Diplomatic	Increase in government-led initiatives to expand access to humanitarian assistance for affected populations
48	Diplomatic	Shifts in national policy to ensure long-term sustainability and effectiveness of humanitarian aid programs
48	Diplomatic	Creation of task forces or agencies dedicated to coordinating the provision of basic humanitarian assistance
48	Diplomatic	National public support for or opposition to the government's handling of humanitarian assistance distribution
48	Diplomatic	Increase in international partnerships or collaborations to ensure comprehensive humanitarian aid delivery
48	Diplomatic	International recognition or criticism regarding the country’s efforts to provide basic humanitarian assistance
48	Diplomatic	Formation of agreements or protocols with international organisations to streamline the provision of humanitarian assistance
48	Economic	Economic impact of providing basic humanitarian assistance on national resources and budget allocation
48	Economic	Increase in government spending on humanitarian aid, including food, shelter, and medical care for affected populations
48	Economic	Disruption in domestic economic activity due to resource allocation for humanitarian assistance
48	Economic	Shifts in national economic priorities to accommodate the provision of aid to crisis-stricken populations
48	Economic	Financial assistance or donations from international partners to support the government's humanitarian aid efforts
48	Economic	Decrease in domestic economic performance as a result of resource diversion to humanitarian aid efforts
48	Economic	Increase in demand for goods and services required for humanitarian assistance (e.g., medical supplies, food)
48	Economic	Financial strain on government or private sector due to increased spending on humanitarian aid programs
48	Economic	Impact on businesses or industries that provide humanitarian supplies or services to government or NGOs
48	Economic	Boost to the local economy in areas receiving aid due to increased demand for services and goods
48	Military	Military deployment to assist in the delivery and distribution of basic humanitarian assistance
48	Military	Coordination between military and humanitarian organisations to ensure the safe delivery of aid to affected areas
48	Military	Use of military logistics and transport capabilities to deliver food, water, and medical supplies to crisis zones
48	Military	Deployment of military units to secure areas receiving humanitarian assistance from potential threats or violence
48	Military	Use of military engineering units to build temporary shelters or infrastructure to facilitate aid delivery
48	Military	Shifts in military strategy to include humanitarian assistance as part of stabilization or peacekeeping operations
48	Military	Increase in military cooperation with international aid agencies to provide humanitarian relief to conflict zones
48	Military	Monitoring and securing transport routes for the distribution of humanitarian supplies using military resources
48	Military	Deployment of peacekeeping forces or stabilization units to ensure the safe delivery of humanitarian aid
48	Military	Use of military communication channels to coordinate the humanitarian aid efforts with other agencies and governments
48	Informational	Media coverage of government and international efforts to provide basic humanitarian assistance during crises
48	Informational	Government statements on the scope, goals, and successes of humanitarian assistance efforts
48	Informational	Use of media to highlight the suffering of affected populations and the importance of providing aid
48	Informational	Dissemination of information on how the public can contribute to or support humanitarian aid efforts
48	Informational	International media portrayal of the country’s humanitarian aid initiatives and their impact on affected regions
48	Informational	Reports on the effectiveness of the delivered aid, including the challenges and successes of relief efforts
48	Informational	Use of social media to engage citizens in supporting humanitarian assistance programs or fundraising efforts
48	Informational	Press conferences or media briefings to update the public on the status and needs of humanitarian assistance efforts
48	Informational	Use of media to share stories of those receiving humanitarian aid, emphasizing the impact of support on local communities
48	Informational	International NGO coverage on the provision of basic humanitarian assistance, detailing operational successes or difficulties
49	Diplomatic	National government responses to the economic recession, including policy adjustments
49	Diplomatic	Changes in national fiscal policy in response to the recession
49	Diplomatic	Impact on national governance and leadership due to the widespread recession
49	Diplomatic	Diplomatic efforts to secure international aid or loans to address the recession
49	Diplomatic	Discussions in international forums about the causes and impact of the national recession
49	Diplomatic	Implementation of austerity measures or economic reforms to mitigate recession effects
49	Diplomatic	Introduction of public assistance programs to support those affected by the recession
49	Diplomatic	Impact on national security policies due to the economic downturn
49	Diplomatic	Changes in political stability and public trust as a result of the recession
49	Diplomatic	Impact of recession on the electoral outcomes or political climate in the country
49	Economic	Decrease in national GDP due to the widespread recession
49	Economic	Increased unemployment rates as a result of business closures and economic slowdown
49	Economic	Decline in consumer spending due to lower disposable income and reduced confidence
49	Economic	Decreased foreign direct investment as a result of the economic downturn
49	Economic	Reduction in industrial production and manufacturing output during the recession
49	Economic	Increase in bankruptcies and company closures due to the challenging economic environment
49	Economic	Shifts in labour market trends, with a higher demand for low-skill, low-wage jobs
49	Economic	Decline in the value of national currency due to recessionary pressures
49	Economic	Increased inflation rates as a consequence of economic contraction
49	Economic	Reduction in government tax revenues due to lower economic activity
49	Military	Impact on military budget allocations due to the economic recession
49	Military	Reallocation of military resources to support domestic economic recovery initiatives
49	Military	Deployment of military units for humanitarian relief in response to economic hardships
49	Military	Use of military logistics and capabilities to support economic recovery programs
49	Military	Deployment of peacekeeping forces to maintain stability in economically distressed areas
49	Military	Protection of strategic national infrastructure to ensure continuity in the recession
49	Military	Deployment of special forces to support economic security operations, such as anti-smuggling
49	Military	Reorientation of military priorities to assist with non-military aspects of the economy
49	Military	Use of military personnel in public works programs to assist in economic recovery efforts
49	Military	Provision of medical and social services by military units to mitigate recession impacts on civilians
49	Informational	Media coverage of the national recession, including causes, effects, and government responses
49	Informational	International media portrayal of the recession's impact on the country's economy
49	Informational	Use of media by the government to communicate its plans for economic recovery
49	Informational	Reporting on the socio-economic challenges faced by ordinary citizens during the recession
49	Informational	Dissemination of government efforts to stabilize the national economy during the recession
49	Informational	Use of social media to discuss the economic downturn and its impact on communities
49	Informational	Media portrayal of the recession as a threat to national security and stability
49	Informational	Public debates and discussions in media outlets on how to address the recession
49	Informational	Use of media to highlight the government's efforts to manage public discontent during the recession
49	Informational	International NGO reports and media coverage on the humanitarian impacts of the recession
50	Diplomatic	International diplomatic efforts to implement economic sanctions
50	Diplomatic	National government announcements explaining the rationale for imposing sanctions
50	Diplomatic	Creation of legal frameworks to enforce and regulate economic sanctions
50	Diplomatic	Shifts in national policy as a response to international economic sanctions
50	Diplomatic	Impact on diplomatic relations with countries subject to economic sanctions
50	Diplomatic	Formation of international coalitions to implement economic sanctions
50	Diplomatic	International negotiations on the scope and targets of the economic sanctions
50	Diplomatic	Impact on national sovereignty due to the enforcement of economic sanctions
50	Diplomatic	Changes in national policy to mitigate the impact of economic sanctions on domestic interests
50	Diplomatic	International forums and discussions on the effectiveness and fairness of economic sanctions
50	Economic	Decrease in national GDP due to the impact of economic sanctions
50	Economic	Reduction in foreign trade volumes due to restrictions imposed by sanctions
50	Economic	Disruption in key industries (e.g., energy, finance) as a result of sanctions
50	Economic	Decrease in foreign investment due to sanctions-related uncertainty
50	Economic	Shifts in labour markets affected by industries targeted by economic sanctions
50	Economic	Increase in the costs of goods and services due to import/export restrictions
50	Economic	Financial losses in sectors directly impacted by economic sanctions
50	Economic	Increase in the informal or black market as a result of sanctions
50	Economic	Impact on local businesses as a result of decreased international trade
50	Economic	Increase in government spending to offset the economic impacts of sanctions
50	Military	Deployment of military forces to protect critical infrastructure targeted by sanctions
50	Military	Use of military intelligence to track and prevent sanctions evasion or loophole exploitation
50	Military	Coordination between military and law enforcement to enforce sanctions and prevent illegal trade
50	Military	Protection of key industries and resources from foreign exploitation due to sanctions
50	Military	Deployment of military assets to secure transportation routes for sanctioned goods
50	Military	Monitoring international borders to prevent the illegal movement of sanctioned goods
50	Military	Deployment of special forces to combat smuggling and the circumvention of sanctions
50	Military	Use of military technology to monitor compliance with economic sanctions
50	Military	Deployment of peacekeeping forces to maintain stability in areas impacted by sanctions
50	Military	Use of military logistics to ensure the effective distribution of humanitarian aid amidst sanctions
50	Informational	Media coverage of the establishment of economic sanctions and their impact
50	Informational	Public government statements on the objectives and justifications for the sanctions
50	Informational	International media portrayal of the national economy under economic sanctions
50	Informational	Use of media to explain the benefits and costs of economic sanctions to the public
50	Informational	Reporting on the effectiveness of economic sanctions and the consequences for affected industries
50	Informational	International NGO statements on the humanitarian consequences of economic sanctions
50	Informational	Use of media to inform the public about government efforts to mitigate the effects of sanctions
50	Informational	Dissemination of information on the international response to the sanctions
50	Informational	Use of social media to highlight the effects of the sanctions on local businesses and consumers
50	Informational	Media discussions on the legality and morality of imposing economic sanctions
51	Diplomatic	National government's response to localised damage to infrastructure or assets
51	Diplomatic	International diplomatic efforts to address the localised damage to infrastructure or assets
51	Diplomatic	Changes in domestic policies to mitigate infrastructure vulnerability
51	Diplomatic	Creation of legal frameworks to facilitate reconstruction after localised damage
[truncated: 1,674 more rows]

## Sheet: Diplomatic Ways & Means
Diplomatic Means	Diplomatic Ways
Bureaucrats	Observance of bilateral relations
Ministers	Trading in influence
Senators	Diplomatic support
Ambassadors	Deliberate omission
Diplomatic representative	Discursive politics
Politically influential figures	Political campaign
Legislative bodies	Centralisation of power
Judiciary	Politics of reaffirmation
International courts	Expropriations
International assemblies	Lobbying
Diplomatic channels	Public incitement
Forum	Lawfare
Constitution	Denial of the exercise of rights
Laws	Coalitions
Decrees	Breakdown of bilateral relations
Resolutions	Non-observance of agreements
Plans	Termination of cooperation agreements
Agreement	Instrumentalisation of nationalism
Speech	Instrumentalisation of socialism
Statement	Instrumentalisation of populism
Underlying political message	Instrumentalisation of conservatism
Public documents	Political censorship
National broadcast	Isolationism
Political symbols	International integration
Allies	Instrumentalisation of religion
Political opponents	Generation of dependency
Supportive electorate	Bilateral summit
Opposing electorate
Neutral electorate
Public opinion
Attendance at events
Power of veto
Visas
Religious followers
Immigrants

## Sheet: Informational Ways & Means
Informational Means	Informational Ways
Intelligence agencies	Narrative construction
State-controlled news agencies	Narrative influence
Military cybersecurity teams	Dissemination of alternative narratives
The academy	Dissemination of conspiracy theories
Media outlets	Event recontextualisation campaign
National media outlets	Visual testimony campaign
International media outlets	Audience attention redirection
Press	Use of subliminal information and symbolism
Broadcasters	Disinformation campaign
Controlled news portals	Propaganda campaigns
Fact-checking platforms	Media censorship
Alternative media platforms	Activation of international communication and influence networks
Social media platforms	Cyber operations against media
Digital platforms	Infiltration in forums and online communities
Audio-visual content platforms	Trend positioning on social media
International dissemination platforms	Viral content generation
Transnational dissemination networks	Facilitation of resistance communications
Social networks	Leakage of sensitive information
Podcasts or digital audio channels	Data and statistics manipulation
Private messaging applications (WhatsApp, Telegram)	Public opinion manipulation
Forums or digital communities (Reddit, Quora)	Media echo expansion
Blogs	Psychological operations
Films and documentaries	Propaganda dissemination operations
Broadcast and communication devices	Combined joint exercises
Documents produced in support of the narrative	Force demosntration
Classified documents	Civil-military operations
Fake news	Demonstrative signaling operations
Journalist	Harassment
Influencers or digital content creators	Shadowing
Renowned or popular personalities	Legal signalling
Target audience	Discursive denial of the exercise of rights
Bots	Public denial of rights claim
Fake accounts	Surveillance
Technology for media control	Strategic Intelligence gathering operations
Censorship and surveillance systems	Force confrontation
Communication stations	Harassing communications
Restrictive measures	Communications disruption
Target information space	Signal interference
Target cognitive dimension	Official publication
AI-based predictive language systems	Open claim
Official Documents	Public denial
	Formal complaint
	International transmition
	Territorial demarcation
	Sea demarcation
	Land demarcation
	Air demarcation

## Sheet: Military Ways & Means
Military Means	Military Ways
Intelligence assets	Offensive combat operations
Navy	Defensive combat operations
Army	Counterinsurgency operations
Air Force	Crisis response operations
Special forces	Covert operations
Non-conventional forces	Guerrilla support operations
Security forces	Foreign internal defence operations
Host nation security forces	Assassination operations
Insurgent groups	Mass killing operations
Collaborators	Attrition operations
Target population	Sabotage operations
High-value individuals	Essential infrastructure destruction operations
Military communication technology	Interdiction operations
Communication channels	Strategic attack operations
Armed forces media	Precision strike operations
Critical infrastructure	Blockade operations
Target land spaces	Anti-access operations
Target airspaces	Area denial operations
Target maritime spaces	Exclusion zone control operations
Target space domain	Sea control
Target cyberspace	Sea denial
Nuclear arsenal	Maritime platform construction
Armament	Occupation through ports, bases, and airfields
Aircrafts	Military operations contributing to sanctions
Warships	Cyber attack operations
Militia	Cyber espionage operations
	Tactical Intelligence gathering operations
	Production and development of armament
	Nuclear deterrence
	Showing the flag
	Strategic weapon placed into active service
	Nuclear weapons developed and produced
	Nuclear warships, aircraft, and submarines produced

## Sheet: Economic Ways & Means
Economic Means	Economic Ways
International trade	Debt accumulation
Investment funds	Financial dependence
Financial markets	Facilitation of financing
Foreign exchange markets	Closure of financing
Retail market	Limitation of transfers
Commodity markets	Fiscal pressure
Global markets	Tariff burden
International banking system	Reduction of subsidies
National banking system	Economic subsidy
Foreign trade system	Economic sanctions
Public services infrastructure	Price manipulation
Fiscal systems	Stock market manipulation
Monetary systems	Domestic market manipulation
International financial institutions	Trade blockade
International payment systems	Economic boycott
Transport infrastructure	Market access prohibition
Energy infrastructure	Trade disruption
Industrial infrastructure	Foreign investment restrictions
Technological infrastructure	Withdrawal of investments
Logistics and supply systems	Asset freezing
Critical supply distribution systems	Resource restriction
Trade routes	Technological restriction
Commercial hubs	Expansion of critical infrastructure
Free trade zones	Economic redistribution
Commodities	Consumption stimulus
Demography	Population incentive
Labour force	Aerial and maritime logistics blockade
Investors	Regional economic integration
Suppliers
Key economic actors
Business leaders
Economic decision-makers
Central banks
Fishing vessels
State-Owned Enterprises (SOEs)

## Sheet: Code_Output
Fact ID		Source URL	Query	Date of the Fact	Text	Effect ID	Int. of For.	Inst	Strategic Effect (Top 3)	Indicators (Top 2)	Ways (Top 4)	Means (Top 4)	V. H.	H	M	L			War-Peace (x)	Direct-Indirect (y)	Leg. - Illeg.(z)	Conceptual Space	Threshold	Conflcit-Comp
01	1	https://theaviationgeekclub.com/when-china-took-control-of-the-paracel-islands-after-defeating-south-vietnam-the-us-did-not-lend-help-to-the-south-vietnamese/	2026-01-18	1973-01	When China took control of the Paracel Islands after defeating South Vietnam (The US did not lend help to the South Vietnamese) By Dario Leone Oct 17 2023 Sponsored by: Helion & Company In this article: Paracel Islands had been claimed by South Vietnam and China since the departure of the French from their Indochina colony in 1955. A new nature of the relationship between the US and China Paracel…	57	-0.4;-0.2	M	Occupied strategic territory (Score 0.448)	Military: Engagement in military operations to neutralize opposition or insurgent forces in the occupied territory (Score 0.448) Military: Deployment of military forces to maintain control and security of the occupied strategic territory (Score 0.427)	Military (*) Occupation through ports, bases, and airfields (Score 0.454) Maritime platform construction (Score 0.448) Tactical Intelligence gathering operations (Score 0.415) Informational Force confrontation (Score 0.43)	Military (*) Warships (Score 0.612) Target maritime spaces (Score 0.481) Navy (Score 0.444) Economic Fishing vessels (Score 0.475)	M	D	I	E	Sample		-0.42	0.72	-1	#NAME?	0.1:-0.1	Conflcit
01	1	https://www.thetrumpet.com/28161-china-releases-new-map-claiming-neighbors-territory?gad_source=1&gad_campaignid=23255341856&gbraid=0AAAABA59_gohLOlAfQXfvpgdJFd5HGppo&gclid=CjwKCAiA4KfLBhB0EiwAUY7GAUUDUsyqguC4BMtSbrDT8Yoq1qWTSxnFS2-8FiM7NC8vWrGguQce6BoC4gwQAvD_BwE	2026-01-18	1973-01	When China took control of the Paracel Islands after defeating South Vietnam (The US did not lend help to the South Vietnamese) By Dario Leone Oct 17 2023 Sponsored by: Helion & Company In this article: Paracel Islands had been claimed by South Vietnam and China since the departure of the French from their Indochina colony in 1955. A new nature of the relationship between the US and China Paracel…	83	-0.2;0.0	I	Information disseminated with a focus on disputed strategic territories (Score 0.447)	Diplomatic: Creation of narratives highlighting historical ties and sovereign claims over disputed strategic territories (Score 0.459) Military: Engagement in national campaigns emphasizing defense of sovereignty over disputed strategic territories (Score 0.43)	Military Occupation through ports, bases, and airfields (Score 0.454) Maritime platform construction (Score 0.448) Tactical Intelligence gathering operations (Score 0.415) Informational Force confrontation (Score 0.43)	Military Warships (Score 0.612) Target maritime spaces (Score 0.481) Navy (Score 0.444) Economic Fishing vessels (Score 0.475)	I	D	M	E						#NAME?
01	1	https://www.thetrumpet.com/28161-china-releases-new-map-claiming-neighbors-territory?gad_source=1&gad_campaignid=23255341856&gbraid=0AAAABA59_gohLOlAfQXfvpgdJFd5HGppo&gclid=CjwKCAiA4KfLBhB0EiwAUY7GAUUDUsyqguC4BMtSbrDT8Yoq1qWTSxnFS2-8FiM7NC8vWrGguQce6BoC4gwQAvD_BwE	2026-01-18	1973-01	When China took control of the Paracel Islands after defeating South Vietnam (The US did not lend help to the South Vietnamese) By Dario Leone Oct 17 2023 Sponsored by: Helion & Company In this article: Paracel Islands had been claimed by South Vietnam and China since the departure of the French from their Indochina colony in 1955. A new nature of the relationship between the US and China Paracel…	29	-0.6;-0.4	M	Weakened international alliances (Score 0.44)	Military: Shifts in military priorities or strategies due to weakened international alliances (Score 0.442) Diplomatic: Shifts in national foreign policy due to weakened international alliances (Score 0.441)	Military Occupation through ports, bases, and airfields (Score 0.454) Maritime platform construction (Score 0.448) Tactical Intelligence gathering operations (Score 0.415) Informational Force confrontation (Score 0.43)	Military Warships (Score 0.612) Target maritime spaces (Score 0.481) Navy (Score 0.444) Economic Fishing vessels (Score 0.475)	D	I	E	M						#NAME?
02	2	https://www.rfa.org/english/news/vietnam/anniversary-03132018160914.html	2026-01-18	1988-03	Vietnam Marks Anniversary of Naval Clash With China Over Spratly Island Reefs 2018.03.13 Social media sharing button Vietnamese demonstrators chant anti-China slogans during a rally in Hanoi marking the anniversary of a 1988 battle between Vietnam and China in the Spratly Islands, March 14, 2016. Vietnamese demonstrators chant anti-China slogans during a rally in Hanoi marking the anniversary of …	58	-0.4;-0.2	M	Militarised disputed territory (Score 0.493)	Military: Strategic use of air, naval, and ground forces to assert territorial claims in disputed territories (Score 0.455) Diplomatic: International calls for demilitarisation and peacebuilding efforts in disputed territories (Score 0.453)	Military (*) Sea denial (Score 0.496) Informational Sea demarcation (Score 0.534) Territorial demarcation (Score 0.484) Land demarcation (Score 0.435)	Military (*) Target maritime spaces (Score 0.463) Warships (Score 0.425) Diplomatic International courts (Score 0.436) Economic Fishing vessels (Score 0.42)	D	M	E	I	Sample		-0.43	0.73	-0.9	#NAME?	0.1:-0.1	Conflcit
02	2	https://www.rfa.org/english/news/vietnam/anniversary-03132018160914.html	2026-01-18	1988-03	Vietnam Marks Anniversary of Naval Clash With China Over Spratly Island Reefs 2018.03.13 Social media sharing button Vietnamese demonstrators chant anti-China slogans during a rally in Hanoi marking the anniversary of a 1988 battle between Vietnam and China in the Spratly Islands, March 14, 2016. Vietnamese demonstrators chant anti-China slogans during a rally in Hanoi marking the anniversary of …	83	-0.2;0.0	I	Information disseminated with a focus on disputed strategic territories (Score 0.474)	Diplomatic: Emphasis on sovereignty and self-determination regarding disputed strategic territories in official information (Score 0.495) Economic: Reduction in foreign investment resulting from information campaigns reinforcing sovereignty claims over disputed strategic territories (Score 0.455)	Military Sea denial (Score 0.496) Informational Sea demarcation (Score 0.534) Territorial demarcation (Score 0.484) Land demarcation (Score 0.435)	Military Target maritime spaces (Score 0.463) Warships (Score 0.425) Diplomatic International courts (Score 0.436) Economic Fishing vessels (Score 0.42)	I	D	M	E						#NAME?
02	2	https://www.rfa.org/english/news/vietnam/anniversary-03132018160914.html	2026-01-18	1988-03	Vietnam Marks Anniversary of Naval Clash With China Over Spratly Island Reefs 2018.03.13 Social media sharing button Vietnamese demonstrators chant anti-China slogans during a rally in Hanoi marking the anniversary of a 1988 battle between Vietnam and China in the Spratly Islands, March 14, 2016. Vietnamese demonstrators chant anti-China slogans during a rally in Hanoi marking the anniversary of …	15	-1.0;-0.8	D	Rejected binding international legal ruling (Score 0.438)	Diplomatic: National government’s official statement rejecting the binding international legal ruling (Score 0.415) Diplomatic: Changes in bilateral or multilateral relations as a result of rejecting the ruling (Score 0.41)	Military Sea denial (Score 0.496) Informational Sea demarcation (Score 0.534) Territorial demarcation (Score 0.484) Land demarcation (Score 0.435)	Military Target maritime spaces (Score 0.463) Warships (Score 0.425) Diplomatic International courts (Score 0.436) Economic Fishing vessels (Score 0.42)	I	D	M	E						#NAME?
03	3	https://www.nytimes.com/1995/02/19/world/manila-sees-china-threat-on-coral-reef.html	2026-01-18	1995-02	By Philip Shenon Feb. 19, 1995 Manila Sees China Threat On Coral Reef Credit...The New York Times Archives See the article in its original context from February 19, 1995, Section 1, Page 9Buy Reprints View on timesmachine TimesMachine is an exclusive benefit for home delivery and digital subscribers. About the Archive This is a digitized version of an article from The Times’s print archive, befor…	88	-0.2;0.0	M	Intimidated foreign military presence (Score 0.427)	Military: Expansion of military infrastructure to counter foreign military operations perceived as threatening (Score 0.485) Informational: Public government statements highlighting the negative impact of foreign military forces on national security (Score 0.451)	Military Maritime platform construction (Score 0.423) Foreign internal defence operations (Score 0.42) Strategic attack operations (Score 0.412) Informational Official publication (Score 0.486)	Military Security forces (Score 0.477) Host nation security forces (Score 0.44) Economic Fishing vessels (Score 0.41) Informational Official Documents (Score 0.4)	I	D	M	E						#NAME?
03	3	https://www.nytimes.com/1995/02/19/world/manila-sees-china-threat-on-coral-reef.html	2026-01-18	1995-02	By Philip Shenon Feb. 19, 1995 Manila Sees China Threat On Coral Reef Credit...The New York Times Archives See the article in its original context from February 19, 1995, Section 1, Page 9Buy Reprints View on timesmachine TimesMachine is an exclusive benefit for home delivery and digital subscribers. About the Archive This is a digitized version of an article from The Times’s print archive, befor…	57	-0.4;-0.2	M	Occupied strategic territory (Score 0.423)	Military: Engagement in military operations to neutralize opposition or insurgent forces in the occupied territory (Score 0.433) Military: Deployment of military forces to maintain control and security of the occupied strategic territory (Score 0.431)	Military (*) Maritime platform construction (Score 0.423) Foreign internal defence operations (Score 0.42) Strategic attack operations (Score 0.412) Informational Official publication (Score 0.486)	Military Security forces (Score 0.477) Host nation security forces (Score 0.44) Economic (*) Fishing vessels (Score 0.41) Informational Official Documents (Score 0.4)	M	D	I	E	Sample		-0.44	-0.84	-0.7	#NAME?	0.1:-0.1	Conflcit
03	3	https://www.nytimes.com/1995/02/19/world/manila-sees-china-threat-on-coral-reef.html	2026-01-18	1995-02	By Philip Shenon Feb. 19, 1995 Manila Sees China Threat On Coral Reef Credit...The New York Times Archives See the article in its original context from February 19, 1995, Section 1, Page 9Buy Reprints View on timesmachine TimesMachine is an exclusive benefit for home delivery and digital subscribers. About the Archive This is a digitized version of an article from The Times’s print archive, befor…	89	-0.2;0.0	M	Obstructed foreign logistical operations (Score 0.42)	Military: Deployment of military forces to secure national infrastructure from the consequences of obstructed logistical operations (Score 0.485) Military: Engagement in military operations to ensure national security in response to international logistical disruptions (Score 0.447)	Military Maritime platform construction (Score 0.423) Foreign internal defence operations (Score 0.42) Strategic attack operations (Score 0.412) Informational Official publication (Score 0.486)	Military Security forces (Score 0.477) Host nation security forces (Score 0.44) Economic Fishing vessels (Score 0.41) Informational Official Documents (Score 0.4)	I	D	M	E						#NAME?
04	4	https://www.theguardian.com/world/2001/apr/02/usa.china?utm	2026-01-18	2001-04	This article is more than 24 years old US and Chinese planes clash This article is more than 24 years old Special report: George Bush's America John Gittings in Shanghai, Martin Kettle in Washington and Richard Norton-Taylor Mon 2 Apr 2001 10.57 BST Share The worsening relationship between China and the United States faced its first serious crisis of the George Bush era yesterday when an American…	59	-0.2;0.0	D	Experienced diplomatic tension (Score 0.613)	Diplomatic: Shifts in diplomatic relations between the country and its key allies due to tensions (Score 0.619) Informational: Reports on the impact of diplomatic tensions on bilateral or multilateral relations (Score 0.537)	Diplomatic Diplomatic support (Score 0.441) Observance of bilateral relations (Score 0.399) Breakdown of bilateral relations (Score 0.378) Informational Force confrontation (Score 0.378)	Military Aircrafts (Score 0.371) Diplomatic Diplomatic channels (Score 0.416) Allies (Score 0.351)	I	D	M	E						#NAME?
04	4	https://www.theguardian.com/world/2001/apr/02/usa.china?utm	2026-01-18	2001-04	This article is more than 24 years old US and Chinese planes clash This article is more than 24 years old Special report: George Bush's America John Gittings in Shanghai, Martin Kettle in Washington and Richard Norton-Taylor Mon 2 Apr 2001 10.57 BST Share The worsening relationship between China and the United States faced its first serious crisis of the George Bush era yesterday when an American…	65	-0.2;0.0	D	Experienced occasional frictions in international relations (Score 0.515)	Diplomatic: Shifts in diplomatic relations with specific countries involved in the frictions (Score 0.574) Diplomatic: Increase in diplomatic disagreements between the country and its key international partners (Score 0.57)	Diplomatic (*) Diplomatic support (Score 0.441) Observance of bilateral relations (Score 0.399) Breakdown of bilateral relations (Score 0.378) Informational Force confrontation (Score 0.378)	Military (*) Aircrafts (Score 0.371) Diplomatic Diplomatic channels (Score 0.416) Allies (Score 0.351)	D	I	E	M	Sample		-0.12	-0.85	-0.8	#NAME?	0.1:-0.1	Conflcit
04	4	https://www.theguardian.com/world/2001/apr/02/usa.china?utm	2026-01-18	2001-04	This article is more than 24 years old US and Chinese planes clash This article is more than 24 years old Special report: George Bush's America John Gittings in Shanghai, Martin Kettle in Washington and Richard Norton-Taylor Mon 2 Apr 2001 10.57 BST Share The worsening relationship between China and the United States faced its first serious crisis of the George Bush era yesterday when an American…	28	-0.6;-0.4	D	Neutralised diplomatic cooperation (Score 0.506)	Diplomatic: Changes in diplomatic relations as a result of neutralized commitments (Score 0.57) Informational: Use of media to explain the long-term consequences of neutralized diplomatic relationships (Score 0.534)	Diplomatic Diplomatic support (Score 0.441) Observance of bilateral relations (Score 0.399) Breakdown of bilateral relations (Score 0.378) Informational Force confrontation (Score 0.378)	Military Aircrafts (Score 0.371) Diplomatic Diplomatic channels (Score 0.416) Allies (Score 0.351)	D	I	E	M						#NAME?
05	5	https://www.stripes.com/news/2009-03-10/pentagon-five-chinese-vessels-harass-us-ship-1988887.html	2026-01-18	2009-03	Pentagon: Five Chinese vessels harass U.S. ship By KEVIN BARON STARS AND STRIPES • March 10, 2009 ARLINGTON, VA. — Five Chinese vessels, including a Chinese Navy intelligence ship, surrounded and harassed an unarmed U.S. Navy surveillance vessel operating in international waters Sunday in the South China Sea, an act a Defense Department spokesman called "dangerous" and "immature." In what the Pen…	89	-0.2;0.0	M	Obstructed foreign logistical operations (Score 0.491)	Informational: Reports on the global consequences of obstructing foreign logistical operations, including trade disruptions and diplomatic tensions (Score 0.516) Informational: Media coverage of the government’s actions to obstruct foreign logistical operations and their impact (Score 0.515)	Military Sea denial (Score 0.477) Sabotage operations (Score 0.41) Military operations contributing to sanctions (Score 0.403) Economic Aerial and maritime logistics blockade (Score 0.408)	Military Warships (Score 0.528) Navy (Score 0.443) Target maritime spaces (Score 0.421) Informational Intelligence agencies (Score 0.419)	I	D	M	E						#NAME?
05	5	https://www.stripes.com/news/2009-03-10/pentagon-five-chinese-vessels-harass-us-ship-1988887.html	2026-01-18	2009-03	Pentagon: Five Chinese vessels harass U.S. ship By KEVIN BARON STARS AND STRIPES • March 10, 2009 ARLINGTON, VA. — Five Chinese vessels, including a Chinese Navy intelligence ship, surrounded and harassed an unarmed U.S. Navy surveillance vessel operating in international waters Sunday in the South China Sea, an act a Defense Department spokesman called "dangerous" and "immature." In what the Pen…	88	-0.2;0.0	M	Intimidated foreign military presence (Score 0.371)	Military: Deployment of special forces to monitor and, if necessary, sabotage the operations of foreign military units (Score 0.451) Diplomatic: Statements by national leaders condemning or warning against the intimidation tactics of foreign military forces (Score 0.429)	Military Sea denial (Score 0.477) Sabotage operations (Score 0.41) Military operations contributing to sanctions (Score 0.403) Economic (*) Aerial and maritime logistics blockade (Score 0.408)	Military (*) Warships (Score 0.528) Navy (Score 0.443) Target maritime spaces (Score 0.421) Informational Intelligence agencies (Score 0.419)	I	D	M	E	Sample		0.12	-0.74	-0.5	#NAME?	0.1:-0.1	Competition
05	5	https://www.stripes.com/news/2009-03-10/pentagon-five-chinese-vessels-harass-us-ship-1988887.html	2026-01-18	2009-03	Pentagon: Five Chinese vessels harass U.S. ship By KEVIN BARON STARS AND STRIPES • March 10, 2009 ARLINGTON, VA. — Five Chinese vessels, including a Chinese Navy intelligence ship, surrounded and harassed an unarmed U.S. Navy surveillance vessel operating in international waters Sunday in the South China Sea, an act a Defense Department spokesman called "dangerous" and "immature." In what the Pen…	15	-1.0;-0.8	D	Rejected binding international legal ruling (Score 0.366)	Diplomatic: International diplomatic protests or calls for sanctions against the country rejecting the ruling (Score 0.439) Military: Deployment of military intelligence resources to monitor foreign reactions to the rejection of the ruling (Score 0.393)	Military Sea denial (Score 0.477) Sabotage operations (Score 0.41) Military operations contributing to sanctions (Score 0.403) Economic Aerial and maritime logistics blockade (Score 0.408)	Military Warships (Score 0.528) Navy (Score 0.443) Target maritime spaces (Score 0.421) Informational Intelligence agencies (Score 0.419)	I	D	M	E						#NAME?
07	6	https://www.ebsco.com/research-starters/history/usns-impeccable-incident-march-2009	2026-01-18	2009-03	EBSCO Knowledge Advantage TM USNS Impeccable Incident, March 2009 The USNS Impeccable Incident occurred on March 8, 2009, when the U.S. surveillance ship, USNS Impeccable, encountered five Chinese vessels approximately 75 miles off the coast of Hainan Island, China. The United States asserted that the Impeccable was operating in international waters while China claimed that the ship was within a …	58	-0.4;-0.2	M	Militarised disputed territory (Score 0.528)	Military: Strategic use of air, naval, and ground forces to assert territorial claims in disputed territories (Score 0.545) Military: Use of military diplomacy to assert territorial claims and de-escalate tensions in militarised regions (Score 0.545)	Military Sea denial (Score 0.524) Nuclear warships, aircraft, and submarines produced (Score 0.461) Informational Force confrontation (Score 0.52) Sea demarcation (Score 0.486)	Military Navy (Score 0.604) Warships (Score 0.598) Target maritime spaces (Score 0.468) Economic Free trade zones (Score 0.479)	D	M	E	I						#NAME?
07	6	https://www.ebsco.com/research-starters/history/usns-impeccable-incident-march-2009	2026-01-18	2009-03	EBSCO Knowledge Advantage TM USNS Impeccable Incident, March 2009 The USNS Impeccable Incident occurred on March 8, 2009, when the U.S. surveillance ship, USNS Impeccable, encountered five Chinese vessels approximately 75 miles off the coast of Hainan Island, China. The United States asserted that the Impeccable was operating in international waters while China claimed that the ship was within a …	83	-0.2;0.0	I	Information disseminated with a focus on disputed strategic territories (Score 0.512)	Military: Use of military rhetoric in speeches and media to underline unity and resolve regarding disputed strategic territories (Score 0.51) Diplomatic: Creation of narratives highlighting historical ties and sovereign claims over disputed strategic territories (Score 0.499)	Military Sea denial (Score 0.524) Nuclear warships, aircraft, and submarines produced (Score 0.461) Informational (*) Force confrontation (Score 0.52) Sea demarcation (Score 0.486)	Military (*) Navy (Score 0.604) Warships (Score 0.598) Target maritime spaces (Score 0.468) Economic Free trade zones (Score 0.479)	I	D	M	E	Sample		-0.23	-0.75	-0.6	#NAME?	0.1:-0.1	Conflcit
07	6	https://www.ebsco.com/research-starters/history/usns-impeccable-incident-march-2009	2026-01-18	2009-03	EBSCO Knowledge Advantage TM USNS Impeccable Incident, March 2009 The USNS Impeccable Incident occurred on March 8, 2009, when the U.S. surveillance ship, USNS Impeccable, encountered five Chinese vessels approximately 75 miles off the coast of Hainan Island, China. The United States asserted that the Impeccable was operating in international waters while China claimed that the ship was within a …	89	-0.2;0.0	M	Obstructed foreign logistical operations (Score 0.508)	Diplomatic: Increase in international tensions or disputes due to obstructed foreign logistical movements (Score 0.547) Diplomatic: Diplomatic efforts to justify and defend the obstruction of foreign logistical operations (Score 0.532)	Military Sea denial (Score 0.524) Nuclear warships, aircraft, and submarines produced (Score 0.461) Informational Force confrontation (Score 0.52) Sea demarcation (Score 0.486)	Military Navy (Score 0.604) Warships (Score 0.598) Target maritime spaces (Score 0.468) Economic Free trade zones (Score 0.479)	I	D	M	E						#NAME?
06	7	https://www.voanews.com/a/a-13-a-2002-11-02-10-agreement-66270037/539722.html	2026-01-18	2011-01	October 26, 2009 6:36 PM update October 26, 2009 6:36 PM Southeast Asian nations and China have agreed on a declaration to avoid an outbreak of hostilities in the South China Sea, that includes the disputed Spratly Islands. The agreement was reached on the eve of a major regional summit meeting. Senior officials of the Association of Southeast Asian Nations (ASEAN), say they agreed on a code of c…	91	0.6;0.8	D	Agreed diplomatic code of conduct (Score 0.631)	Diplomatic: Creation of diplomatic frameworks to ensure compliance with the formalized code of conduct in bilateral and multilateral contexts (Score 0.571) Military: Coordination between military, intelligence, and diplomatic agencies to enhance the implementation of the formalized code of conduct (Score 0.566)	Military Sea denial (Score 0.578) Diplomatic (*) Non-observance of agreements (Score 0.475) Termination of cooperation agreements (Score 0.464) Informational Sea demarcation (Score 0.476)	Military Target maritime spaces (Score 0.409) Diplomatic (*) International courts (Score 0.459) Agreement (Score 0.459) Diplomatic channels (Score 0.41)	D	I	M	E	Sample		0.74	0.86	1	#NAME?	0.1:-0.1	Competition
06	7	https://www.voanews.com/a/a-13-a-2002-11-02-10-agreement-66270037/539722.html	2026-01-18	2011-01	October 26, 2009 6:36 PM update October 26, 2009 6:36 PM Southeast Asian nations and China have agreed on a declaration to avoid an outbreak of hostilities in the South China Sea, that includes the disputed Spratly Islands. The agreement was reached on the eve of a major regional summit meeting. Senior officials of the Association of Southeast Asian Nations (ASEAN), say they agreed on a code of c…	92	0.8;1.0	D	Peaceful settlement of disputes (Score 0.603)	Diplomatic: International diplomatic initiatives to facilitate the peaceful settlement of disputes (Score 0.596) Diplomatic: National government's commitment to resolving disputes through diplomatic and peaceful means (Score 0.594)	Military Sea denial (Score 0.578) Diplomatic Non-observance of agreements (Score 0.475) Termination of cooperation agreements (Score 0.464) Informational Sea demarcation (Score 0.476)	Military Target maritime spaces (Score 0.409) Diplomatic International courts (Score 0.459) Agreement (Score 0.459) Diplomatic channels (Score 0.41)	D	E	I	M						#NAME?
06	7	https://www.voanews.com/a/a-13-a-2002-11-02-10-agreement-66270037/539722.html	2026-01-18	2011-01	October 26, 2009 6:36 PM update October 26, 2009 6:36 PM Southeast Asian nations and China have agreed on a declaration to avoid an outbreak of hostilities in the South China Sea, that includes the disputed Spratly Islands. The agreement was reached on the eve of a major regional summit meeting. Senior officials of the Association of Southeast Asian Nations (ASEAN), say they agreed on a code of c…	58	-0.4;-0.2	M	Militarised disputed territory (Score 0.55)	Military: Strategic use of air, naval, and ground forces to assert territorial claims in disputed territories (Score 0.583) Diplomatic: International calls for demilitarisation and peacebuilding efforts in disputed territories (Score 0.555)	Military Sea denial (Score 0.578) Diplomatic Non-observance of agreements (Score 0.475) Termination of cooperation agreements (Score 0.464) Informational Sea demarcation (Score 0.476)	Military Target maritime spaces (Score 0.409) Diplomatic International courts (Score 0.459) Agreement (Score 0.459) Diplomatic channels (Score 0.41)	D	M	E	I						#NAME?
09	8	https://www.aljazeera.com/features/2012/5/13/scarborough-shoal-stand-off-sparks-protests	2026-01-18	2012-05	Scarborough Shoal stand-off sparks protests Tensions heighten in the South China Sea, as territory and ‘illegal fishing’ row escalates between Manila and Beijing. philippines By Marga Ortigas Published On 13 May 2012 13 May 2012 Click here to share on social media Manila, The Philippines – For many Filipinos, it’s a no-brainer: Scarborough Shoal, the triangle-shaped 150 square kilometre grouping …	58	-0.4;-0.2	M	Militarised disputed territory (Score 0.499)	Economic: Decline in tourism and business activity in disputed and militarised territories due to security concerns (Score 0.484) Diplomatic: National government's official stance on the militarisation of disputed territories (Score 0.482)	Military Sea denial (Score 0.488) Occupation through ports, bases, and airfields (Score 0.445) Diplomatic Diplomatic support (Score 0.432) Informational Civil-military operations (Score 0.425)	Military Target maritime spaces (Score 0.454) Warships (Score 0.439) Navy (Score 0.424) Economic Fishing vessels (Score 0.558)	D	M	E	I						#NAME?
09	8	https://www.aljazeera.com/features/2012/5/13/scarborough-shoal-stand-off-sparks-protests	2026-01-18	2012-05	Scarborough Shoal stand-off sparks protests Tensions heighten in the South China Sea, as territory and ‘illegal fishing’ row escalates between Manila and Beijing. philippines By Marga Ortigas Published On 13 May 2012 13 May 2012 Click here to share on social media Manila, The Philippines – For many Filipinos, it’s a no-brainer: Scarborough Shoal, the triangle-shaped 150 square kilometre grouping …	59	-0.2;0.0	D	Experienced diplomatic tension (Score 0.472)	Informational: Public government statements explaining the causes and responses to diplomatic tensions (Score 0.446) Informational: Media coverage of diplomatic tensions and their potential impact on international relations (Score 0.441)	Military Sea denial (Score 0.488) Occupation through ports, bases, and airfields (Score 0.445) Diplomatic Diplomatic support (Score 0.432) Informational Civil-military operations (Score 0.425)	Military Target maritime spaces (Score 0.454) Warships (Score 0.439) Navy (Score 0.424) Economic Fishing vessels (Score 0.558)	I	D	M	E						#NAME?
09	8	https://www.aljazeera.com/features/2012/5/13/scarborough-shoal-stand-off-sparks-protests	2026-01-18	2012-05	Scarborough Shoal stand-off sparks protests Tensions heighten in the South China Sea, as territory and ‘illegal fishing’ row escalates between Manila and Beijing. philippines By Marga Ortigas Published On 13 May 2012 13 May 2012 Click here to share on social media Manila, The Philippines – For many Filipinos, it’s a no-brainer: Scarborough Shoal, the triangle-shaped 150 square kilometre grouping …	89	-0.2;0.0	M	Obstructed foreign logistical operations (Score 0.472)	Diplomatic: Impact on national reputation and diplomatic credibility due to the obstruction of foreign logistical flows (Score 0.489) Informational: Reports on the global consequences of obstructing foreign logistical operations, including trade disruptions and diplomatic tensions (Score 0.488)	Military (*) Sea denial (Score 0.488) Occupation through ports, bases, and airfields (Score 0.445) Diplomatic Diplomatic support (Score 0.432) Informational Civil-military operations (Score 0.425)	Military Target maritime spaces (Score 0.454) Warships (Score 0.439) Navy (Score 0.424) Economic (*) Fishing vessels (Score 0.558)	I	D	M	E	Sample		-0.13	-0.76	-0.5	#NAME?	0.1:-0.1	Conflcit
08	9	https://www.the-american-interest.com/2012/12/04/chinese-sabotage-in-the-south-china-sea/	2026-01-18	2012-12	Chinese Sabotage in the South China Sea China hasn’t been doing much to win friends lately. On Tuesday, Vietnam denounced China’s claims to the Spratly and Paracel islands, in reaction to Chinese sabotage of oil explorations by a Vietnamese company. Vietnamese leaders are now up in arms, pledging to protect their economic interests in the South China Sea. Reuters has the story: Vietnam’s condemna…	89	-0.2;0.0	M	Obstructed foreign logistical operations (Score 0.487)	Diplomatic: Diplomatic efforts to justify and defend the obstruction of foreign logistical operations (Score 0.512) Informational: Reports on the global consequences of obstructing foreign logistical operations, including trade disruptions and diplomatic tensions (Score 0.5)	Military (*) Sea denial (Score 0.468) Sabotage operations (Score 0.438) Foreign internal defence operations (Score 0.434) Informational Combined joint exercises (Score 0.455)	Military (*) Host nation security forces (Score 0.417) Target maritime spaces (Score 0.404) Security forces (Score 0.383) Navy (Score 0.371)	I	D	M	E	Sample		-0.24	0.77	-0.65	#NAME?	0.1:-0.1	Conflcit
08	9	https://www.the-american-interest.com/2012/12/04/chinese-sabotage-in-the-south-china-sea/	2026-01-18	2012-12	Chinese Sabotage in the South China Sea China hasn’t been doing much to win friends lately. On Tuesday, Vietnam denounced China’s claims to the Spratly and Paracel islands, in reaction to Chinese sabotage of oil explorations by a Vietnamese company. Vietnamese leaders are now up in arms, pledging to protect their economic interests in the South China Sea. Reuters has the story: Vietnam’s condemna…	65	-0.2;0.0	D	Experienced occasional frictions in international relations (Score 0.458)	Military: Deployment of special forces to secure national interests in areas affected by international frictions (Score 0.492) Military: Engagement in joint military exercises with allied nations to strengthen relations amidst tensions (Score 0.478)	Military Sea denial (Score 0.468) Sabotage operations (Score 0.438) Foreign internal defence operations (Score 0.434) Informational Combined joint exercises (Score 0.455)	Military Host nation security forces (Score 0.417) Target maritime spaces (Score 0.404) Security forces (Score 0.383) Navy (Score 0.371)	D	I	E	M						#NAME?
08	9	https://www.the-american-interest.com/2012/12/04/chinese-sabotage-in-the-south-china-sea/	2026-01-18	2012-12	Chinese Sabotage in the South China Sea China hasn’t been doing much to win friends lately. On Tuesday, Vietnam denounced China’s claims to the Spratly and Paracel islands, in reaction to Chinese sabotage of oil explorations by a Vietnamese company. Vietnamese leaders are now up in arms, pledging to protect their economic interests in the South China Sea. Reuters has the story: Vietnam’s condemna…	57	-0.4;-0.2	M	Occupied strategic territory (Score 0.452)	Military: Use of special forces to secure high-value targets or resources within the occupied territory (Score 0.481) Diplomatic: International diplomatic responses to the occupation of strategic territory (Score 0.471)	Military Sea denial (Score 0.468) Sabotage operations (Score 0.438) Foreign internal defence operations (Score 0.434) Informational Combined joint exercises (Score 0.455)	Military Host nation security forces (Score 0.417) Target maritime spaces (Score 0.404) Security forces (Score 0.383) Navy (Score 0.371)	M	D	I	E						#NAME?
10	10	https://www.telegram.com/story/news/state/2013/12/14/chinese-navy-ship-confronts-u/41546219007/	2026-01-19	2012-12	Chinese navy ship confronts U.S. cruiser amid tensions David Lerman BLOOMBERG NEWS Dec. 13, 2013Updated Dec. 14, 2013, 1:36 p.m. ET A U.S. Navy guided-missile cruiser had a confrontation with a Chinese military ship on Dec. 5 in the South China Sea, underscoring rising tensions in the region over China's newly declared air-defense zone. The USS Cowpens, operating in international waters, and a Ch…	28	-0.6;-0.4	D	Neutralised diplomatic cooperation (Score 0.495)	Diplomatic: Increase in domestic political unrest or protests due to perceived diplomatic failure (Score 0.508) Military: Use of military diplomacy to rebuild or strengthen international relationships post-neutralization (Score 0.466)	Military Crisis response operations (Score 0.513) Counterinsurgency operations (Score 0.511) Assassination operations (Score 0.45) Informational Force confrontation (Score 0.469)	Military Warships (Score 0.49) Navy (Score 0.475) Target maritime spaces (Score 0.474) Security forces (Score 0.41)	D	I	E	M						#NAME?
10	10	https://www.telegram.com/story/news/state/2013/12/14/chinese-navy-ship-confronts-u/41546219007/	2026-01-19	2012-12	Chinese navy ship confronts U.S. cruiser amid tensions David Lerman BLOOMBERG NEWS Dec. 13, 2013Updated Dec. 14, 2013, 1:36 p.m. ET A U.S. Navy guided-missile cruiser had a confrontation with a Chinese military ship on Dec. 5 in the South China Sea, .	58	-0.4;-0.2	M	Militarised disputed territory (Score 0.494)	Military: Strategic use of air, naval, and ground forces to assert territorial claims in disputed territories (Score 0.5) Military: Use of military diplomacy to assert territorial claims and de-escalate tensions in militarised regions (Score 0.465)	Military Crisis response operations (Score 0.513) Counterinsurgency operations (Score 0.511) Assassination operations (Score 0.45) Informational (*) Force confrontation (Score 0.469)	Military (*) Warships (Score 0.49) Navy (Score 0.475) Target maritime spaces (Score 0.474) Security forces (Score 0.41)	D	M	E	I	Sample		-0.25	-0.78	-0.62	#NAME?	0.1:-0.1	Conflcit
10	10	https://www.telegram.com/story/news/state/2013/12/14/chinese-navy-ship-confronts-u/41546219007/	2026-01-19	2012-12	Chinese navy ship confronts U.S. cruiser amid tensions David Lerman BLOOMBERG NEWS Dec. 13, 2013Updated Dec. 14, 2013, 1:36 p.m. ET A U.S. Navy guided-missile cruiser had a confrontation with a Chinese military ship on Dec. 5 in the South China Sea, .	83	-0.2;0.0	I	Information disseminated with a focus on disputed strategic territories (Score 0.477)	Military: Military involvement in securing borders and access points related to disputed strategic territories highlighted through information dissemination (Score 0.418) Diplomatic: Creation of narratives highlighting historical ties and sovereign claims over disputed strategic territories (Score 0.412)	Military Crisis response operations (Score 0.513) Counterinsurgency operations (Score 0.511) Assassination operations (Score 0.45) Informational Force confrontation (Score 0.469)	Military Warships (Score 0.49) Navy (Score 0.475) Target maritime spaces (Score 0.474) Security forces (Score 0.41)	I	D	M	E						#NAME?
16	11	https://gcaptain.com/chinese-fishing-vessels-accidentally-cut-seismic-cables-in-south-china-sea/	2026-01-18	2012-12	Chinese Fishing Vessels “Accidentally” Cut Seismic Streamers in South China Sea Bloomberg Total Views: 123 December 4, 2012 Share this article facebook sharing button twitter sharing button linkedin sharing button sharethis sharing button (Bloomberg).	56	-0.4;-0.2	M	Asserted sovereignty (Score 0.478)	Economic: Impact on international markets, particularly in sectors like trade, shipping, and natural resources, influenced by asserted sovereignty (Score 0.486) Military: Use of military technology to monitor and secure borders, maritime zones, or airspace claimed as sovereign (Score 0.459)	Military Sea denial (Score 0.512) Sea control (Score 0.397) Informational Sea demarcation (Score 0.464) Territorial demarcation (Score 0.419)	Military Target maritime spaces (Score 0.443) Warships (Score 0.393) Economic Energy infrastructure (Score 0.456) Fishing vessels (Score 0.402)	I	D	M	E						#NAME?
16	11	https://gcaptain.com/chinese-fishing-vessels-accidentally-cut-seismic-cables-in-south-china-sea/	2026-01-18	2012-12	Chinese Fishing Vessels “Accidentally” Cut Seismic Streamers in South China Sea Bloomberg Total Views: 123 December 4, 2012 Share this article facebook sharing button twitter sharing button linkedin sharing button sharethis sharing button (Bloomberg).	89	-0.2;0.0	M	Obstructed foreign logistical operations (Score 0.426)	Diplomatic: Diplomatic efforts to justify and defend the obstruction of foreign logistical operations (Score 0.477) Informational: Reports on the global consequences of obstructing foreign logistical operations, including trade disruptions and diplomatic tensions (Score 0.457)	Military (*) Sea denial (Score 0.512) Sea control (Score 0.397) Informational Sea demarcation (Score 0.464) Territorial demarcation (Score 0.419)	Military Target maritime spaces (Score 0.443) Warships (Score 0.393) Economic (*) Energy infrastructure (Score 0.456) Fishing vessels (Score 0.402)	I	D	M	E	Sample		-0.14	-0.79	-0.75	#NAME?	0.1:-0.1	Conflcit
16		https://gcaptain.com/chinese-fishing-vessels-accidentally-cut-seismic-cables-in-south-china-sea/	2026-01-18	2012-12	Chinese Fishing Vessels “Accidentally” Cut Seismic Streamers in South China Sea Bloomberg Total Views: 123 December 4, 2012 Share this article facebook sharing button twitter sharing button linkedin sharing button sharethis sharing button (Bloomberg).	83	-0.2;0.0	I	Information disseminated with a focus on disputed strategic territories (Score 0.42)	Diplomatic: Creation of narratives highlighting historical ties and sovereign claims over disputed strategic territories (Score 0.437) Diplomatic: Emphasis on sovereignty and self-determination regarding disputed strategic territories in official information (Score 0.424)	Military Sea denial (Score 0.512) Sea control (Score 0.397) Informational Sea demarcation (Score 0.464) Territorial demarcation (Score 0.419)	Military Target maritime spaces (Score 0.443) Warships (Score 0.393) Economic Energy infrastructure (Score 0.456) Fishing vessels (Score 0.402)	I	D	M	E						#NAME?
12	12	https://news.usni.org/2014/08/22/chinese-fighter-buzzes-u-s-navy-surveillance-plane-pentagon-upset	2026-01-18	2014-08	Chinese Fighter Buzzes U.S. Navy Surveillance Plane, Pentagon Upset Dave Majumdar August 22, 2014 5:29 PM P-8A Poseidon, operated by Patrol Squadron (VP-16) in February, 2013. US Navy Photo P-8A Poseidon, operated by Patrol Squadron (VP-16) in Februa.	88	-0.2;0.0	M	Intimidated foreign military presence (Score 0.495)	Diplomatic: Changes in bilateral relations with countries hosting foreign military forces perceived as intimidating (Score 0.571) Informational: International media portrayal of the foreign military presence as an act of intimidation or aggression (Score 0.537)	Military Tactical Intelligence gathering operations (Score 0.521) Nuclear warships, aircraft, and submarines produced (Score 0.411) Informational (*) Strategic Intelligence gathering operations (Score 0.516) Force confrontation (Score 0.395)	Military (*) Warships (Score 0.511) Navy (Score 0.473) Aircrafts (Score 0.467) Armament (Score 0.412)	I	D	M	E	Sample		0.14	-0.71	-0.72	#NAME?	0.1:-0.1	Competition
12		https://news.usni.org/2014/08/22/chinese-fighter-buzzes-u-s-navy-surveillance-plane-pentagon-upset	2026-01-18	2014-08	Chinese Fighter Buzzes U.S. Navy Surveillance Plane, Pentagon Upset Dave Majumdar August 22, 2014 5:29 PM P-8A Poseidon, operated by Patrol Squadron (VP-16) in February, 2013. US Navy Photo P-8A Poseidon, operated by Patrol Squadron (VP-16) in Februa.	65	-0.2;0.0	D	Experienced occasional frictions in international relations (Score 0.428)	Military: Use of military intelligence to track and assess the impact of diplomatic tensions on national security (Score 0.498) Military: Increase in military readiness to respond to potential escalation from diplomatic frictions (Score 0.48)	Military Tactical Intelligence gathering operations (Score 0.521) Nuclear warships, aircraft, and submarines produced (Score 0.411) Informational Strategic Intelligence gathering operations (Score 0.516) Force confrontation (Score 0.395)	Military Warships (Score 0.511) Navy (Score 0.473) Aircrafts (Score 0.467) Armament (Score 0.412)	D	I	E	M						#NAME?
12		https://news.usni.org/2014/08/22/chinese-fighter-buzzes-u-s-navy-surveillance-plane-pentagon-upset	2026-01-18	2014-08	Chinese Fighter Buzzes U.S. Navy Surveillance Plane, Pentagon Upset Dave Majumdar August 22, 2014 5:29 PM P-8A Poseidon, operated by Patrol Squadron (VP-16) in February, 2013. US Navy Photo P-8A Poseidon, operated by Patrol Squadron (VP-16) in Februa.	89	-0.2;0.0	M	Obstructed foreign logistical operations (Score 0.405)	Military: Use of military intelligence to track and prevent foreign logistics operations from bypassing national obstructions (Score 0.508) Diplomatic: Increase in international tensions or disputes due to obstructed foreign logistical movements (Score 0.46)	Military Tactical Intelligence gathering operations (Score 0.521) Nuclear warships, aircraft, and submarines produced (Score 0.411) Informational Strategic Intelligence gathering operations (Score 0.516) Force confrontation (Score 0.395)	Military Warships (Score 0.511) Navy (Score 0.473) Aircrafts (Score 0.467) Armament (Score 0.412)	I	D	M	E						#NAME?
11		https://www.theguardian.com/world/2014/may/07/chinese-vietnamese-vessels-clash-south-china-sea	2026-01-18	2015-05	Tensions rise in South China Sea as Vietnamese boats come under attack This article is more than 11 years old Boats damaged and crew members injured during altercation with Chinese vessels in dispute over new oil rig Associated Press Wed 7 May 2014 1.	28	-0.6;-0.4	D	Neutralised diplomatic cooperation (Score 0.477)	Informational: International NGO reports on the implications of neutralized diplomatic commitments on global stability (Score 0.485) Military: Use of military diplomacy to rebuild or strengthen international relationships post-neutralization (Score 0.474)	Military Sea denial (Score 0.45) Sea control (Score 0.397) Diplomatic Diplomatic support (Score 0.519) Denial of the exercise of rights (Score 0.431)	Military Warships (Score 0.392) Target maritime spaces (Score 0.389) Diplomatic Diplomatic channels (Score 0.372) Economic Fishing vessels (Score 0.482)	D	I	E	M						#NAME?
11	13	https://www.theguardian.com/world/2014/may/07/chinese-vietnamese-vessels-clash-south-china-sea	2026-01-18	2015-05	Tensions rise in South China Sea as Vietnamese boats come under attack This article is more than 11 years old Boats damaged and crew members injured during altercation with Chinese vessels in dispute over new oil rig Associated Press Wed 7 May 2014 1.	65	-0.2;0.0	D	Experienced occasional frictions in international relations (Score 0.477)	Diplomatic: Statements from government officials expressing concerns over rising international frictions (Score 0.529) Diplomatic: Increase in diplomatic disagreements between the country and its key international partners (Score 0.527)	Military (*) Sea denial (Score 0.45) Sea control (Score 0.397) Diplomatic Diplomatic support (Score 0.519) Denial of the exercise of rights (Score 0.431)	Military Warships (Score 0.392) Target maritime spaces (Score 0.389) Diplomatic Diplomatic channels (Score 0.372) Economic (*) Fishing vessels (Score 0.482)	D	I	E	M	Sample		-0.15	-0.72	-0.5	#NAME?	0.1:-0.1	Conflcit
11		https://www.theguardian.com/world/2014/may/07/chinese-vietnamese-vessels-clash-south-china-sea	2026-01-18	2015-05	Tensions rise in South China Sea as Vietnamese boats come under attack This article is more than 11 years old Boats damaged and crew members injured during altercation with Chinese vessels in dispute over new oil rig Associated Press Wed 7 May 2014 1.	29	-0.6;-0.4	M	Weakened international alliances (Score 0.474)	Diplomatic: International pressure on the government to restore or strengthen weakened alliances (Score 0.552) Diplomatic: Changes in international diplomatic priorities as a result of weakened alliances (Score 0.495)	Military Sea denial (Score 0.45) Sea control (Score 0.397) Diplomatic Diplomatic support (Score 0.519) Denial of the exercise of rights (Score 0.431)	Military Warships (Score 0.392) Target maritime spaces (Score 0.389) Diplomatic Diplomatic channels (Score 0.372) Economic Fishing vessels (Score 0.482)	D	I	E	M						#NAME?
14		https://thediplomat.com/2015/10/did-china-just-hack-the-international-court-adjudicating-its-south-china-sea-territorial-claims/	2026-01-18	2015-10	Did China Just Hack the International Court Adjudicating Its South China Sea Territorial Claims? Sometimes context and timing can be damning evidence. By Jason Healey and Anni Piiparinen October 27, 2015 Did China Just Hack the International Court Ad.	58	-0.4;-0.2	M	Militarised disputed territory (Score 0.533)	Military: Strategic use of air, naval, and ground forces to assert territorial claims in disputed territories (Score 0.527) Diplomatic: Shifts in regional diplomatic relations as a result of the militarisation of disputed areas (Score 0.496)	Military Cyber attack operations (Score 0.515) Cyber espionage operations (Score 0.476) Sea denial (Score 0.434) Informational Cyber operations against media (Score 0.494)	Military Target cyberspace (Score 0.449) Security forces (Score 0.431) Diplomatic International courts (Score 0.591) Informational Military cybersecurity teams (Score 0.421)	D	M	E	I						#NAME?
14	14	https://thediplomat.com/2015/10/did-china-just-hack-the-international-court-adjudicating-its-south-china-sea-territorial-claims/	2026-01-18	2015-10	Did China Just Hack the International Court Adjudicating Its South China Sea Territorial Claims? Sometimes context and timing can be damning evidence. By Jason Healey and Anni Piiparinen October 27, 2015 Did China Just Hack the International Court Ad.	83	-0.2;0.0	I	Information disseminated with a focus on disputed strategic territories (Score 0.506)	Diplomatic: Emphasis on sovereignty and self-determination regarding disputed strategic territories in official information (Score 0.491) Diplomatic: International diplomatic reactions to state-sponsored information emphasizing disputed strategic territories (Score 0.487)	Military Cyber attack operations (Score 0.515) Cyber espionage operations (Score 0.476) Sea denial (Score 0.434) Informational (*) Cyber operations against media (Score 0.494)	Military Target cyberspace (Score 0.449) Security forces (Score 0.431) Diplomatic (*) International courts (Score 0.591) Informational Military cybersecurity teams (Score 0.421)	I	D	M	E	Sample		-0.46	-0.92	-0.8	#NAME?	0.1:-0.1	Conflcit
14		https://thediplomat.com/2015/10/did-china-just-hack-the-international-court-adjudicating-its-south-china-sea-territorial-claims/	2026-01-18	2015-10	Did China Just Hack the International Court Adjudicating Its South China Sea Territorial Claims? Sometimes context and timing can be damning evidence. By Jason Healey and Anni Piiparinen October 27, 2015 Did China Just Hack the International Court Ad.	15	-1.0;-0.8	D	Rejected binding international legal ruling (Score 0.504)	Diplomatic: Increase in diplomatic tensions with countries or organizations supporting the legal ruling (Score 0.542) Military: Surveillance of international borders to prevent potential escalations due to the legal dispute (Score 0.501)	Military Cyber attack operations (Score 0.515) Cyber espionage operations (Score 0.476) Sea denial (Score 0.434) Informational Cyber operations against media (Score 0.494)	Military Target cyberspace (Score 0.449) Security forces (Score 0.431) Diplomatic International courts (Score 0.591) Informational Military cybersecurity teams (Score 0.421)	I	D	M	E						#NAME?
15		https://jakartaglobe.id/context/china-demands-end-us-surveillance-aircraft-intercept/	2026-01-18	2016-05	China Demands End to US Surveillance After Aircraft Intercept Reuters May 20, 2016 | 4:36 pm SHARE A US Marine Corps helicopter on board the USS Boxer LHD of Goa in a file photo. (Reuters Photo/Prashanth Vishwanathan) A US Marine Corps helicopter on .	65	-0.2;0.0	D	Experienced occasional frictions in international relations (Score 0.514)	Military: Surveillance and monitoring of international borders and maritime areas affected by diplomatic tensions (Score 0.484) Informational: International media reporting on the causes and consequences of the diplomatic tensions (Score 0.465)	Military Sea denial (Score 0.455) Foreign internal defence operations (Score 0.429) Military operations contributing to sanctions (Score 0.427) Economic Trade blockade (Score 0.449)	Military Target airspaces (Score 0.458) Air Force (Score 0.441) Aircrafts (Score 0.441) Economic International trade (Score 0.442)	D	I	E	M						#NAME?
15		https://jakartaglobe.id/context/china-demands-end-us-surveillance-aircraft-intercept/	2026-01-18	2016-05	China Demands End to US Surveillance After Aircraft Intercept Reuters May 20, 2016 | 4:36 pm SHARE A US Marine Corps helicopter on board the USS Boxer LHD of Goa in a file photo. (Reuters Photo/Prashanth Vishwanathan) A US Marine Corps helicopter on .	58	-0.4;-0.2	M	Militarised disputed territory (Score 0.508)	Diplomatic: International diplomatic reactions to the militarisation of disputed areas (Score 0.52) Informational: Public government statements justifying the militarisation of disputed regions for national security (Score 0.485)	Military Sea denial (Score 0.455) Foreign internal defence operations (Score 0.429) Military operations contributing to sanctions (Score 0.427) Economic Trade blockade (Score 0.449)	Military Target airspaces (Score 0.458) Air Force (Score 0.441) Aircrafts (Score 0.441) Economic International trade (Score 0.442)	D	M	E	I						#NAME?
15	15	https://jakartaglobe.id/context/china-demands-end-us-surveillance-aircraft-intercept/	2026-01-18	2016-05	China Demands End to US Surveillance After Aircraft Intercept Reuters May 20, 2016 | 4:36 pm SHARE A US Marine Corps helicopter on board the USS Boxer LHD of Goa in a file photo. (Reuters Photo/Prashanth Vishwanathan) A US Marine Corps helicopter on .	89	-0.2;0.0	M	Obstructed foreign logistical operations (Score 0.487)	Military: Engagement in military operations to ensure national security in response to international logistical disruptions (Score 0.525) Informational: Reports on the global consequences of obstructing foreign logistical operations, including trade disruptions and diplomatic tensions (Score 0.514)	Military Sea denial (Score 0.455) Foreign internal defence operations (Score 0.429) Military operations contributing to sanctions (Score 0.427) Economic (*) Trade blockade (Score 0.449)	Military (*) Target airspaces (Score 0.458) Air Force (Score 0.441) Aircrafts (Score 0.441) Economic International trade (Score 0.442)	I	D	M	E	Sample		-0.16	-0.83	-0.55	#NAME?	0.1:-0.1	Conflcit
18		https://www.reuters.com/article/world/china-scrambles-fighters-as-u-s-sails-warship-near-chinese-claimed-reef-idUSKCN0Y10ES/	2026-01-18	2016-05	China scrambles fighters as U.S. sails warship near Chinese-claimed reef By Michael Martina, Greg Torode and Ben Blanchard May 10, 20161:56 PM GMT-3Updated May 10, 2016 Still image from a United States Navy video purportedly shows Chinese dredging ve.	58	-0.4;-0.2	M	Militarised disputed territory (Score 0.493)	Military: Strategic use of air, naval, and ground forces to assert territorial claims in disputed territories (Score 0.474) Diplomatic: Statements by national leaders justifying or defending the militarisation of disputed regions (Score 0.469)	Military Sea denial (Score 0.504) Nuclear warships, aircraft, and submarines produced (Score 0.404) Diplomatic Denial of the exercise of rights (Score 0.445) Informational Public denial of rights claim (Score 0.413)	Military Warships (Score 0.517) Target maritime spaces (Score 0.463) Navy (Score 0.414) Target land spaces (Score 0.413)	D	M	E	I						#NAME?
18		https://www.reuters.com/article/world/china-scrambles-fighters-as-u-s-sails-warship-near-chinese-claimed-reef-idUSKCN0Y10ES/	2026-01-18	2016-05	China scrambles fighters as U.S. sails warship near Chinese-claimed reef By Michael Martina, Greg Torode and Ben Blanchard May 10, 20161:56 PM GMT-3Updated May 10, 2016 Still image from a United States Navy video purportedly shows Chinese dredging ve.	15	-1.0;-0.8	D	Rejected binding international legal ruling (Score 0.442)	Diplomatic: National government’s official statement rejecting the binding international legal ruling (Score 0.422) Military: Deployment of military forces to safeguard national interests or critical infrastructure affected by international tensions (Score 0.403)	Military Sea denial (Score 0.504) Nuclear warships, aircraft, and submarines produced (Score 0.404) Diplomatic Denial of the exercise of rights (Score 0.445) Informational Public denial of rights claim (Score 0.413)	Military Warships (Score 0.517) Target maritime spaces (Score 0.463) Navy (Score 0.414) Target land spaces (Score 0.413)	I	D	M	E						#NAME?
18	16	https://www.reuters.com/article/world/china-scrambles-fighters-as-u-s-sails-warship-near-chinese-claimed-reef-idUSKCN0Y10ES/	2026-01-18	2016-05	China scrambles fighters as U.S. sails warship near Chinese-claimed reef By Michael Martina, Greg Torode and Ben Blanchard May 10, 20161:56 PM GMT-3Updated May 10, 2016 Still image from a United States Navy video purportedly shows Chinese dredging ve.	89	-0.2;0.0	M	Obstructed foreign logistical operations (Score 0.44)	Diplomatic: Diplomatic efforts to justify and defend the obstruction of foreign logistical operations (Score 0.482) Informational: Reports on the global consequences of obstructing foreign logistical operations, including trade disruptions and diplomatic tensions (Score 0.453)	Military Sea denial (Score 0.504) Nuclear warships, aircraft, and submarines produced (Score 0.404) Diplomatic (*) Denial of the exercise of rights (Score 0.445) Informational Public denial of rights claim (Score 0.413)	Military (*) Warships (Score 0.517) Target maritime spaces (Score 0.463) Navy (Score 0.414) Target land spaces (Score 0.413)	I	D	M	E	Sample		-0.17	-0.64	-0.6	#NAME?	0.1:-0.1	Conflcit
17	17	http://www.xinhuanet.com/english/2016-07/12/c_135507844.htm	2026-01-18	2016-06	BEIJING, July 12 (Xinhua) -- Chinese government on Tuesday refused to recognize the award by an arbitral tribunal on the South China Sea, insisting that bilateral negotiations should settle the dispute. President Xi Jinping said China's territorial s.	15	-1.0;-0.8	D	Rejected binding international legal ruling (Score 0.551)	Diplomatic: National government’s official statement rejecting the binding international legal ruling (Score 0.532) Military: Engagement in military operations to protect national sovereignty in response to international legal conflicts (Score 0.519)	Military Sea denial (Score 0.448) Defensive combat operations (Score 0.419) Diplomatic (*) Non-observance of agreements (Score 0.457) Termination of cooperation agreements (Score 0.421)	Military Host nation security forces (Score 0.436) Diplomatic (*) International courts (Score 0.519) Judiciary (Score 0.395) Diplomatic channels (Score 0.386)	I	D	M	E	Sample		-1.02	0.84	-0.8	#NAME?	0.1:-0.1	Conflcit
17		http://www.xinhuanet.com/english/2016-07/12/c_135507844.htm	2026-01-18	2016-06	BEIJING, July 12 (Xinhua) -- Chinese government on Tuesday refused to recognize the award by an arbitral tribunal on the South China Sea, insisting that bilateral negotiations should settle the dispute. President Xi Jinping said China's territorial s.	83	-0.2;0.0	I	Information disseminated with a focus on disputed strategic territories (Score 0.545)	Diplomatic: Creation of narratives highlighting historical ties and sovereign claims over disputed strategic territories (Score 0.563) Diplomatic: Emphasis on sovereignty and self-determination regarding disputed strategic territories in official information (Score 0.508)	Military Sea denial (Score 0.448) Defensive combat operations (Score 0.419) Diplomatic Non-observance of agreements (Score 0.457) Termination of cooperation agreements (Score 0.421)	Military Host nation security forces (Score 0.436) Diplomatic International courts (Score 0.519) Judiciary (Score 0.395) Diplomatic channels (Score 0.386)	I	D	M	E						#NAME?
17		http://www.xinhuanet.com/english/2016-07/12/c_135507844.htm	2026-01-18	2016-06	BEIJING, July 12 (Xinhua) -- Chinese government on Tuesday refused to recognize the award by an arbitral tribunal on the South China Sea, insisting that bilateral negotiations should settle the dispute. President Xi Jinping said China's territorial s.	58	-0.4;-0.2	M	Militarised disputed territory (Score 0.523)	Military: Conducting joint military exercises with allied forces in militarised disputed regions (Score 0.531) Military: Deployment of military forces to secure and control militarised disputed territories (Score 0.508)	Military Sea denial (Score 0.448) Defensive combat operations (Score 0.419) Diplomatic Non-observance of agreements (Score 0.457) Termination of cooperation agreements (Score 0.421)	Military Host nation security forces (Score 0.436) Diplomatic International courts (Score 0.519) Judiciary (Score 0.395) Diplomatic channels (Score 0.386)	D	M	E	I						#NAME?
13		https://time.com/5412237/china-encounter-decatur-south-china-sea/	2026-01-18	2018-10	A Chinese Warship Nearly Collided With a U.S. Destroyer in an ‘Unsafe’ South China Sea Confrontation 2 minute read PHILIPPINES-US-CHINA-MARITIME-DIPLOMACY A Philippine Navy personnel mans a .50 caliber machine gun during the bilateral maritime exerci.	59	-0.2;0.0	D	Experienced diplomatic tension (Score 0.519)	Informational: Reports on the impact of diplomatic tensions on bilateral or multilateral relations (Score 0.588) Economic: Disruptions in international trade agreements due to diplomatic tension (Score 0.549)	Military Sea denial (Score 0.533) Sea control (Score 0.471) Diplomatic Breakdown of bilateral relations (Score 0.478) Economic Tariff burden (Score 0.478)	Military Target maritime spaces (Score 0.548) Warships (Score 0.485) Navy (Score 0.433) Economic International trade (Score 0.466)	I	D	M	E						#NAME?
13	18	https://time.com/5412237/china-encounter-decatur-south-china-sea/	2026-01-18	2018-10	A Chinese Warship Nearly Collided With a U.S. Destroyer in an ‘Unsafe’ South China Sea Confrontation 2 minute read PHILIPPINES-US-CHINA-MARITIME-DIPLOMACY A Philippine Navy personnel mans a .50 caliber machine gun during the bilateral maritime exerci.	89	-0.2;0.0	M	Obstructed foreign logistical operations (Score 0.509)	Informational: Reports on the global consequences of obstructing foreign logistical operations, including trade disruptions and diplomatic tensions (Score 0.508) Informational: International media portrayal of the consequences of obstructed foreign logistical operations on global trade (Score 0.504)	Military (*) Sea denial (Score 0.533) Sea control (Score 0.471) Diplomatic Breakdown of bilateral relations (Score 0.478) Economic Tariff burden (Score 0.478)	Military Target maritime spaces (Score 0.548) Warships (Score 0.485) Navy (Score 0.433) Economic (*) International trade (Score 0.466)	I	D	M	E	Sample		-0.28	-0.75	-0.58	#NAME?	0.1:-0.1	Conflcit
13		https://time.com/5412237/china-encounter-decatur-south-china-sea/	2026-01-18	2018-10	A Chinese Warship Nearly Collided With a U.S. Destroyer in an ‘Unsafe’ South China Sea Confrontation 2 minute read PHILIPPINES-US-CHINA-MARITIME-DIPLOMACY A Philippine Navy personnel mans a .50 caliber machine gun during the bilateral maritime exerci.	65	-0.2;0.0	D	Experienced occasional frictions in international relations (Score 0.491)	Diplomatic: Disputes over trade agreements or international treaties as a result of frictions (Score 0.559) Economic: Disruption in international trade due to the impact of diplomatic frictions (Score 0.557)	Military Sea denial (Score 0.533) Sea control (Score 0.471) Diplomatic Breakdown of bilateral relations (Score 0.478) Economic Tariff burden (Score 0.478)	Military Target maritime spaces (Score 0.548) Warships (Score 0.485) Navy (Score 0.433) Economic International trade (Score 0.466)	D	I	E	M						#NAME?
19	19	https://amti.csis.org/incident-at-reed-bank-a-crisis-in-the-philippines-china-policy/	2026-01-18	2019-06	Around midnight on June 9, a Chinese fishing vessel rammed and partially sank a wooden Filipino fishing boat, the F/B Gem-Ver 1, which was anchored at Reed Bank in the South China Sea. After the collision, the Chinese vessel reportedly turned off its.	59	-0.2;0.0	D	Experienced diplomatic tension (Score 0.439)	Diplomatic: Increase in diplomatic protests and statements of condemnation from foreign governments (Score 0.48) Diplomatic: International support or opposition towards the country involved in the diplomatic tension (Score 0.441)	Military (*) Sea denial (Score 0.403) Maritime platform construction (Score 0.403) Diplomatic Diplomatic support (Score 0.419) Informational Formal complaint (Score 0.362)	Military Target maritime spaces (Score 0.382) Warships (Score 0.35) Economic (*) Fishing vessels (Score 0.47)	I	D	M	E	Sample		-0.18	-0.56	-0.78	#NAME?	0.1:-0.1	Conflcit
19		https://amti.csis.org/incident-at-reed-bank-a-crisis-in-the-philippines-china-policy/	2026-01-18	2019-06	Around midnight on June 9, a Chinese fishing vessel rammed and partially sank a wooden Filipino fishing boat, the F/B Gem-Ver 1, which was anchored at Reed Bank in the South China Sea. After the collision, the Chinese vessel reportedly turned off its.	28	-0.6;-0.4	D	Neutralised diplomatic cooperation (Score 0.415)	Informational: Disinformation or misinformation regarding the reasons behind the neutralized diplomatic commitments (Score 0.462) Informational: Reporting on the diplomatic alternatives or solutions being pursued after neutralization (Score 0.459)	Military Sea denial (Score 0.403) Maritime platform construction (Score 0.403) Diplomatic Diplomatic support (Score 0.419) Informational Formal complaint (Score 0.362)	Military Target maritime spaces (Score 0.382) Warships (Score 0.35) Economic Fishing vessels (Score 0.47)	D	I	E	M						#NAME?
19		https://amti.csis.org/incident-at-reed-bank-a-crisis-in-the-philippines-china-policy/	2026-01-18	2019-06	Around midnight on June 9, a Chinese fishing vessel rammed and partially sank a wooden Filipino fishing boat, the F/B Gem-Ver 1, which was anchored at Reed Bank in the South China Sea. After the collision, the Chinese vessel reportedly turned off its.	12	-1.0;-0.8	E	Massively destroyed infrastructure or assets (Score 0.404)	Diplomatic: International condemnation or support for the destruction of infrastructure (Score 0.356) Diplomatic: Increase in international diplomatic efforts for recovery and aid (Score 0.336)	Military Sea denial (Score 0.403) Maritime platform construction (Score 0.403) Diplomatic Diplomatic support (Score 0.419) Informational Formal complaint (Score 0.362)	Military Target maritime spaces (Score 0.382) Warships (Score 0.35) Economic Fishing vessels (Score 0.47)	M	D	E	I						#NAME?
20	20	https://thediplomat.com/2020/09/the-code-of-conduct-for-the-south-china-sea-a-long-and-bumpy-road/	2026-01-18	2020-09	The Code of Conduct for the South China Sea: A Long and Bumpy Road For all their recent promises, China and ASEAN claimant states will struggle to bridge fundamentally divergent interests in the South China Sea. By Viet Hoang September 28, 2020 The C.	15	-1.0;-0.8	D	Rejected binding international legal ruling (Score 0.647)	Diplomatic: National government’s official statement rejecting the binding international legal ruling (Score 0.671) Military: Deployment of military forces to safeguard national interests or critical infrastructure affected by international tensions (Score 0.569)	Military Sea denial (Score 0.513) Diplomatic (*) Termination of cooperation agreements (Score 0.517) Non-observance of agreements (Score 0.502) Informational Sea demarcation (Score 0.459)	Military Host nation security forces (Score 0.463) Diplomatic (*) International courts (Score 0.516) Diplomatic channels (Score 0.47) Diplomatic representative (Score 0.43)	I	D	M	E	Sample		-0.49	0.82	0.6	#NAME?	0.1:-0.1	Conflcit
20		https://thediplomat.com/2020/09/the-code-of-conduct-for-the-south-china-sea-a-long-and-bumpy-road/	2026-01-18	2020-09	The Code of Conduct for the South China Sea: A Long and Bumpy Road For all their recent promises, China and ASEAN claimant states will struggle to bridge fundamentally divergent interests in the South China Sea. By Viet Hoang September 28, 2020 The C.	58	-0.4;-0.2	M	Militarised disputed territory (Score 0.562)	Military: Conducting joint military exercises with allied forces in militarised disputed regions (Score 0.569) Military: Strategic use of air, naval, and ground forces to assert territorial claims in disputed territories (Score 0.542)	Military Sea denial (Score 0.513) Diplomatic Termination of cooperation agreements (Score 0.517) Non-observance of agreements (Score 0.502) Informational Sea demarcation (Score 0.459)	Military Host nation security forces (Score 0.463) Diplomatic International courts (Score 0.516) Diplomatic channels (Score 0.47) Diplomatic representative (Score 0.43)	D	M	E	I						#NAME?
20		https://thediplomat.com/2020/09/the-code-of-conduct-for-the-south-china-sea-a-long-and-bumpy-road/	2026-01-18	2020-09	The Code of Conduct for the South China Sea: A Long and Bumpy Road For all their recent promises, China and ASEAN claimant states will struggle to bridge fundamentally divergent interests in the South China Sea. By Viet Hoang September 28, 2020 The C.	83	-0.2;0.0	I	Information disseminated with a focus on disputed strategic territories (Score 0.522)	Diplomatic: Shifts in domestic political discourse toward defending claims over disputed strategic territories in response to information dissemination (Score 0.53) Diplomatic: Creation of narratives highlighting historical ties and sovereign claims over disputed strategic territories (Score 0.511)	Military Sea denial (Score 0.513) Diplomatic Termination of cooperation agreements (Score 0.517) Non-observance of agreements (Score 0.502) Informational Sea demarcation (Score 0.459)	Military Host nation security forces (Score 0.463) Diplomatic International courts (Score 0.516) Diplomatic channels (Score 0.47) Diplomatic representative (Score 0.43)	I	D	M	E						#NAME?
22	21	google.com/url?q=https://graphika.com/reports/operation-naval-gazing&sa=D&source=editors&ust=1768771775312504&usg=AOvVaw2PRvTe7ztCSMheDQybGDTU	2026-01-18	2020-09	Tuesday September 22, 2020 Operation Naval Gazing Ben Nimmo, C. Shawn Eib, Léa Ronzaud Facebook Takes Down Inauthentic Chinese Network On September 22, 2020, Facebook announced that it had taken down a cluster of fake assets on Facebook and Instagram.	78	-0.2;0.0	I	Eroded media influence on social media platforms (e.g., Facebook, X/Twitter, Instagram) (Score 0.523)	Military: Use of military technology to monitor media channels and prevent external influence on domestic media (Score 0.486) Military: Engagement in operations to control or suppress media coverage of national security issues (Score 0.481)	Military (*) Covert operations (Score 0.512) Sabotage operations (Score 0.481) Diplomatic Political campaign (Score 0.471) Informational Strategic Intelligence gathering operations (Score 0.469)	Informational (*) Fake accounts (Score 0.604) Target audience (Score 0.513) Social networks (Score 0.477) National media outlets (Score 0.445)	I	D	E	M	Sample		-0.57	-0.93	-0.4	#NAME?	0.1:-0.1	Conflcit
22		google.com/url?q=https://graphika.com/reports/operation-naval-gazing&sa=D&source=editors&ust=1768771775312504&usg=AOvVaw2PRvTe7ztCSMheDQybGDTU	2026-01-18	2020-09	Tuesday September 22, 2020 Operation Naval Gazing Ben Nimmo, C. Shawn Eib, Léa Ronzaud Facebook Takes Down Inauthentic Chinese Network On September 22, 2020, Facebook announced that it had taken down a cluster of fake assets on Facebook and Instagram.	89	-0.2;0.0	M	Obstructed foreign logistical operations (Score 0.486)	Informational: Dissemination of government messages to explain the rationale behind obstructing foreign logistical operations (Score 0.563) Informational: Media coverage of the government’s actions to obstruct foreign logistical operations and their impact (Score 0.548)	Military Covert operations (Score 0.512) Sabotage operations (Score 0.481) Diplomatic Political campaign (Score 0.471) Informational Strategic Intelligence gathering operations (Score 0.469)	Informational Fake accounts (Score 0.604) Target audience (Score 0.513) Social networks (Score 0.477) National media outlets (Score 0.445)	I	D	M	E						#NAME?
22		google.com/url?q=https://graphika.com/reports/operation-naval-gazing&sa=D&source=editors&ust=1768771775312504&usg=AOvVaw2PRvTe7ztCSMheDQybGDTU	2026-01-18	2020-09	Tuesday September 22, 2020 Operation Naval Gazing Ben Nimmo, C. Shawn Eib, Léa Ronzaud Facebook Takes Down Inauthentic Chinese Network On September 22, 2020, Facebook announced that it had taken down a cluster of fake assets on Facebook and Instagram.	83	-0.2;0.0	I	Information disseminated with a focus on disputed strategic territories (Score 0.453)	Military: Use of military personnel in information campaigns to reinforce legitimacy and sovereignty over disputed strategic territories (Score 0.531) Informational: International reactions to information campaigns focused on disputed strategic territories and their impact on foreign relations (Score 0.528)	Military Covert operations (Score 0.512) Sabotage operations (Score 0.481) Diplomatic Political campaign (Score 0.471) Informational Strategic Intelligence gathering operations (Score 0.469)	Informational Fake accounts (Score 0.604) Target audience (Score 0.513) Social networks (Score 0.477) National media outlets (Score 0.445)	I	D	M	E						#NAME?
23		https://www.aiib.org/en/projects/details/2024/proposed/China-ASEAN-Sea-Rail-Multimodal-Logistics-Project.htm	2026-01-18	2020-09	DESCRIPTION The Project will develop a green, resilient, and smart logistics park and related facilities in Qinzhou Municipality, Guangxi Zhuang Autonomous Region (Guangxi), China. It aims to establish a pivotal logistics hub strategically designed t.	40	-0.6;-0.4	M	Widely neutralised infrastructure or assets (Score 0.392)	Military: Use of military logistics to ensure the smooth transport of essential goods during infrastructure disruptions (Score 0.543) Diplomatic: International diplomatic responses to the neutralisation of infrastructure in the country (Score 0.432)	Diplomatic Non-observance of agreements (Score 0.421) Economic Aerial and maritime logistics blockade (Score 0.45) Trade blockade (Score 0.447) Trade disruption (Score 0.423)	Economic Logistics and supply systems (Score 0.59) Transport infrastructure (Score 0.528) International trade (Score 0.491) Trade routes (Score 0.478)	M	D	E	I						#NAME?
23	22	https://www.aiib.org/en/projects/details/2024/proposed/China-ASEAN-Sea-Rail-Multimodal-Logistics-Project.html	2026-01-18	2020-09	DESCRIPTION The Project will develop a green, resilient, and smart logistics park and related facilities in Qinzhou Municipality, Guangxi Zhuang Autonomous Region (Guangxi), China. It aims to establish a pivotal logistics hub strategically designed t.	26	-0.8;-0.6	E	Destroyed infrastructure or assets (Score 0.384)	Military: Use of military logistics to transport and deliver materials for infrastructure rebuilding (Score 0.511) Diplomatic: Creation of post-destruction rebuilding frameworks or agreements (Score 0.444)	Diplomatic Non-observance of agreements (Score 0.421) Economic (*) Aerial and maritime logistics blockade (Score 0.45) Trade blockade (Score 0.447) Trade disruption (Score 0.423)	Economic (*) Logistics and supply systems (Score 0.59) Transport infrastructure (Score 0.528) International trade (Score 0.491) Trade routes (Score 0.478)	M	D	E	I	Sample		0.27	0.84	0.6	#NAME?	0.1:-0.1	Competition
21		https://www.bbc.com/news/business-54899254	2026-01-18	2020-11	What is the Regional Comprehensive Economic Partnership (RCEP)? 15 November 2020 Tim McDonald BBC News, Singapore Share Save Getty Images Dock worker in front of shipGetty Images Asian leaders have signed a mammoth trade deal that has been nearly a d.	28	-0.6;-0.4	D	Neutralised diplomatic cooperation (Score 0.51)	Economic: Impact on local businesses due to disrupted international partnerships and trade agreements (Score 0.539) Economic: Impact on international trade due to the loss of diplomatic agreements or commitments (Score 0.526)	Diplomatic Non-observance of agreements (Score 0.488) Economic Regional economic integration (Score 0.565) Tariff burden (Score 0.484) Trade blockade (Score 0.464)	Military Target maritime spaces (Score 0.445) Economic Free trade zones (Score 0.638) International trade (Score 0.559) Foreign trade system (Score 0.52)	D	I	E	M						#NAME?
21	23	https://www.bbc.com/news/business-54899254	2026-01-18	2020-11	What is the Regional Comprehensive Economic Partnership (RCEP)? 15 November 2020 Tim McDonald BBC News, Singapore Share Save Getty Images Dock worker in front of shipGetty Images Asian leaders have signed a mammoth trade deal that has been nearly a d.	90	0.0;0.2	E	Strengthened regional economic connectivity (Score 0.493)	Economic: Increase in cross-border trade volume as a result of enhanced regional economic connectivity (Score 0.57) Informational: Dissemination of information on new trade agreements or partnerships that enhance regional economic ties (Score 0.563)	Diplomatic Non-observance of agreements (Score 0.488) Economic (*) Regional economic integration (Score 0.565) Tariff burden (Score 0.484) Trade blockade (Score 0.464)	Military Target maritime spaces (Score 0.445) Economic (*) Free trade zones (Score 0.638) International trade (Score 0.559) Foreign trade system (Score 0.52)	E	D	I	M	Sample		0.28	0.95	0.7	#NAME?	0.1:-0.1	Competition
21		https://www.bbc.com/news/business-54899254	2026-01-18	2020-11	What is the Regional Comprehensive Economic Partnership (RCEP)? 15 November 2020 Tim McDonald BBC News, Singapore Share Save Getty Images Dock worker in front of shipGetty Images Asian leaders have signed a mammoth trade deal that has been nearly a d.	29	-0.6;-0.4	D	Weakened international alliances (Score 0.482)	Economic: Increase in tariffs or trade barriers as a result of weakened international relations (Score 0.535) Economic: Impact on trade agreements and economic cooperation due to weakened alliances (Score 0.495)	Diplomatic Non-observance of agreements (Score 0.488) Economic Regional economic integration (Score 0.565) Tariff burden (Score 0.484) Trade blockade (Score 0.464)	Military Target maritime spaces (Score 0.445) Economic Free trade zones (Score 0.638) International trade (Score 0.559) Foreign trade system (Score 0.52)	D	I	E	M						#NAME?
26		https://www.rand.org/pubs/commentary/2021/11/dutertes-dalliance-with-china-is-over.html	2026-01-18	2021-11	Duterte's Dalliance with China Is Over Commentary Nov 2, 2021 Philippine President Rodrigo Duterte delivers his 6th State of the Nation address at the House of Representative in Manila, Philippines, July 26, 2021, photo by Lisa Marie David/Reuters Ph.	88	-0.2;0.0	M	Intimidated foreign military presence (Score 0.496)	Military: Expansion of military infrastructure to counter foreign military operations perceived as threatening (Score 0.544) Diplomatic: International diplomatic reactions to the intimidation caused by foreign military presence in the region (Score 0.476)	Military Essential infrastructure destruction operations (Score 0.503) Foreign internal defence operations (Score 0.469) Diplomatic Termination of cooperation agreements (Score 0.463) Economic Expansion of critical infrastructure (Score 0.561)	Military Critical infrastructure (Score 0.564) Diplomatic Diplomatic representative (Score 0.492) Economic Technological infrastructure (Score 0.521) Industrial infrastructure (Score 0.494)	I	D	M	E						#NAME?
26		https://www.rand.org/pubs/commentary/2021/11/dutertes-dalliance-with-china-is-over.html	2026-01-18	2021-11	Duterte's Dalliance with China Is Over Commentary Nov 2, 2021 Philippine President Rodrigo Duterte delivers his 6th State of the Nation address at the House of Representative in Manila, Philippines, July 26, 2021, photo by Lisa Marie David/Reuters Ph.	28	-0.6;-0.4	D	Neutralised diplomatic cooperation (Score 0.482)	Diplomatic: Shifts in national foreign policy due to neutralized diplomatic commitments (Score 0.523) Diplomatic: Creation of new diplomatic frameworks or alliances to replace neutralized commitments (Score 0.505)	Military Essential infrastructure destruction operations (Score 0.503) Foreign internal defence operations (Score 0.469) Diplomatic Termination of cooperation agreements (Score 0.463) Economic Expansion of critical infrastructure (Score 0.561)	Military Critical infrastructure (Score 0.564) Diplomatic Diplomatic representative (Score 0.492) Economic Technological infrastructure (Score 0.521) Industrial infrastructure (Score 0.494)	D	I	E	M						#NAME?
26	24	https://www.rand.org/pubs/commentary/2021/11/dutertes-dalliance-with-china-is-over.html	2026-01-18	2021-11	Duterte's Dalliance with China Is Over Commentary Nov 2, 2021 Philippine President Rodrigo Duterte delivers his 6th State of the Nation address at the House of Representative in Manila, Philippines, July 26, 2021, photo by Lisa Marie David/Reuters Ph.	65	-0.2;0.0	D	Experienced occasional frictions in international relations (Score 0.473)	Military: Engagement in joint military exercises with allied nations to strengthen relations amidst tensions (Score 0.544) Diplomatic: Shifts in diplomatic relations with specific countries involved in the frictions (Score 0.514)	Military Essential infrastructure destruction operations (Score 0.503) Foreign internal defence operations (Score 0.469) Diplomatic (*) Termination of cooperation agreements (Score 0.463) Economic Expansion of critical infrastructure (Score 0.561)	Military Critical infrastructure (Score 0.564) Diplomatic (*) Diplomatic representative (Score 0.492) Economic Technological infrastructure (Score 0.521) Industrial infrastructure (Score 0.494)	D	I	E	M	Sample		0.16	0.85	0.5	#NAME?	0.1:-0.1	Competition
28		https://www.theguardian.com/world/2022/mar/21/china-has-fully-militarized-three-islands-in-south-china-sea-us-admiral-says	2026-01-18	2022-03	This article is more than 3 years old China has fully militarized three islands in South China Sea, US admiral says This article is more than 3 years old John C Aquilino says Beijing is flexing its military muscle by arming isles with fighter jets, a.	92	0.8;1.0	D	Peaceful settlement of disputes (Score 0.6)	Military: Reduction in border security tensions and military engagements in regions where disputes have been resolved peacefully (Score 0.602) Diplomatic: Formation of international mediation or arbitration efforts to facilitate peaceful settlements (Score 0.598)	Military Sea denial (Score 0.43) Military operations contributing to sanctions (Score 0.423) Diplomatic Denial of the exercise of rights (Score 0.45) Economic Aerial and maritime logistics blockade (Score 0.422)	Military Navy (Score 0.48) Warships (Score 0.441) Host nation security forces (Score 0.432) Economic International trade (Score 0.468)	D	E	I	M						#NAME?
28	25	https://www.theguardian.com/world/2022/mar/21/china-has-fully-militarized-three-islands-in-south-china-sea-us-admiral-says	2026-01-18	2022-03	This article is more than 3 years old China has fully militarized three islands in South China Sea, US admiral says This article is more than 3 years old John C Aquilino says Beijing is flexing its military muscle by arming isles with fighter jets, a.	56	-0.4;-0.2	M	Asserted sovereignty (Score 0.503)	Informational: Reports on the international legal and political implications of asserting sovereignty over disputed territories (Score 0.567) Military: Use of military technology to monitor and secure borders, maritime zones, or airspace claimed as sovereign (Score 0.551)	Military (*) Sea denial (Score 0.43) Military operations contributing to sanctions (Score 0.423) Diplomatic Denial of the exercise of rights (Score 0.45) Economic Aerial and maritime logistics blockade (Score 0.422)	Military Navy (Score 0.48) Warships (Score 0.441) Host nation security forces (Score 0.432) Economic (*) International trade (Score 0.468)	I	D	M	E	Sample		-0.87	-0.96	-0.8	#NAME?	0.1:-0.1	Conflcit
34		https://www.npr.org/2023/02/13/1156475789/the-philippines-accuses-a-chinese-ship-of-aiming-a-laser-at-a-filipino-boat-crew	2026-01-18	2023-02	The Philippines accuses a Chinese ship of aiming a laser at a Filipino boat crew February 13, 20233:33 AM ET By The Associated Press This photo provided by the Philippine Coast Guard shows a Chinese coast guard ship in the disputed South China Sea, F.	58	-0.4;-0.2	M	Militarised disputed territory (Score 0.53)	Military: Conducting joint military exercises with allied forces in militarised disputed regions (Score 0.637) Economic: Financial impact on trade routes that pass through militarised disputed territories (Score 0.528)	Military Sea denial (Score 0.602) Economic Aerial and maritime logistics blockade (Score 0.465) Informational Combined joint exercises (Score 0.546) Sea demarcation (Score 0.414)	Military Navy (Score 0.463) Target maritime spaces (Score 0.446) Warships (Score 0.422) Economic International trade (Score 0.414)	D	M	E	I						#NAME?
34	26	https://www.npr.org/2023/02/13/1156475789/the-philippines-accuses-a-chinese-ship-of-aiming-a-laser-at-a-filipino-boat-crew	2026-01-18	2023-02	The Philippines accuses a Chinese ship of aiming a laser at a Filipino boat crew February 13, 20233:33 AM ET By The Associated Press This photo provided by the Philippine Coast Guard shows a Chinese coast guard ship in the disputed South China Sea, F.	89	-0.2;0.0	M	Obstructed foreign logistical operations (Score 0.483)	Diplomatic: Diplomatic efforts to justify and defend the obstruction of foreign logistical operations (Score 0.499) Diplomatic: Increase in international tensions or disputes due to obstructed foreign logistical movements (Score 0.488)	Military Sea denial (Score 0.602) Economic (*) Aerial and maritime logistics blockade (Score 0.465) Informational Combined joint exercises (Score 0.546) Sea demarcation (Score 0.414)	Military (*) Navy (Score 0.463) Target maritime spaces (Score 0.446) Warships (Score 0.422) Economic International trade (Score 0.414)	I	D	M	E	Sample		-0.19	-0.66	-0.68	#NAME?	0.1:-0.1	Conflcit
34		https://www.npr.org/2023/02/13/1156475789/the-philippines-accuses-a-chinese-ship-of-aiming-a-laser-at-a-filipino-boat-crew	2026-01-18	2023-02	The Philippines accuses a Chinese ship of aiming a laser at a Filipino boat crew February 13, 20233:33 AM ET By The Associated Press This photo provided by the Philippine Coast Guard shows a Chinese coast guard ship in the disputed South China Sea, F.	83	-0.2;0.0	I	Information disseminated with a focus on disputed strategic territories (Score 0.479)	Diplomatic: Shifts in domestic political discourse toward defending claims over disputed strategic territories in response to information dissemination (Score 0.487) Diplomatic: International diplomatic reactions to state-sponsored information emphasizing disputed strategic territories (Score 0.472)	Military Sea denial (Score 0.602) Economic Aerial and maritime logistics blockade (Score 0.465) Informational Combined joint exercises (Score 0.546) Sea demarcation (Score 0.414)	Military Navy (Score 0.463) Target maritime spaces (Score 0.446) Warships (Score 0.422) Economic International trade (Score 0.414)	I	D	M	E						#NAME?
38	27	https://asianews.network/biden-marcos-significantly-strengthened-us-philippines-alliance-blinken/	2026-01-18	2023-05	Biden, Marcos ‘significantly’ strengthened US-Philippines alliance: Blinken US Secretary of State Antony Blinken also pointed out how the Philippines and the US launched new initiatives together to create economic opportunities for Americans and Fili.	65	-0.2;0.0	D	Experienced occasional frictions in international relations (Score 0.403)	Economic: Impact on national exports and imports due to diplomatic disputes with trading partners (Score 0.456) Diplomatic: Increase in diplomatic disagreements between the country and its key international partners (Score 0.441)	Diplomatic (*) Diplomatic support (Score 0.45) Economic Trade blockade (Score 0.408) Trade disruption (Score 0.366) Foreign investment restrictions (Score 0.366)	Economic (*) International trade (Score 0.468) Foreign trade system (Score 0.452) Key economic actors (Score 0.438) Foreign exchange markets (Score 0.382)	D	I	E	M	Sample		-0.48	-0.77	0.6	#NAME?	0.1:-0.1	Conflcit
38		https://asianews.network/biden-marcos-significantly-strengthened-us-philippines-alliance-blinken/	2026-01-18	2023-05	Biden, Marcos ‘significantly’ strengthened US-Philippines alliance: Blinken US Secretary of State Antony Blinken also pointed out how the Philippines and the US launched new initiatives together to create economic opportunities for Americans and Fili.	29	-0.6;-0.4	D	Weakened international alliances (Score 0.399)	Economic: Increase in costs for businesses that were dependent on strong international alliances (Score 0.503) Informational: Reporting on the economic and social impacts of weakened alliances on the country (Score 0.488)	Diplomatic Diplomatic support (Score 0.45) Economic Trade blockade (Score 0.408) Trade disruption (Score 0.366) Foreign investment restrictions (Score 0.366)	Economic International trade (Score 0.468) Foreign trade system (Score 0.452) Key economic actors (Score 0.438) Foreign exchange markets (Score 0.382)	D	I	E	M						#NAME?
38		https://asianews.network/biden-marcos-significantly-strengthened-us-philippines-alliance-blinken/	2026-01-18	2023-05	Biden, Marcos ‘significantly’ strengthened US-Philippines alliance: Blinken US Secretary of State Antony Blinken also pointed out how the Philippines and the US launched new initiatives together to create economic opportunities for Americans and Fili.	59	-0.2;0.0	D	Experienced diplomatic tension (Score 0.385)	Economic: Increased costs in securing international contracts or partnerships amidst diplomatic tensions (Score 0.487) Economic: Impact on global market stability as a result of diplomatic tensions between nations (Score 0.437)	Diplomatic Diplomatic support (Score 0.45) Economic Trade blockade (Score 0.408) Trade disruption (Score 0.366) Foreign investment restrictions (Score 0.366)	Economic International trade (Score 0.468) Foreign trade system (Score 0.452) Key economic actors (Score 0.438) Foreign exchange markets (Score 0.382)	I	D	M	E						#NAME?
25		https://www.trtworld.com/article/13513328	2026-01-18	2023-06	By Ted Regencia June 8, 2023 It has been a fiery start for June in the Asia-Pacific, as two of its most powerful geopolitical players, the United States and China, face off on several fronts, threatening to drag the entire region into unwanted confro.	59	-0.2;0.0	D	Experienced diplomatic tension (Score 0.455)	Military: Deployment of military forces to safeguard national interests in regions affected by tensions (Score 0.477) Military: Increase in military readiness or posturing in response to heightened diplomatic tensions (Score 0.452)	Military Crisis response operations (Score 0.48) Sea denial (Score 0.478) Sea control (Score 0.435) Informational Force confrontation (Score 0.442)	Military Target maritime spaces (Score 0.447) Warships (Score 0.434) Host nation security forces (Score 0.369) Diplomatic Speech (Score 0.449)	I	D	M	E						#NAME?
25	28	https://www.trtworld.com/article/13513328	2026-01-18	2023-06	By Ted Regencia June 8, 2023 It has been a fiery start for June in the Asia-Pacific, as two of its most powerful geopolitical players, the United States and China, face off on several fronts, threatening to drag the entire region into unwanted confro.	58	-0.4;-0.2	M	Militarised disputed territory (Score 0.45)	Diplomatic: Statements by national leaders justifying or defending the militarisation of disputed regions (Score 0.509) Military: Conducting joint military exercises with allied forces in militarised disputed regions (Score 0.491)	Military Crisis response operations (Score 0.48) Sea denial (Score 0.478) Sea control (Score 0.435) Informational (*) Force confrontation (Score 0.442)	Military (*) Target maritime spaces (Score 0.447) Warships (Score 0.434) Host nation security forces (Score 0.369) Diplomatic Speech (Score 0.449)	D	M	E	I	Sample		0.17	-0.68	-0.4	#NAME?	0.1:-0.1	Competition
25		https://www.trtworld.com/article/13513328	2026-01-18	2023-06	By Ted Regencia June 8, 2023 It has been a fiery start for June in the Asia-Pacific, as two of its most powerful geopolitical players, the United States and China, face off on several fronts, threatening to drag the entire region into unwanted confro.	83	-0.2;0.0	I	Information disseminated with a focus on disputed strategic territories (Score 0.44)	Diplomatic: International diplomatic reactions to state-sponsored information emphasizing disputed strategic territories (Score 0.428) Military: Use of military symbols and language in state-run media to reinforce claims over disputed strategic territories (Score 0.415)	Military Crisis response operations (Score 0.48) Sea denial (Score 0.478) Sea control (Score 0.435) Informational Force confrontation (Score 0.442)	Military Target maritime spaces (Score 0.447) Warships (Score 0.434) Host nation security forces (Score 0.369) Diplomatic Speech (Score 0.449)	I	D	M	E						#NAME?
30	29	https://asean.org/wp-content/uploads/2023/09/Final-ASEAN-China-Joint-Statement-on-Mutually-Beneficial-Cooperation-on-the-ASEAN-Outlook-on-the-Indo-Pacific.pdf	2026-01-18	2023-09	ASEAN-China Joint Statement on Mutually Beneficial Cooperation on the ASEAN Outlook on the Indo-Pacific We, the Member States of the Association of Southeast Asian Nations (ASEAN) and the People’s Republic of China, gathered at the 26th ASEAN-China S.	90	0.0;0.2	E	Strengthened regional economic connectivity (Score 0.497)	Diplomatic: International diplomatic agreements aimed at enhancing regional economic connectivity (Score 0.558) Diplomatic: Formation of economic partnerships or alliances to strengthen regional economic connectivity (Score 0.549)	Military Maritime platform construction (Score 0.427) Sea control (Score 0.424) Diplomatic (*) International integration (Score 0.496) Economic Regional economic integration (Score 0.477)	Military Target maritime spaces (Score 0.459) Warships (Score 0.398) Economic (*) International financial institutions (Score 0.483) Investment funds (Score 0.413)	E	D	I	M	Sample		0.29	-0.88	0.7	#NAME?	0.1:-0.1	Competition
30		https://asean.org/wp-content/uploads/2023/09/Final-ASEAN-China-Joint-Statement-on-Mutually-Beneficial-Cooperation-on-the-ASEAN-Outlook-on-the-Indo-Pacific.pdf	2026-01-18	2023-09	ASEAN-China Joint Statement on Mutually Beneficial Cooperation on the ASEAN Outlook on the Indo-Pacific We, the Member States of the Association of Southeast Asian Nations (ASEAN) and the People’s Republic of China, gathered at the 26th ASEAN-China S.	29	-0.6;-0.4	D	Weakened international alliances (Score 0.436)	Diplomatic: National government statements on the efforts to address weakened alliances and restore relations (Score 0.508) Economic: Impact on trade agreements and economic cooperation due to weakened alliances (Score 0.486)	Military Maritime platform construction (Score 0.427) Sea control (Score 0.424) Diplomatic International integration (Score 0.496) Economic Regional economic integration (Score 0.477)	Military Target maritime spaces (Score 0.459) Warships (Score 0.398) Economic International financial institutions (Score 0.483) Investment funds (Score 0.413)	D	I	E	M						#NAME?
30		https://asean.org/wp-content/uploads/2023/09/Final-ASEAN-China-Joint-Statement-on-Mutually-Beneficial-Cooperation-on-the-ASEAN-Outlook-on-the-Indo-Pacific.pdf	2026-01-18	2023-09	ASEAN-China Joint Statement on Mutually Beneficial Cooperation on the ASEAN Outlook on the Indo-Pacific We, the Member States of the Association of Southeast Asian Nations (ASEAN) and the People’s Republic of China, gathered at the 26th ASEAN-China S.	21	-0.8;-0.6	E	Suffered severe resource crisis with international mitigation (Score 0.39)	Diplomatic: Creation of international aid agreements to address the resource crisis (Score 0.528) Military: Coordination between military and international organizations to distribute aid (Score 0.463)	Military Maritime platform construction (Score 0.427) Sea control (Score 0.424) Diplomatic International integration (Score 0.496) Economic Regional economic integration (Score 0.477)	Military Target maritime spaces (Score 0.459) Warships (Score 0.398) Economic International financial institutions (Score 0.483) Investment funds (Score 0.413)	D	I	E	M						#NAME?
35		https://www.thetrumpet.com/28161-china-releases-new-map-claiming-neighbors-territory?gad_source=1&gad_campaignid=23255341856&gbraid=0AAAABA59_gohLOlAfQXfvpgdJFd5HGppo&gclid=CjwKCAiA4KfLBhB0EiwAUY7GAUUDUsyqguC4BMtSbrDT8Yoq1qWTSxnFS2-8FiM7NC8vWrGguQce6BoC4gwQAvD_BwE	2026-01-18	2023-09	China Releases New Map, Claiming Neighbors’ Territory By Peter van Halteren • September 7, 2023 China released a new edition of its “standard map” on August 28, which infuriated a number of its neighbors by claiming parts of their territory. South Ch.	83	-0.2;0.0	I	Information disseminated with a focus on disputed strategic territories (Score 0.466)	Diplomatic: Emphasis on sovereignty and self-determination regarding disputed strategic territories in official information (Score 0.494) Diplomatic: Use of national symbols, monuments, and landmarks linked to disputed strategic territories to reinforce sovereignty claims (Score 0.468)	Military Sea denial (Score 0.5) Sea control (Score 0.456) Economic Trade blockade (Score 0.415) Informational Sea demarcation (Score 0.464)	Military Target maritime spaces (Score 0.403) Warships (Score 0.374) Economic International trade (Score 0.414)	I	D	M	E						#NAME?
35		https://www.thetrumpet.com/28161-china-releases-new-map-claiming-neighbors-territory?gad_source=1&gad_campaignid=23255341856&gbraid=0AAAABA59_gohLOlAfQXfvpgdJFd5HGppo&gclid=CjwKCAiA4KfLBhB0EiwAUY7GAUUDUsyqguC4BMtSbrDT8Yoq1qWTSxnFS2-8FiM7NC8vWrGguQce6BoC4gwQAvD_BwE	2026-01-18	2023-09	China Releases New Map, Claiming Neighbors’ Territory By Peter van Halteren • September 7, 2023 China released a new edition of its “standard map” on August 28, which infuriated a number of its neighbors by claiming parts of their territory. South Ch.	58	-0.4;-0.2	M	Militarised disputed territory (Score 0.463)	Diplomatic: National government's official stance on the militarisation of disputed territories (Score 0.43) Informational: Public government statements justifying the militarisation of disputed regions for national security (Score 0.428)	Military Sea denial (Score 0.5) Sea control (Score 0.456) Economic Trade blockade (Score 0.415) Informational Sea demarcation (Score 0.464)	Military Target maritime spaces (Score 0.403) Warships (Score 0.374) Economic International trade (Score 0.414)	D	M	E	I						#NAME?
35	30	https://www.thetrumpet.com/28161-china-releases-new-map-claiming-neighbors-territory?gad_source=1&gad_campaignid=23255341856&gbraid=0AAAABA59_gohLOlAfQXfvpgdJFd5HGppo&gclid=CjwKCAiA4KfLBhB0EiwAUY7GAUUDUsyqguC4BMtSbrDT8Yoq1qWTSxnFS2-8FiM7NC8vWrGguQce6BoC4gwQAvD_BwE	2026-01-18	2023-09	China Releases New Map, Claiming Neighbors’ Territory By Peter van Halteren • September 7, 2023 China released a new edition of its “standard map” on August 28, which infuriated a number of its neighbors by claiming parts of their territory. South Ch.	65	-0.2;0.0	D	Experienced occasional frictions in international relations (Score 0.458)	Military: Use of military diplomacy to manage and diffuse international frictions through peaceful means (Score 0.441) Diplomatic: Increase in diplomatic disagreements between the country and its key international partners (Score 0.44)	Military Sea denial (Score 0.5) Sea control (Score 0.456) Economic Trade blockade (Score 0.415) Informational (*) Sea demarcation (Score 0.464)	Military (*) Target maritime spaces (Score 0.403) Warships (Score 0.374) Economic International trade (Score 0.414)	D	I	E	M	Sample		-0.26	-0.89	-0.7	#NAME?	0.1:-0.1	Conflcit
31		https://www.chinadaily.com.cn/a/202312/02/WS656a69c5a31090682a5f10bb.html	2026-01-18	2023-10	Xi highlights key role of coast guard By XU WEI | CHINA DAILY | Updated: 2023-12-02 07:18 President Xi Jinping, also general secretary of the Communist Party of China Central Committee and chairman of the Central Military Commission, delivers an impo.	89	-0.2;0.0	M	Obstructed foreign logistical operations (Score 0.475)	Diplomatic: Engagement in international legal or diplomatic forums to resolve the issues related to obstructed logistical operations (Score 0.503) Military: Coordination between military and law enforcement agencies to monitor and control the impact of disrupted foreign logistics (Score 0.492)	Military Guerrilla support operations (Score 0.419) Sea control (Score 0.416) Diplomatic International integration (Score 0.425) Informational Civil-military operations (Score 0.465)	Military Target maritime spaces (Score 0.456) Host nation security forces (Score 0.443) Warships (Score 0.421) Diplomatic Diplomatic representative (Score 0.473)	I	D	M	E						#NAME?
31	31	https://www.chinadaily.com.cn/a/202312/02/WS656a69c5a31090682a5f10bb.html	2026-01-18	2023-10	Xi highlights key role of coast guard By XU WEI | CHINA DAILY | Updated: 2023-12-02 07:18 President Xi Jinping, also general secretary of the Communist Party of China Central Committee and chairman of the Central Military Commission, delivers an impo.	85	-0.2;0.0	D	Undermined multilateral codes of conduct and legal frameworks (Score 0.418)	Military: Coordination between military, intelligence, and diplomatic agencies to manage the consequences of undermining multilateral legal structures (Score 0.486) Military: Use of military assets to safeguard national interests and secure borders following the erosion of international agreements (Score 0.486)	Military Guerrilla support operations (Score 0.419) Sea control (Score 0.416) Diplomatic (*) International integration (Score 0.425) Informational Civil-military operations (Score 0.465)	Military (*) Target maritime spaces (Score 0.456) Host nation security forces (Score 0.443) Warships (Score 0.421) Diplomatic Diplomatic representative (Score 0.473)	D	I	E	M	Sample		-0.34	-0.69	-0.3	#NAME?	0.1:-0.1	Conflcit
32		https://www.bbc.com/news/world-asia-67015857	2026-01-18	2023-10	BBC witnesses Chinese ships blocking Philippines supply boats 6 October 2023 Virma Simonette & Joel Guinto in South China Sea and Singapore Share Save Watch: Formation of Chinese ships blocks Philippine boats The BBC has witnessed Chinese vessels blo.	15	-1.0;-0.8	D	Rejected binding international legal ruling (Score 0.523)	Military: Deployment of military forces to safeguard national interests or critical infrastructure affected by international tensions (Score 0.467) Diplomatic: National government’s official statement rejecting the binding international legal ruling (Score 0.459)	Military Sea denial (Score 0.499) Blockade operations (Score 0.476) Economic Aerial and maritime logistics blockade (Score 0.529) Trade blockade (Score 0.505)	Military Target maritime spaces (Score 0.449) Warships (Score 0.446) Diplomatic International courts (Score 0.507) Economic Fishing vessels (Score 0.442)	I	D	M	E						#NAME?
32	32	https://www.bbc.com/news/world-asia-67015857	2026-01-18	2023-10	BBC witnesses Chinese ships blocking Philippines supply boats 6 October 2023 Virma Simonette & Joel Guinto in South China Sea and Singapore Share Save Watch: Formation of Chinese ships blocks Philippine boats The BBC has witnessed Chinese vessels blo.	89	-0.2;0.0	M	Obstructed foreign logistical operations (Score 0.481)	Diplomatic: Increase in international tensions or disputes due to obstructed foreign logistical movements (Score 0.468) Diplomatic: Diplomatic efforts to justify and defend the obstruction of foreign logistical operations (Score 0.466)	Military (*) Sea denial (Score 0.499) Blockade operations (Score 0.476) Economic Aerial and maritime logistics blockade (Score 0.529) Trade blockade (Score 0.505)	Military Target maritime spaces (Score 0.449) Warships (Score 0.446) Diplomatic International courts (Score 0.507) Economic (*) Fishing vessels (Score 0.442)	I	D	M	E	Sample		0.18	-0.78	-0.78	#NAME?	0.1:-0.1	Competition
32		https://www.bbc.com/news/world-asia-67015857	2026-01-18	2023-10	BBC witnesses Chinese ships blocking Philippines supply boats 6 October 2023 Virma Simonette & Joel Guinto in South China Sea and Singapore Share Save Watch: Formation of Chinese ships blocks Philippine boats The BBC has witnessed Chinese vessels blo.	59	-0.2;0.0	D	Experienced diplomatic tension (Score 0.451)	Military: Deployment of military forces to safeguard national interests in regions affected by tensions (Score 0.497) Economic: Disruptions in international trade agreements due to diplomatic tension (Score 0.453)	Military Sea denial (Score 0.499) Blockade operations (Score 0.476) Economic Aerial and maritime logistics blockade (Score 0.529) Trade blockade (Score 0.505)	Military Target maritime spaces (Score 0.449) Warships (Score 0.446) Diplomatic International courts (Score 0.507) Economic Fishing vessels (Score 0.442)	I	D	M	E						#NAME?
33	33	https://www.reuters.com/world/asia-pacific/china-says-it-lawfully-blocked-philippine-ships-going-disputed-shoal-2023-10-22/	2026-01-18	2023-10	Exclusive news, data and analytics for financial market professionals World Business Markets Sustainability Legal Commentary Technology Investigations More My News China, Philippines trade accusations over South China Sea clash By Reuters October 23,.	89	-0.2;0.0	M	Obstructed foreign logistical operations (Score 0.563)	Military: Use of military logistics and transport capabilities to compensate for the obstruction of foreign logistical operations (Score 0.557) Diplomatic: Diplomatic efforts to justify and defend the obstruction of foreign logistical operations (Score 0.523)	Military (*) Sea denial (Score 0.465) Maritime platform construction (Score 0.409) Diplomatic Diplomatic support (Score 0.558) Economic Aerial and maritime logistics blockade (Score 0.529)	Military Warships (Score 0.454) Target maritime spaces (Score 0.445) Diplomatic Allies (Score 0.471) Economic (*) Fishing vessels (Score 0.498)	I	D	M	E	Sample		0.19	-0.89	-0.7	#NAME?	0.1:-0.1	Competition
33		https://www.reuters.com/world/asia-pacific/china-says-it-lawfully-blocked-philippine-ships-going-disputed-shoal-2023-10-22/	2026-01-18	2023-10	Exclusive news, data and analytics for financial market professionals World Business Markets Sustainability Legal Commentary Technology Investigations More My News China, Philippines trade accusations over South China Sea clash By Reuters October 23,.	59	-0.2;0.0	D	Experienced diplomatic tension (Score 0.506)	Diplomatic: International support or opposition towards the country involved in the diplomatic tension (Score 0.545) Diplomatic: Shifts in diplomatic relations between the country and its key allies due to tensions (Score 0.492)	Military Sea denial (Score 0.465) Maritime platform construction (Score 0.409) Diplomatic Diplomatic support (Score 0.558) Economic Aerial and maritime logistics blockade (Score 0.529)	Military Warships (Score 0.454) Target maritime spaces (Score 0.445) Diplomatic Allies (Score 0.471) Economic Fishing vessels (Score 0.498)	I	D	M	E						#NAME?
33		https://www.reuters.com/world/asia-pacific/china-says-it-lawfully-blocked-philippine-ships-going-disputed-shoal-2023-10-22/	2026-01-18	2023-10	Exclusive news, data and analytics for financial market professionals World Business Markets Sustainability Legal Commentary Technology Investigations More My News China, Philippines trade accusations over South China Sea clash By Reuters October 23,.	65	-0.2;0.0	D	Experienced occasional frictions in international relations (Score 0.46)	Diplomatic: Increase in diplomatic disagreements between the country and its key international partners (Score 0.495) Diplomatic: Shifts in diplomatic relations with specific countries involved in the frictions (Score 0.475)	Military Sea denial (Score 0.465) Maritime platform construction (Score 0.409) Diplomatic Diplomatic support (Score 0.558) Economic Aerial and maritime logistics blockade (Score 0.529)	Military Warships (Score 0.454) Target maritime spaces (Score 0.445) Diplomatic Allies (Score 0.471) Economic Fishing vessels (Score 0.498)	D	I	E	M						#NAME?
29		https://edition.cnn.com/2023/10/26/politics/china-fighter-jet-us-bomber-south-china-sea	2026-01-18	2023-11	Chinese fighter jet got within 10 feet of US bomber over South China Sea, US military says By Natasha Bertrand, CNN 4 min read Updated 6:40 AM EDT, Fri October 27, 2023 01 china us fighter jet intercept south china sea GRAB See how close Chinese figh.	88	-0.2;0.0	M	Intimidated foreign military presence (Score 0.518)	Military: Expansion of military infrastructure to counter foreign military operations perceived as threatening (Score 0.573) Military: Engagement in joint military operations with allies to project force and prevent foreign military intimidation (Score 0.556)	Military Military operations contributing to sanctions (Score 0.509) Foreign internal defence operations (Score 0.445) Sea denial (Score 0.42) Informational Civil-military operations (Score 0.416)	Military Security forces (Score 0.419) Host nation security forces (Score 0.415) Navy (Score 0.401) Diplomatic Diplomatic representative (Score 0.405)	I	D	M	E						#NAME?
29	34	https://edition.cnn.com/2023/10/26/politics/china-fighter-jet-us-bomber-south-china-sea	2026-01-18	2023-11	Chinese fighter jet got within 10 feet of US bomber over South China Sea, US military says By Natasha Bertrand, CNN 4 min read Updated 6:40 AM EDT, Fri October 27, 2023 01 china us fighter jet intercept south china sea GRAB See how close Chinese figh.	89	-0.2;0.0	M	Obstructed foreign logistical operations (Score 0.468)	Military: Engagement in military operations to ensure national security in response to international logistical disruptions (Score 0.543) Informational: Dissemination of government messages to explain the rationale behind obstructing foreign logistical operations (Score 0.521)	Military Military operations contributing to sanctions (Score 0.509) Foreign internal defence operations (Score 0.445) Sea denial (Score 0.42) Informational (*) Civil-military operations (Score 0.416)	Military (*) Security forces (Score 0.419) Host nation security forces (Score 0.415) Navy (Score 0.401) Diplomatic Diplomatic representative (Score 0.405)	I	D	M	E	Sample		0.2	-0.68	-0.4	#NAME?	0.1:-0.1	Competition
29		https://edition.cnn.com/2023/10/26/politics/china-fighter-jet-us-bomber-south-china-sea	2026-01-18	2023-11	Chinese fighter jet got within 10 feet of US bomber over South China Sea, US military says By Natasha Bertrand, CNN 4 min read Updated 6:40 AM EDT, Fri October 27, 2023 01 china us fighter jet intercept south china sea GRAB See how close Chinese figh.	65	-0.2;0.0	D	Experienced occasional frictions in international relations (Score 0.424)	Military: Increase in military readiness to respond to potential escalation from diplomatic frictions (Score 0.506) Military: Use of military diplomacy to manage and diffuse international frictions through peaceful means (Score 0.452)	Military Military operations contributing to sanctions (Score 0.509) Foreign internal defence operations (Score 0.445) Sea denial (Score 0.42) Informational Civil-military operations (Score 0.416)	Military Security forces (Score 0.419) Host nation security forces (Score 0.415) Navy (Score 0.401) Diplomatic Diplomatic representative (Score 0.405)	D	I	E	M						#NAME?
37	35	https://www.scmp.com/news/china/military/article/3267590/chinese-military-focusing-nuclear-powered-subs-eye-us-navy-analysts	2026-01-18	2024-06	We use cookies to tailor your experience and present relevant ads. By clicking “Accept”, you agree that cookies can be placed per our Privacy Policy ACCEPT China’s military ChinaMilitary Chinese military focusing on nuclear-powered subs with eye on U.	87	-0.2;0.0	M	Increased nuclear armament capacity (Score 0.466)	Military: Expansion of nuclear-capable forces, such as submarines, bombers, or missile systems, to project power (Score 0.554) Diplomatic: International condemnation or support for the expansion of nuclear armament capacity (Score 0.546)	Military (*) Nuclear warships, aircraft, and submarines produced (Score 0.584) Sea control (Score 0.426) Sea denial (Score 0.426) Nuclear weapons developed and produced (Score 0.408)	Military (*) Nuclear arsenal (Score 0.473) Warships (Score 0.444) Navy (Score 0.424) Target maritime spaces (Score 0.407)	M	D	I	E	Sample		0.21	0.97	0.2	#NAME?	0.1:-0.1	Competition
37		https://www.scmp.com/news/china/military/article/3267590/chinese-military-focusing-nuclear-powered-subs-eye-us-navy-analysts	2026-01-18	2024-06	We use cookies to tailor your experience and present relevant ads. By clicking “Accept”, you agree that cookies can be placed per our Privacy Policy ACCEPT China’s military ChinaMilitary Chinese military focusing on nuclear-powered subs with eye on U.	57	-0.4;-0.2	M	Occupied strategic territory (Score 0.374)	Informational: Dissemination of government statements on the objectives and benefits of occupying strategic territory (Score 0.419) Military: Increase in military presence in surrounding areas to deter potential threats to the occupied territory (Score 0.389)	Military Nuclear warships, aircraft, and submarines produced (Score 0.584) Sea control (Score 0.426) Sea denial (Score 0.426) Nuclear weapons developed and produced (Score 0.408)	Military Nuclear arsenal (Score 0.473) Warships (Score 0.444) Navy (Score 0.424) Target maritime spaces (Score 0.407)	M	D	I	E						#NAME?
37		https://www.scmp.com/news/china/military/article/3267590/chinese-military-focusing-nuclear-powered-subs-eye-us-navy-analysts	2026-01-18	2024-06	We use cookies to tailor your experience and present relevant ads. By clicking “Accept”, you agree that cookies can be placed per our Privacy Policy ACCEPT China’s military ChinaMilitary Chinese military focusing on nuclear-powered subs with eye on U.	86	-0.2;0.0	M	Increased armament capacity (Score 0.36)	Military: Increase in military research and development initiatives to enhance armament capabilities (Score 0.472) Informational: Reports on the national defense strategy and its focus on strengthening armament capabilities (Score 0.456)	Military Nuclear warships, aircraft, and submarines produced (Score 0.584) Sea control (Score 0.426) Sea denial (Score 0.426) Nuclear weapons developed and produced (Score 0.408)	Military Nuclear arsenal (Score 0.473) Warships (Score 0.444) Navy (Score 0.424) Target maritime spaces (Score 0.407)	I	D	E	M						#NAME?
36		https://www.nationthailand.com/news/asean/40042257	2026-01-18	2024-10	China defies South China Sea claims, blames foreign meddling at ASEAN talks THURSDAY, OCTOBER 10, 2024 China defies South China Sea claims, blames foreign meddling at ASEAN talks EN CN Play Southeast Asian leaders stepped up pressure on China to resp.	91	0.6;0.8	D	Agreed diplomatic code of conduct (Score 0.611)	Military: Shifts in military alliances or defense cooperation as a result of clearer diplomatic guidelines and conduct (Score 0.539) Informational: Government statements explaining the principles, benefits, and objectives of the formalized diplomatic code of conduct (Score 0.537)	Military Sea denial (Score 0.489) Foreign internal defence operations (Score 0.479) Informational Harassment (Score 0.499) Harassing communications (Score 0.488)	Diplomatic Diplomatic channels (Score 0.445) Economic Global markets (Score 0.467) International trade (Score 0.463) Foreign exchange markets (Score 0.441)	D	I	M	E						#NAME?
36	36	https://www.nationthailand.com/news/asean/40042257	2026-01-18	2024-10	China defies South China Sea claims, blames foreign meddling at ASEAN talks THURSDAY, OCTOBER 10, 2024 China defies South China Sea claims, blames foreign meddling at ASEAN talks EN CN Play Southeast Asian leaders stepped up pressure on China to resp.	65	-0.2;0.0	D	Experienced occasional frictions in international relations (Score 0.557)	Diplomatic: International calls for diplomatic mediation to resolve tensions between nations (Score 0.611) Diplomatic: Increase in diplomatic disagreements between the country and its key international partners (Score 0.564)	Military Sea denial (Score 0.489) Foreign internal defence operations (Score 0.479) Informational (*) Harassment (Score 0.499) Harassing communications (Score 0.488)	Diplomatic (*) Diplomatic channels (Score 0.445) Economic Global markets (Score 0.467) International trade (Score 0.463) Foreign exchange markets (Score 0.441)	D	I	E	M	Sample		-0.22	-0.88	-0.4	#NAME?	0.1:-0.1	Conflcit
36		https://www.nationthailand.com/news/asean/40042257	2026-01-18	2024-10	China defies South China Sea claims, blames foreign meddling at ASEAN talks THURSDAY, OCTOBER 10, 2024 China defies South China Sea claims, blames foreign meddling at ASEAN talks EN CN Play Southeast Asian leaders stepped up pressure on China to resp.	57	-0.4;-0.2	M	Occupied strategic territory (Score 0.515)	Diplomatic: Shifts in national foreign policy as a result of occupying strategic territory (Score 0.537) Diplomatic: International diplomatic responses to the occupation of strategic territory (Score 0.52)	Military Sea denial (Score 0.489) Foreign internal defence operations (Score 0.479) Informational Harassment (Score 0.499) Harassing communications (Score 0.488)	Diplomatic Diplomatic channels (Score 0.445) Economic Global markets (Score 0.467) International trade (Score 0.463) Foreign exchange markets (Score 0.441)	M	D	I	E						#NAME?
27	37	https://www.navalnews.com/naval-news/2025/11/chinese-navy-takes-aircraft-carrier-fujian-into-active-service-in-hainan/	2026-01-18	2025-07	Chinese Navy Takes Aircraft Carrier Fujian Into Active Service In Hainan Published on 07/11/2025 By Alex Luck In News Fujian aircraft carrier with Chinese fleet at Sanya, South China Sea. Aircraft carrier Fujian at her commissioning ceremony on Novem.	86	-0.2;0.0	M	Increased armament capacity (Score 0.467)	Military: Deployment of military forces with new, more advanced weaponry as a result of increased armament capacity (Score 0.521) Military: Establishment of new military units or divisions focused on the use of advanced armament systems (Score 0.477)	Military (*) Nuclear warships, aircraft, and submarines produced (Score 0.469) Maritime platform construction (Score 0.462) Nuclear weapons developed and produced (Score 0.426) Economic Aerial and maritime logistics blockade (Score 0.494)	Military (*) Warships (Score 0.562) Aircrafts (Score 0.557) Navy (Score 0.525) Target maritime spaces (Score 0.486)	I	D	E	M	Sample		0.22	0.98	0.2	#NAME?	0.1:-0.1	Competition
27		https://www.navalnews.com/naval-news/2025/11/chinese-navy-takes-aircraft-carrier-fujian-into-active-service-in-hainan/	2026-01-18	2025-07	Chinese Navy Takes Aircraft Carrier Fujian Into Active Service In Hainan Published on 07/11/2025 By Alex Luck In News Fujian aircraft carrier with Chinese fleet at Sanya, South China Sea. Aircraft carrier Fujian at her commissioning ceremony on Novem.	78	-0.2;0.0	I	Eroded media influence on social media platforms (e.g., Facebook, X/Twitter, Instagram) (Score 0.452)	Informational: Media coverage of the erosion of media influence and its political and social consequences (Score 0.407) Military: Use of military technology to monitor media channels and prevent external influence on domestic media (Score 0.39)	Military Nuclear warships, aircraft, and submarines produced (Score 0.469) Maritime platform construction (Score 0.462) Nuclear weapons developed and produced (Score 0.426) Economic Aerial and maritime logistics blockade (Score 0.494)	Military Warships (Score 0.562) Aircrafts (Score 0.557) Navy (Score 0.525) Target maritime spaces (Score 0.486)	I	D	E	M						#NAME?
27		https://www.navalnews.com/naval-news/2025/11/chinese-navy-takes-aircraft-carrier-fujian-into-active-service-in-hainan/	2026-01-18	2025-07	Chinese Navy Takes Aircraft Carrier Fujian Into Active Service In Hainan Published on 07/11/2025 By Alex Luck In News Fujian aircraft carrier with Chinese fleet at Sanya, South China Sea. Aircraft carrier Fujian at her commissioning ceremony on Novem.	87	-0.2;0.0	M	Increased nuclear armament capacity (Score 0.425)	Military: Development and testing of new nuclear weapons or delivery systems to strengthen armament capacity (Score 0.501) Economic: Increase in demand for advanced military technologies or nuclear-related industries as a result of enhanced capabilities (Score 0.485)	Military Sea denial (Score 0.43) Military operations contributing to sanctions (Score 0.423) Diplomatic Denial of the exercise of rights (Score 0.45) Economic Aerial and maritime logistics blockade (Score 0.422)	Military Navy (Score 0.48) Warships (Score 0.441) Host nation security forces (Score 0.432) Economic International trade (Score 0.468)	M	D	I	E						#NAME?
24		https://www.msn.com/en-us/news/world/chinese-spy-ship-shadows-us-warships-the-navy-responds/vi-AA1R7FtF	2026-01-18	2025-11	Chinese spy ship shadows US warships - the Navy responds A Chinese surveillance ship shadowed U.S. and allied warships during Exercise Malabar 2025 near Guam, signaling Beijing’s intent to closely monitor major naval activity around this strategic hu.	89	-0.2;0.0	M	Obstructed foreign logistical operations (Score 0.486)	Military: Engagement in military operations to ensure national security in response to international logistical disruptions (Score 0.562) Military: Use of military intelligence to track and prevent foreign logistics operations from bypassing national obstructions (Score 0.555)	Military Tactical Intelligence gathering operations (Score 0.62) Defensive combat operations (Score 0.474) Informational Strategic Intelligence gathering operations (Score 0.664) Civil-military operations (Score 0.479)	Military Navy (Score 0.466) Intelligence assets (Score 0.423) Host nation security forces (Score 0.416) Warships (Score 0.409)	I	D	M	E						#NAME?
24	38	https://www.msn.com/en-us/news/world/chinese-spy-ship-shadows-us-warships-the-navy-responds/vi-AA1R7FtF	2026-01-18	2025-11	Chinese spy ship shadows US warships - the Navy responds A Chinese surveillance ship shadowed U.S. and allied warships during Exercise Malabar 2025 near Guam, signaling Beijing’s intent to closely monitor major naval activity around this strategic hu.	88	-0.2;0.0	M	Intimidated foreign military presence (Score 0.471)	Military: Use of military intelligence to track the activities and intentions of foreign military forces in the region (Score 0.616) Military: Engagement in joint military operations with allies to project force and prevent foreign military intimidation (Score 0.547)	Military Tactical Intelligence gathering operations (Score 0.62) Defensive combat operations (Score 0.474) Informational (*) Strategic Intelligence gathering operations (Score 0.664) Civil-military operations (Score 0.479)	Military (*) Navy (Score 0.466) Intelligence assets (Score 0.423) Host nation security forces (Score 0.416) Warships (Score 0.409)	I	D	M	E	Sample		0.23	-0.56	0.1	#NAME?	0.1:-0.1	Competition
24		https://www.msn.com/en-us/news/world/chinese-spy-ship-shadows-us-warships-the-navy-responds/vi-AA1R7FtF	2026-01-18	2025-11	Chinese spy ship shadows US warships - the Navy responds A Chinese surveillance ship shadowed U.S. and allied warships during Exercise Malabar 2025 near Guam, signaling Beijing’s intent to closely monitor major naval activity around this strategic hu.	83	-0.2;0.0	I	Information disseminated with a focus on disputed strategic territories (Score 0.465)	Military: Increase in military recruitment messaging emphasizing defense of disputed strategic territories (Score 0.532) Military: Engagement in public military ceremonies and events linked to disputed strategic territories (Score 0.529)	Military Tactical Intelligence gathering operations (Score 0.62) Defensive combat operations (Score 0.474) Informational Strategic Intelligence gathering operations (Score 0.664) Civil-military operations (Score 0.479)	Military Navy (Score 0.466) Intelligence assets (Score 0.423) Host nation security forces (Score 0.416) Warships (Score 0.409)	I	D	M	E						#NAME?

## Sheet: LegIlleg.
Fact ID	Summary	Leg./Illegit.	Conventions	Scale
1	In 1973-01, China seized the Paracel Islands from South Vietnam after naval combat (Leone, 2023).	illegitimate	United Nations Charter United Nations Convention on the Law of the Sea (UNCLOS) Geneva Conventions	-1
2	In 1988-03, China sank Vietnamese vessels at Johnson South Reef during a naval clash (RFA, 2018).	illegitimate	United Nations Charter United Nations Convention on the Law of the Sea (UNCLOS) Geneva Conventions	-0.9
3	In 1995-02, China constructed military structures on Mischief Reef claimed by Philippines (Shenon, 1995).	illegitimate	UN Charter UNCLOS	-0.7
4	In 2001-04, Chinese fighter collided with US surveillance aircraft near Hainan, causing crisis (Gittings, 2001).	illegitimate	Charter of the United Nations Convention on International Civil Aviation (Chicago Convention, 1944)	-0.8
5	In 2009-03, Chinese vessels harassed USNS Impeccable conducting surveillance in international waters there (Baron, 2009).	illegitimate	United Nations Convention on the Law of the Sea (UNCLOS)	-0.5
6	In 2009-03, Chinese vessels obstructed USNS Impeccable surveillance operations near Hainan in international waters (EBSCO, 2021).	illegitimate	United Nations Convention on the Law of the Sea (UNCLOS)	-0.6
7	In 2011-01, China and ASEAN adopted declaration restraining actions in South China Sea disputes (VOA,2002).	legitimate	Declaration on the Conduct of Parties in the South China Sea (DOC, 2002)	1
8	In 2012-05, Chinese and Philippine vessels standoff at Scarborough Shoal over fishing enforcement (Ortigas, 2012).	illegitimate	United Nations Convention on the Law of the Sea (UNCLOS) Declaration on the Conduct of Parties in the South China Sea (DOC, 2002)	-0.5
9	In 2012-12, Chinese boats sabotaged Vietnamese seismic exploration by cutting cables in disputed waters (Reuters,2012).	illegitimate	United Nations Convention on the Law of the Sea (UNCLOS)	-0.65
10	In 2012-12, Chinese naval vessel confronted USS Cowpens in international waters, forcing maneuvers (Lerman, 2013).	illegitimate	United Nations Convention on the Law of the Sea (UNCLOS) International Regulations for Preventing Collisions at Sea (COLREGs, 1972)	-0.62
11	In 2012-12, Chinese fishing vessels cut Vietnamese seismic cables near Gulf of Tonkin (Bloomberg, 2012).	illegitimate	United Nations Convention on the Law of the Sea (UNCLOS)	-0.75
12	In 2014-08, Chinese fighter buzzed US Navy P-8 in international airspace near Hainan (Majumdar, 2014).	illegitimate	Convention on International Civil Aviation (Chicago Convention, 1944) ICAO Annex 2 – Rules of the Air	-0.72
13	In 2015-05, Chinese vessels rammed Vietnamese boats near Paracels during oil rig standoff (AP, 2014).	illegitimate	United Nations Convention on the Law of the Sea (UNCLOS) Declaration on the Conduct of Parties in the South China Sea (DOC, 2002)	-0.5
14	In 2015-10, cyberattack disrupted Permanent Court of Arbitration hearing on SouthChinaSea case (Healey, 2015) online.	illegitimate	Charter of the United Nations Convention for the Pacific Settlement of International Disputes (1899)	-0.8
15	In 2016-05, Chinese fighters intercepted US EP-3 over South China Sea international airspace (Reuters, 2016).	illegitimate	Convention on International Civil Aviation (Chicago Convention, 1944) Code for Unplanned Encounters at Sea (CUES)	-0.55
16	In 2016-05, China scrambled fighters as USS Lawrence sailed near Fiery Cross Reef (Reuters, 2016).	illegitimate	United Nations Convention on the Law of the Sea (UNCLOS) Code for Unplanned Encounters at Sea (CUES)	-0.6
17	In 2016-06, China rejected South China Sea arbitration award ruling against its maritime claims (Xinhua, 2016).	illegitimate	United Nations Convention on the Law of the Sea (UNCLOS) Permanent Court of Arbitration Award (South China Sea Arbitration, 2016)	-0.8
18	In 2018-10, Chinese warship nearly collided with USS Decatur during Spratly freedom patrol (Meixler, 2018).	illegitimate	United Nations Convention on the Law of the Sea (UNCLOS) International Regulations for Preventing Collisions at Sea (COLREGs, 1972)	-0.58
19	In 2019-06, Chinese vessel rammed Filipino boat at Reed Bank, abandoning fishermen (Castro, 2019) there.	illegitimate	United Nations Convention on the Law of the Sea (UNCLOS) International Regulations for Preventing Collisions at Sea (COLREGs, 1972)	-0.78
20	In 2020-09, ASEAN and China pursued South China Sea code negotiations amid tensions (Hoang, 2020).	legitimate	United Nations Convention on the Law of the Sea (UNCLOS) Declaration on the Conduct of Parties in the South China Sea (DOC, 2002)	0.6
21	In 2020-09, China-linked network spread covert maritime propaganda on social media platforms globally (Graphika, 2020).	illegitimate	Charter of the United Nations	-0.4
22	In 2020-09, China proposed China-ASEAN sea-rail logistics project promoting regional green trade connectivity (AIIB, 2024).	legitimate	ASEAN Charter	0.6
23	In 2020-11, China joined ASEAN-led RCEP trade agreement integrating Asia-Pacific economies (McDonald, 2020).	legitimate	Regional Comprehensive Economic Partnership Agreement (RCEP)	0.7
24	In 2021-11, Philippines reversed China alignment, restoring US security ties amid China Sea tensions Grossman-2021.	legitimate	Mutual Defense Treaty Between the United States and the Philippines (1951)	0.5
25	In 2022-03, China militarized artificial islands with missiles and aircraft in Spratlys region (AP, 2022).	illegitimate	United Nations Convention on the Law of the Sea (UNCLOS) Declaration on the Conduct of Parties in the South China Sea (DOC, 2002)	-0.8
26	In 2023-02, Chinese coast guard aimed laser at Philippine vessel near Second Thomas Shoal (AP,2023).	illegitimate	United Nations Convention on the Law of the Sea (UNCLOS) International Regulations for Preventing Collisions at Sea (COLREGs, 1972)	-0.68
27	In 2023-05, United States and Philippines strengthened alliance under Biden and Marcos leadership (Galvez, 2023).	legitimate	Mutual Defense Treaty Between the United States and the Philippines (1951)	0.6
28	In 2023-06, Chinese warship unsafe cut across USS Chung-Hoon during Taiwan Strait transit (Regencia, 2023).	illegitimate	United Nations Convention on the Law of the Sea (UNCLOS) International Regulations for Preventing Collisions at Sea (COLREGs, 1972)	-0.4
29	In 2023-09, ASEAN and China adopted joint statement aligning AOIP and BRI cooperation (ASEAN-China, 2023).	legitimate	ASEAN Charter Charter of the United Nations Treaty of Amity and Cooperation in Southeast Asia	0.7
30	In 2023-09, China issued standard map expanding nine-dash claims angering regional neighbors (van Halteren, 2023).	illegitimate	United Nations Convention on the Law of the Sea (UNCLOS) Charter of the United Nations	-0.7
31	In 2023-10, Xi urged China Coast Guard to strengthen maritime law enforcement protecting sovereignty (ChinaDaily,2023).	legitimate	United Nations Convention on the Law of the Sea (UNCLOS)	-0.3
32	In 2023-10, Chinese coast guard blocked Philippine resupply boats at Second Thomas Shoal (BBC, 2023).	illegitimate	United Nations Convention on the Law of the Sea (UNCLOS) Permanent Court of Arbitration Award (Sout	-0.78
33	In 2023-10, Chinese coastguard collided blocking Philippine resupply boats near Second Thomas Shoal (Reuters, 2023).	illegitimate	United Nations Convention on the Law of the Sea (UNCLOS) International Regulations for Preventing Collisions at Sea (COLREGs, 1972) Permanent Court of Arbitration Award (South China Sea Arbitration, 2016)	-0.7
34	In 2023-11, Chinese fighter flew within ten feet of US B-52 over SouthChinaSea (Bertrand, 2023).	illegitimate	Convention on International Civil Aviation (Chicago Convention, 1944) ICAO Annex 2 – Rules of the Air	-0.4
35	In 2024-06, China expanded nuclear-powered submarine force to enhance deterrence and long-range operations (Zhao, 2024).	legitimate	Charter of the United Nations	0.2
36	In 2024-10, China rejected ASEAN criticism on South China Sea, blaming foreign interference (Reuters, 2024).	illegitimate	United Nations Convention on the Law of the Sea (UNCLOS) Declaration on the Conduct of Parties in the South China Sea (DOC, 2002) ASEAN Charter	-0.4
37	In 2025-07, China commissioned aircraft carrier Fujian into active service at Sanya base (Luck, 2025).	legitimate	Charter of the United Nations	0.2
38	In 2025-11, Chinese surveillance ship shadowed US warships during Exercise Malabar near Guam safely (NavyChannel,2025).	legitimate	United Nations Convention on the Law of the Sea (UNCLOS)	0.1

## Sheet: Impact_Matrix
Fact	1º	2º	3º	4º	1º	2º	3º	4º
In 1973-01, China seized the Paracel Islands from South Vietnam after naval combat (Leone, 2023).	M	D	I	E	0.72	0.83	0.42	0.22			D	I	M	E
In 1988-03, China sank Vietnamese vessels at Johnson South Reef during a naval clash (RFA, 2018).	D	M	E	I	0.73	0.84	0.33	0.44		1º	0.790909	0.777143	0.8425	0.915
In 1995-02, China constructed military structures on Mischief Reef claimed by Philippines (Shenon, 1995).	M	D	I	E	0.84	0.62	0.46	0.36		2º	0.77	0.75375	0.693333	0
In 2001-04, Chinese fighter collided with US surveillance aircraft near Hainan, causing crisis (Gittings, 2001).	D	I	E	M	0.85	0.74	0.24	0.38		3º	0	0.572	0.581	0.541538
In 2009-03, Chinese vessels harassed USNS Impeccable conducting surveillance in international waters there (Baron, 2009).	I	D	M	E	0.74	0.64	0.56	0.24		4º	0	0.505	0.296364	0.361739
In 2009-03, Chinese vessels obstructed USNS Impeccable surveillance operations near Hainan in international waters (EBSCO, 2021).	I	D	M	E	0.75	0.86	0.58	0.66
In 2011-01, China and ASEAN adopted declaration restraining actions in South China Sea disputes (VOA,2002).	D	I	M	E	0.86	0.65	0.35	0.48
In 2012-05, Chinese and Philippine vessels standoff at Scarborough Shoal over fishing enforcement (Ortigas, 2012).	I	D	M	E	0.76	0.87	0.57	0.34
In 2012-12, Chinese boats sabotaged Vietnamese seismic exploration by cutting cables in disputed waters (Reuters,2012).	I	D	M	E	0.77	0.88	0.36	0.58
In 2012-12, Chinese naval vessel confronted USS Cowpens in international waters, forcing maneuvers (Lerman, 2013).	D	M	E	I	0.78	0.66	0.48	0.68
In 2012-12, Chinese fishing vessels cut Vietnamese seismic cables near Gulf of Tonkin (Bloomberg, 2012).	I	D	M	E	0.79	0.89	0.37	0.56
In 2014-08, Chinese fighter buzzed US Navy P-8 in international airspace near Hainan (Majumdar, 2014).	I	D	M	E	0.71	0.85	0.54	0.26
In 2015-05, Chinese vessels rammed Vietnamese boats near Paracels during oil rig standoff (AP, 2014).	D	I	E	M	0.72	0.86	0.45	0.36
In 2015-10, cyberattack disrupted Permanent Court of Arbitration hearing on SouthChinaSea case (Healey, 2015) online.	I	D	M	E	0.92	0.74	0.35	0.24
In 2016-05, Chinese fighters intercepted US EP-3 over South China Sea international airspace (Reuters, 2016).	I	D	M	E	0.83	0.75	0.56	0.26
In 2016-05, China scrambled fighters as USS Lawrence sailed near Fiery Cross Reef (Reuters, 2016).	I	D	M	E	0.64	0.76	0.66	0.36
In 2016-06, China rejected South China Sea arbitration award ruling against its maritime claims (Xinhua, 2016).	I	D	M	E	0.84	0.95	0.35	0.46
In 2018-10, Chinese warship nearly collided with USS Decatur during Spratly freedom patrol (Meixler, 2018).	I	D	M	E	0.75	0.87	0.87	0.26
In 2019-06, Chinese vessel rammed Filipino boat at Reed Bank, abandoning fishermen (Castro, 2019) there.	I	D	M	E	0.56	0.46	0.76	0.66
In 2020-09, ASEAN and China pursued South China Sea code negotiations amid tensions (Hoang, 2020).	I	D	M	E	0.82	0.58	0.46	0.26
In 2020-09, China-linked network spread covert maritime propaganda on social media platforms globally (Graphika, 2020).	I	D	E	M	0.93	0.68	0.56	0.26
In 2020-09, China proposed China-ASEAN sea-rail logistics project promoting regional green trade connectivity (AIIB, 2024).	M	D	E	I	0.84	0.56	0.46	0.14
In 2020-11, China joined ASEAN-led RCEP trade agreement integrating Asia-Pacific economies (McDonald, 2020).	E	D	I	M	0.95	0.76	0.56	0.14
In 2021-11, Philippines reversed China alignment, restoring US security ties amid China Sea tensions Grossman-2021.	D	I	E	M	0.85	0.58	0.76	0.36
In 2022-03, China militarized artificial islands with missiles and aircraft in Spratlys region (AP, 2022).	I	D	M	E	0.96	0.96	0.78	0.56
In 2023-02, Chinese coast guard aimed laser at Philippine vessel near Second Thomas Shoal (AP,2023).	I	D	M	E	0.66	0.78	0.76	0.26
In 2023-05, United States and Philippines strengthened alliance under Biden and Marcos leadership (Galvez, 2023).	D	I	E	M	0.77	0.88	0.86	0.56
In 2023-06, Chinese warship unsafe cut across USS Chung-Hoon during Taiwan Strait transit (Regencia, 2023).	D	M	E	I	0.68	0.58	0.26	0.76
In 2023-09, ASEAN and China adopted joint statement aligning AOIP and BRI cooperation (ASEAN-China, 2023).	E	D	I	M	0.88	0.76	0.56	0.26
In 2023-09, China issued standard map expanding nine-dash claims angering regional neighbors (van Halteren, 2023).	D	I	E	M	0.89	0.78	0.46	0.16
In 2023-10, Xi urged China Coast Guard to strengthen maritime law enforcement protecting sovereignty (ChinaDaily,2023).	D	I	E	M	0.69	0.77	0.86	0.26
In 2023-10, Chinese coast guard blocked Philippine resupply boats at Second Thomas Shoal (BBC, 2023).	I	D	M	E	0.78	0.88	0.66	0.26
In 2023-10, Chinese coastguard collided blocking Philippine resupply boats near Second Thomas Shoal (Reuters, 2023).	I	D	M	E	0.89	0.89	0.66	0.26
In 2023-11, Chinese fighter flew within ten feet of US B-52 over SouthChinaSea (Bertrand, 2023).	I	D	M	E	0.68	0.77	0.66	0.26
In 2024-06, China expanded nuclear-powered submarine force to enhance deterrence and long-range operations (Zhao, 2024).	M	D	I	E	0.97	0.76	0.86	0.26
In 2024-10, China rejected ASEAN criticism on South China Sea, blaming foreign interference (Reuters, 2024).	D	I	E	M	0.88	0.77	0.46	0.26
In 2025-07, China commissioned aircraft carrier Fujian into active service at Sanya base (Luck, 2025).	I	D	E	M	0.98	0.78	0.86	0.26
In 2025-11, Chinese surveillance ship shadowed US warships during Exercise Malabar near Guam safely (NavyChannel,2025).	I	D	M	E	0.56	0.66	0.76	0.26

## Sheet: C&E_Matrix
Nº					01	02	03	04	05	06	07	08	09	10	11	12	13	14	15	16
	DIME				D	D	D	D	D	I	I	M	M	M	M	M	M	M	E	E
			Effect		Experienced occasional frictions in international relations	Agreed diplomatic code of conduct	Rejected binding international legal ruling	Experienced diplomatic tension	Undermined multilateral codes of conduct and legal frameworks	Information disseminated with a focus on disputed strategic territories	Eroded media influence on social media platforms (e.g., Facebook, X/Twitter, Instagram)	Occupied strategic territory	Militarised disputed territory	Intimidated foreign military presence	Obstructed foreign logistical operations	Asserted sovereignty	Increased nuclear armament capacity	Increased armament capacity	Destroyed infrastructure or assets	Strengthened regional economic connectivity
		Cause (Fact)
01	D	4			0.8	0.1	0.1	0.9	0.3	0.4	0.2	0	0.2	0.6	0.4	0.5	0	0.2	0.2	0			D	I	M	E
02	D	7			0.3	0.9	0	0.4	0.3	0.2	0.1	0	0.1	0.1	0	0.2	0	0.1	0	0.4		D	0.46	0.427273	0.296104	0.131818
03	D	13			0.7	0	0.1	0.8	0.6	0.4	0.3	0.5	0.6	0.7	0.6	0.7	0	0.4	0.3	0.1		I	0.413333	0.566667	0.204762	0.0333333
04	D	17			0.6	0	1	0.8	0.9	0.6	0.4	0.2	0.4	0.5	0.3	0.9	0	0.2	0	0.1		M	0.424762	0.264286	0.443537	0.0571429
05	D	19			0.7	0	0.1	0.8	0.6	0.5	0.4	0.3	0.5	0.7	0.6	0.7	0	0.4	0.3	0.1		E	0.32	0.283333	0.047619	0.4
06	D	20			0.4	0.8	0	0.5	0.4	0.3	0.2	0	0.1	0.1	0.1	0.2	0	0.1	0	0.4
07	D	24			0.6	0.2	0.2	0.7	0.4	0.5	0.4	0	0.2	0.4	0.3	0.3	0	0.3	0	0.2
08	D	27			0.7	0.3	0.3	0.8	0.5	0.6	0.5	0.1	0.4	0.6	0.5	0.4	0	0.6	0	0.3
09	D	30			0.6	0	0.4	0.7	0.8	0.9	0.6	0.2	0.3	0.3	0.2	0.9	0	0.2	0	0.1
10	D	31			0.5	0	0.2	0.6	0.6	0.5	0.3	0.3	0.6	0.7	0.6	0.8	0	0.4	0.2	0.1
11	D	36			0.6	0	0.3	0.7	0.7	0.6	0.5	0	0.1	0.2	0.1	0.5	0	0.1	0	0.1
12	I	6			0.6	0	0.1	0.7	0.5	0.4	0.2	0	0.3	0.7	0.8	0.6	0	0.2	0	0
13	I	14			0.5	0	0.7	0.6	0.8	0.6	0.5	0	0.1	0.2	0.1	0.6	0	0.1	0	0
14	I	21			0.4	0	0.2	0.5	0.6	0.9	0.8	0	0	0.1	0	0.5	0	0	0	0.2
15	M	1			0.6	0	0.3	0.7	0.6	0.2	0.1	0.9	0.8	0.5	0.3	0.9	0	0.4	0.3	0
16	M	2			0.7	0	0.3	0.8	0.7	0.2	0.1	0.8	0.8	0.6	0.4	0.9	0	0.5	0.4	0
17	M	3			0.6	0	0.4	0.7	0.8	0.3	0.2	0.7	0.8	0.5	0.4	0.9	0	0.5	0.2	0.1
18	M	5			0.6	0	0.1	0.7	0.5	0.3	0.2	0	0.3	0.8	0.8	0.6	0	0.2	0	0
19	M	8			0.7	0	0.2	0.8	0.7	0.4	0.3	0.6	0.6	0.6	0.5	0.8	0	0.4	0.1	0.1
20	M	9			0.6	0	0.2	0.7	0.7	0.3	0.2	0.2	0.3	0.4	0.6	0.7	0	0.3	0.4	0.1
21	M	10			0.6	0	0.1	0.7	0.5	0.3	0.2	0	0.3	0.8	0.7	0.6	0	0.3	0	0
22	M	11			0.6	0	0.2	0.7	0.7	0.3	0.2	0.2	0.3	0.4	0.6	0.7	0	0.3	0.4	0.1
23	M	12			0.6	0	0.1	0.7	0.5	0.3	0.2	0	0.2	0.8	0.6	0.6	0	0.2	0	0
24	M	15			0.6	0	0.2	0.7	0.6	0.3	0.2	0	0.3	0.8	0.6	0.6	0	0.3	0	0
25	M	16			0.6	0	0.2	0.7	0.6	0.3	0.2	0.2	0.5	0.8	0.6	0.7	0	0.4	0	0
26	M	18			0.7	0	0.2	0.8	0.6	0.3	0.2	0.1	0.4	0.9	0.7	0.7	0	0.4	0	0
27	M	25			0.6	0	0.3	0.7	0.8	0.4	0.3	0.6	0.9	0.8	0.6	0.9	0	0.8	0	0.1
28	M	26			0.7	0	0.2	0.8	0.6	0.4	0.3	0.1	0.4	0.9	0.7	0.8	0	0.4	0	0
29	M	28			0.6	0	0.2	0.7	0.5	0.3	0.2	0	0.3	0.8	0.6	0.6	0	0.4	0	0
30	M	32			0.7	0	0.3	0.8	0.7	0.4	0.3	0.3	0.6	0.9	0.8	0.8	0	0.5	0	0
31	M	33			0.7	0	0.3	0.8	0.7	0.4	0.3	0.3	0.6	0.9	0.8	0.8	0	0.5	0.1	0
32	M	34			0.6	0	0.2	0.7	0.5	0.3	0.2	0	0.3	0.9	0.6	0.6	0	0.4	0	0
33	M	35			0.5	0	0.2	0.6	0.4	0.2	0.1	0	0.2	0.3	0.2	0.4	0.9	0.8	0	0
34	M	37			0.5	0	0.2	0.6	0.4	0.3	0.2	0.1	0.4	0.6	0.3	0.5	0.4	0.8	0	0
35	M	38			0.4	0	0.1	0.5	0.3	0.4	0.3	0	0.1	0.3	0.2	0.4	0	0.2	0	0
36	E	22			0.2	0.6	0	0.3	0.2	0.3	0.2	0	0	0	0	0.1	0	0.1	0	0.9
37	E	23			0.3	0.7	0	0.4	0.3	0.3	0.2	0	0	0	0	0.2	0	0.2	0	0.8
38	E	29			0.3	0.8	0	0.4	0.3	0.4	0.3	0	0	0	0	0.2	0	0.2	0	0.7

[truncated: 1 more sheets: Final_Cause_Impact_Matrix]
