# Supplementary material
Source: Research Square preprint supplement (doi:10.21203/rs.3.rs-9449467/v1)
Supplement: Supplementary file 1 [file 107e4981714cbe27e98400fd.pdf]

```

1 # BLOQUE 0: Autenticación y conexión a Google Sheets
2
3 from google.colab import auth
4 from google.auth import default
5 from googleapiclient.discovery import build
6
7 # Autenticarse con tu cuenta de Google
8 auth.authenticate_user()
9 creds, _ = default()
10
11 # Crear servicio de acceso a Google Sheets
12 sheet = build('sheets','v4', credentials=creds).spreadsheets()
13
14 # ID de tu hoja de cálculo
15 SPREADSHEET_ID = '1067tA_8QWbVzUa4TYylrpE1ER2S5GyEBB8svgKc08C0' # Colocar aquí el ID de Google
16

```

```

1 # BLOQUE 1: Obtener texto (desde enlace o texto manual)
2
3 import requests
4 from bs4 import BeautifulSoup
5
6 def extraer_texto_de_noticia(url):
7     try:
8         response = requests.get(url, timeout=10)
9         response.raise_for_status()
10
11         soup = BeautifulSoup(response.text, 'html.parser')
12         parrafos = soup.find_all('p')
13         texto = ' '.join([p.get_text() for p in parrafos])
14         texto_limpio = ' '.join(texto.split())
15         return texto_limpio
16
17     except Exception as e:
18         print("Error al procesar la noticia:", e)
19         return None
20
21
22 # ===== ELEGIR UNA OPCIÓN =====
23
24 # OPCIÓN A: usar enlace (dejá texto_manual = None)/OPCIÓN B: usar texto (dejá url = None)
25 url = None #'https://thediplomat.com/2014/08/chinas-dangerous-intercept-of-us-spy-plane/'
26 texto_manual = ""
27
28 Chinese navy ship confronts U.S. cruiser amid tensions
29 David Lerman BLOOMBERG NEWS
30 Dec. 13, 2013Updated Dec. 14, 2013, 1:36 p.m. ET
31
32 A U.S. Navy guided-missile cruiser had a confrontation with a Chinese military ship on Dec. 5
33
34 The USS Cowpens, operating in international waters, and a Chinese naval vessel "had an encount
35
36 "This incident underscores the need to ensure the highest standards of professional seamanship
37
38 China was probably angry that the Cowpens may have been trying to spy on China's only aircraft
39
40 "This was not an accident," Cheng said in an interview. "It was deliberate. The Chinese are ra
41
42 The U.S. government lodged protests over the incident with Chinese officials in Beijing and Wa
43
44 The Chinese embassy in Washington didn't immediately respond to an e-mailed request for commer
45
46 The near-collision, while it was resolved peacefully, hints at the growing risk of confrontati
47
48 China last month unnerved its neighbors by declaring an air defense identification zone in the

```

```

49
50 'More Tension'
51
52 "I think we're going to see much more tension in the air and on the surface," Cheng said. "In
53
54 The Chinese vessel tried to force the Cowpens to stop, causing a military standoff, according
55
56 After a second Chinese ship sailed in front of the Cowpens and stopped, the U.S. vessel was fo
57
58 "It's getting dangerous out there," said Patrick Cronin, a senior adviser for the Asia-Pacific
59
60 Cronin said the incident appeared to be a "tit-for-tat" response to the U.S. refusing to recog
61
62 "We're making them look impotent with respect to the ADIZ," Cronin said, referring to the acro
63
64 By trying to block a U.S. ship, China is engaging in "coercive diplomacy – it's neither war nc
65
66
67 ""
68
69 # OPCIÓN B: pegar texto manual (dejá url = None)
70 # url = None
71 # texto_manual =
72
73
74 # ===== LÓGICA =====
75
76 if texto_manual and texto_manual.strip():
77     noticia = ' '.join(texto_manual.split())
78 elif url and url.strip():
79     noticia = extraer_texto_de_noticia(url)
80 else:
81     noticia = None
82
83 # Ver resumen sin que explote si falla
84 if noticia:
85     print(noticia[:500])
86 else:
87     print("⚠️ No se pudo obtener texto. Usá texto_manual o probá otro enlace.")
88

```

Chinese navy ship confronts U.S. cruiser amid tensions David Lerman BLOOMBERG NEWS Dec. 13, 2013Up

```

1 # BLOQUE2: Comparación de EFECTOS con el texto de la noticia (POR VENTANAS DE 2 ORACIONES, tc
2
3 !pip install -q sentence-transformers
4
5 from sentence_transformers import SentenceTransformer, util
6 import torch
7 import re
8
9 modelo = SentenceTransformer('all-MiniLM-L6-v2')
10
11 # 1) Normalizar el texto (limpieza simple)
12 texto = ' '.join(noticia.split())
13
14 # 2) Separar en oraciones (corte simple por puntuación)
15 oraciones = [o.strip() for o in re.split(r'(?<=[\.\?\!\])\s+', texto) if o.strip()]
16
17 # 3) Crear "ventanas" de 2 oraciones (chunking)
18 ventanas = []
19 for i in range(len(oraciones)):
20     ventana = " ".join(oraciones[i:i+2]) # 2 oraciones
21     if ventana:
22         ventanas.append(ventana)
23

```

```

24 # Si por alguna razón quedan muy pocas, usar el texto completo como respaldo
25 if len(ventanas) < 2:
26     ventanas = [texto]
27
28 # Embeddings de cada ventana
29 embeddings_ventanas = modelo.encode(ventanas, convert_to_tensor=True)
30
31 # 4) Leer efectos estratégicos
32 result = sheet.values().get(
33     spreadsheetId=SPREADSHEET_ID,
34     range='List of Strategic Effects_cop!A2:H'
35 ).execute()
36
37 values = result.get('values', [])
38
39 # 5) Calcular similitud (máxima) para cada efecto
40 correlaciones_efectos = []
41 MIN_SCORE_EFECTOS = 0.35
42 TOP_K_EFECTOS = 3
43
44 for fila in values:
45     if len(fila) >= 8:
46         efecto_texto = fila[3]
47         embedding_efecto = modelo.encode(efecto_texto, convert_to_tensor=True)
48         sims = util.pytorch_cos_sim(embeddings_ventanas, embedding_efecto).squeeze()
49         similitud = float(torch.max(sims).item())
50
51         # Guardar TODO (sin umbral fijo)
52         correlaciones_efectos.append({
53             "ID": fila[0],
54             "Component": fila[1],
55             "Intensity of Force": fila[2],
56             "Strategic Effect": fila[3],
57             "Col_E": fila[4],
58             "Col_F": fila[5],
59             "Col_G": fila[6],
60             "Col_H": fila[7],
61             "Similarity Score": round(similitud, 3)
62         })
63
64 # Filtrar por mínimo + ordenar + tomar TOP 3
65 correlaciones_efectos = [c for c in correlaciones_efectos if c["Similarity Score"] >= MIN_SCORE_EFECTOS]
66 correlaciones_efectos.sort(key=lambda x: x["Similarity Score"], reverse=True)
67 correlaciones_efectos = correlaciones_efectos[:TOP_K_EFECTOS]
68
69 # Resultado
70 # Resultado
71 if correlaciones_efectos:
72
73     # Ordenar por Score de similitud (de mayor a menor)
74     correlaciones_efectos.sort(
75         key=lambda x: x.get("Similarity Score", 0),
76         reverse=True
77     )
78
79     print(f"✅ Cantidad de correlaciones: {len(correlaciones_efectos)}")
80     print(f"🚀 Listado de efectos (ordenados por similitud):\n")
81
82     for c in correlaciones_efectos:
83         print(
84             f"ID {c['ID']} - "
85             f"{c['Strategic Effect']} "
86             f"[{c['Intensity of Force']}] "
87             f"(Score {c['Similarity Score']})"
88         )
89
90 else:

```

```

91 print("✘ No se encontraron correlaciones semánticas suficientes (≥ 0.35).")
92
93

```

WARNING:torchao.kernel.intmm:Warning: Detected no triton, on systems without Triton certain kernel  
 /usr/local/lib/python3.12/dist-packages/huggingface\_hub/utils/\_auth.py:94: UserWarning:  
 The secret `HF\_TOKEN` does not exist in your Colab secrets.  
 To authenticate with the Hugging Face Hub, create a token in your settings tab (<https://huggingface.com>)  
 You will be able to reuse this secret in all of your notebooks.  
 Please note that authentication is recommended but still optional to access public models or datasets

```

modules.json: 100% 349/349 [00:00<00:00, 22.9kB/s]
config_sentence_transformers.json: 100% 116/116 [00:00<00:00, 8.66kB/s]
README.md: 10.5k/? [00:00<00:00, 770kB/s]
sentence_bert_config.json: 100% 53.0/53.0 [00:00<00:00, 5.46kB/s]
config.json: 100% 612/612 [00:00<00:00, 63.0kB/s]
model.safetensors: 100% 90.9M/90.9M [00:01<00:00, 102MB/s]
tokenizer_config.json: 100% 350/350 [00:00<00:00, 26.3kB/s]
vocab.txt: 232k/? [00:00<00:00, 6.11MB/s]
tokenizer.json: 466k/? [00:00<00:00, 15.5MB/s]
config.json: 100% 190/190 [00:00<00:00, 8.46kB/s]

```

WARNING:google\_auth\_httplib2:httplib2 transport does not support per-request timeout. Set the time  
 WARNING:google\_auth\_httplib2:httplib2 transport does not support per-request timeout. Set the time

✓ Cantidad de correlaciones: 3  
 ✦ Listado de efectos (ordenados por similitud):

ID 28 - Neutralised diplomatic cooperation [-0.6;-0.4] (Score 0.495)  
 ID 58 - Militarised disputed territory [-0.4;-0.2] (Score 0.494)  
 ID 83 - Information disseminated with a focus on disputed strategic territories [-0.2;0.0] (Score

```

1 # BLOQUE 3: Comparación con los indicadores (TOP 2 POR EFECTO EN 1 CELDA)
2
3 # Lista de IDs correlacionados desde la etapa anterior (NORMALIZADOS)
4 ids_detectados_set = set(str(correlacion["ID"]).strip() for correlacion in correlaciones_efecto)
5
6 # Leer hoja "Indicators"
7 result_ind = sheet.values().get(
8     spreadsheetId=SPREADSHEET_ID,
9     range='Indicators!A2:C'
10 ).execute()
11
12 valores_indicadores = result_ind.get('values', [])
13
14 # Guardamos indicadores por ID de efecto
15 indicadores_por_id = {} # clave: ID efecto, valor: lista de indicadores (con score)
16
17 for fila in valores_indicadores:
18     if len(fila) >= 3:
19         id_indicador = str(fila[0]).strip()
20         tipo_indicador = fila[1]
21         texto_indicador = fila[2]
22
23         # ✓ FILTRO Estricto: solo evaluar indicadores cuyo ID esté en los efectos detectados
24         if id_indicador not in ids_detectados_set:
25             continue
26
27         embedding_indicador = modelo.encode(texto_indicador, convert_to_tensor=True)
28         sims = util.pytorch_cos_sim(embeddings_ventanas, embedding_indicador).squeeze()

```

```

29     similitud = float(torch.max(sims).item())
30
31     if similitud >= 0.2: # Umbral ajustable
32         if id_indicador not in indicadores_por_id:
33             indicadores_por_id[id_indicador] = []
34
35         indicadores_por_id[id_indicador].append({
36             "Type": tipo_indicador,
37             "Text": texto_indicador,
38             "Score": round(similitud, 3)
39         })
40
41 # Armar 1 texto por ID con TOP 2 indicadores
42 indicadores_texto_por_id = {} # clave: ID efecto, valor: string con TOP2
43 for id_efecto, lista in indicadores_por_id.items():
44     lista_ordenada = sorted(lista, key=lambda x: x["Score"], reverse=True)[:2]
45     texto_celda = "\n".join([f"{x['Type']}: {x['Text']} (Score {x['Score']})" for x in lista_ordenada])
46     indicadores_texto_por_id[id_efecto] = texto_celda
47
48 # (Opcional) Mostrar por pantalla
49 if indicadores_texto_por_id:
50     # IDs que sí tienen indicadores (para condición de suficiencia en el bloque final)
51     ids_con_indicadores = set(indicadores_texto_por_id.keys())
52
53     print("✅ TOP 2 indicadores por efecto (en 1 celda):")
54     for k, v in indicadores_texto_por_id.items():
55         print(f"\nID {k}: \n{v}")
56 else:
57     ids_con_indicadores = set()
58     print("❌ No se encontraron indicadores correlacionados. El proceso se detiene.")
59

```

✅ TOP 2 indicadores por efecto (en 1 celda):

ID 28:

Diplomatic: Increase in domestic political unrest or protests due to perceived diplomatic failure  
 Military: Use of military diplomacy to rebuild or strengthen international relationships post-neut

ID 58:

Military: Strategic use of air, naval, and ground forces to assert territorial claims in disputed  
 Military: Use of military diplomacy to assert territorial claims and de-escalate tensions in milit

ID 83:

Military: Military involvement in securing borders and access points related to disputed strategic  
 Diplomatic: Creation of narratives highlighting historical ties and sovereign claims over disputed

```

1 # BLOQUE 4: Comparación con los medios y modos (Means y Ways independientes)
2 # Regla: HASTA 4 resultados por lista, SOLO si superan el umbral mínimo
3
4 # Parámetros del bloque
5 MIN_SCORE_MM = 0.35 # umbral mínimo de relevancia
6 TOP_K_MM = 4 # HASTA 4 (no obligatorio llegar a 4)
7
8 medios_detectados = []
9 modos_detectados = []
10
11 def detectar_y_guardar_medio_modo(entrada, tipo, es_medio=True):
12     entrada_txt = str(entrada).strip()
13     if not entrada_txt:
14         return
15
16     embedding_item = modelo.encode(entrada_txt, convert_to_tensor=True)
17     sims = util.pytorch_cos_sim(embeddings_ventanas, embedding_item).squeeze()
18     similitud = float(torch.max(sims).item())
19
20     item = {
21         "Tipo": tipo,

```

```
22     "Texto": entrada_txt,
23     "Score": round(similitud, 3)
24 }
25
26 if es_medio:
27     medios_detectados.append(item)
28 else:
29     modos_detectados.append(item)
30
31 # --- Diplomatic ---
32 political_data = sheet.values().get(
33     spreadsheetId=SPREADSHEET_ID,
34     range='Diplomatic Ways & Means!A2:B'
35 ).execute().get('values', [])
36
37 for fila in political_data:
38     if len(fila) >= 1 and fila[0]:
39         detectar_y_guardar_medio_modo(fila[0], "Diplomatic", es_medio=True)
40     if len(fila) >= 2 and fila[1]:
41         detectar_y_guardar_medio_modo(fila[1], "Diplomatic", es_medio=False)
42
43 # --- Economic ---
44 economic_data = sheet.values().get(
45     spreadsheetId=SPREADSHEET_ID,
46     range='Economic Ways & Means!A2:B'
47 ).execute().get('values', [])
48
49 for fila in economic_data:
50     if len(fila) >= 1 and fila[0]:
51         detectar_y_guardar_medio_modo(fila[0], "Economic", es_medio=True)
52     if len(fila) >= 2 and fila[1]:
53         detectar_y_guardar_medio_modo(fila[1], "Economic", es_medio=False)
54
55 # --- Military ---
56 military_data = sheet.values().get(
57     spreadsheetId=SPREADSHEET_ID,
58     range='Military Ways & Means!A2:B'
59 ).execute().get('values', [])
60
61 for fila in military_data:
62     if len(fila) >= 1 and fila[0]:
63         detectar_y_guardar_medio_modo(fila[0], "Military", es_medio=True)
64     if len(fila) >= 2 and fila[1]:
65         detectar_y_guardar_medio_modo(fila[1], "Military", es_medio=False)
66
67 # --- Informational ---
68 informational_data = sheet.values().get(
69     spreadsheetId=SPREADSHEET_ID,
70     range='Informational Ways & Means!A2:B'
71 ).execute().get('values', [])
72
73 for fila in informational_data:
74     if len(fila) >= 1 and fila[0]:
75         detectar_y_guardar_medio_modo(fila[0], "Informational", es_medio=True)
76     if len(fila) >= 2 and fila[1]:
77         detectar_y_guardar_medio_modo(fila[1], "Informational", es_medio=False)
78
79 # --- Selección final: umbral + HASTA TOP_K ---
80 medios_detectados = [m for m in medios_detectados if m["Score"] >= MIN_SCORE_MM]
81 modos_detectados = [w for w in modos_detectados if w["Score"] >= MIN_SCORE_MM]
82
83 medios_detectados.sort(key=lambda x: x["Score"], reverse=True)
84 modos_detectados.sort(key=lambda x: x["Score"], reverse=True)
85
86 medios_detectados = medios_detectados[:TOP_K_MM]
87 modos_detectados = modos_detectados[:TOP_K_MM]
88
```

```

89 # --- Resultados ---
90 print("\n✅ Medios (Means) detectados (HASTA 4, ordenados por similitud):")
91 for m in medios_detectados:
92     print(f"→ ({m['Tipo']}) {m['Texto']} [Score: {m['Score']}]")
93
94 print("\n✅ Modos (Ways) detectados (HASTA 4, ordenados por similitud):")
95 for w in modos_detectados:
96     print(f"→ ({w['Tipo']}) {w['Texto']} [Score: {w['Score']}]")
97

```

✅ Medios (Means) detectados (HASTA 4, ordenados por similitud):

```

→ (Military) Warships [Score: 0.49]
→ (Military) Navy [Score: 0.475]
→ (Military) Target maritime spaces [Score: 0.474]
→ (Military) Security forces [Score: 0.41]

```

✅ Modos (Ways) detectados (HASTA 4, ordenados por similitud):

```

→ (Military) Crisis response operations [Score: 0.513]
→ (Military) Counterinsurgency operations [Score: 0.511]
→ (Informational) Force confrontation [Score: 0.469]
→ (Military) Assassination operations [Score: 0.45]

```

```

1 import re
2 from datetime import datetime
3
4 # --- Datos del hecho ---
5 fact_id = "10" # Esto luego lo podemos automatizar
6 fecha_analisis = datetime.today().strftime('%Y-%m-%d')
7 resumen = noticia[:250] + "."
8
9 # --- URL del hecho (carga manual si la noticia se pegó a mano) ---
10 url_manual = "https://www.telegram.com/story/news/state/2013/12/14/chinese-navy-ship-confror
11
12 # URL efectiva para exportación (siempre queda algo)
13 if url_manual:
14     url_export = url_manual
15 else:
16     url_export = url if 'url' in globals() and url else "No URL"
17
18 # --- Fecha del hecho (carga manual) ---
19 # 🍌 completar siempre antes de ejecutar
20
21 mes_hecho = "12" # ejemplo: "06", sin fecha:"n.d."
22 anio_hecho = "2012" # ejemplo: "2023"
23
24 if mes_hecho and anio_hecho:
25     fecha_hecho = f"{anio_hecho}-{mes_hecho}"
26 else:
27     fecha_hecho = "No date registered"
28
29 # --- Agrupar medios / modos por componente en una sola celda (con saltos de línea) ---
30 def agrupar_por_tipo(lista_items):
31     # Orden de encabezados por componente (DIME)
32     orden_tipos = ["Military", "Diplomatic", "Economic", "Informational"]
33
34     grupos = {}
35     for it in lista_items:
36         grupos.setdefault(it["Tipo"], []).append(it)
37
38     lineas = []
39     for tipo in orden_tipos:
40         if tipo in grupos and grupos[tipo]:
41             lineas.append(tipo)
42             # dentro del tipo, ordenar por Score desc
43             for it in sorted(grupos[tipo], key=lambda x: x.get("Score", 0), reverse=True):
44                 lineas.append(f"{it['Texto']} (Score {it['Score']})")

```

```

45
46     return "\n".join(lineas)
47
48
49 # --- Construcción de filas resultado ---
50 filas_resultado = []
51
52 # ✅ condición de suficiencia global: si no hay medios o no hay modos, no exportar nada
53 if not medios_detectados or not modos_detectados:
54     print("❌ No se exporta: faltan Means o Ways.")
55 else:
56     means_celda = agrupar_por_tipo(medios_detectados)
57     ways_celda = agrupar_por_tipo(modos_detectados)
58
59     for efecto in correlaciones_efectos:
60         efecto_id = efecto["ID"]
61         efecto_component = efecto["Component"]
62
63         # ✅ condición de suficiencia por efecto:
64         # si este efecto NO tiene indicadores, NO sigue y NO exporta
65         if efecto_id not in ids_con_indicadores:
66             continue
67
68         efecto_nombre = f"{efecto['Strategic Effect']} (Score {efecto['Similarity Score']})"
69         intensidad = efecto["Intensity of Force"]
70
71         # Indicadores TOP 2 (1 celda) para este efecto
72         indicadores_celda = indicadores_texto_por_id[efecto_id]
73
74         # ✅ 1 fila por efecto (ya NO se combinan medios x modos)
75         fila = [
76             fact_id,
77             url_export,
78             fecha_analisis,
79             fecha_hecho,
80             resumen,
81             efecto_id,
82             intensidad,
83             efecto_component,
84             efecto_nombre,
85             indicadores_celda,
86             ways_celda,
87             means_celda,
88             efecto["Col_E"],
89             efecto["Col_F"],
90             efecto["Col_G"],
91             efecto["Col_H"]
92         ]
93         filas_resultado.append(fila)
94
95 # --- Exportar a la hoja "Code_Results" en modo acumulativo ---
96 if filas_resultado:
97     sheet.values().append(
98         spreadsheetId=SPREADSHEET_ID,
99         range='Code_Output!A1',
100         valueInputOption='RAW',
101         insertDataOption='INSERT_ROWS',
102         body={'values': filas_resultado}
103     ).execute()
104     print(f"✅ Exportadas {len(filas_resultado)} filas con enlace de fuente incluido.")
105 else:
106     print("⚠️ No se exportó nada: no hubo efectos que cumplieran suficiencia (Indicadores +
107

```

✅ Exportadas 3 filas con enlace de fuente incluido.
